# Supplementary material for: New Mild and Simple Approach to Isothiocyanates: A Class of Potent Anticancer Agents
Source: PubMed Central journal article supplement (PMC6152774; doi:10.3390/molecules22060773), 2017-06-01

# Supplementary Material

## New Mild and Simple Approach to Isothiocyanates: A Class of Potent Anticancer Agents

Bingling Luo <sup>1,2,†</sup>, Jiankang Wang <sup>1,2,†</sup>, Xiaobing Li <sup>1</sup>, Wenhua Lu <sup>1</sup>, Jing Yang <sup>1</sup>, Yumin Hu <sup>1</sup>, Peng Huang <sup>1,2</sup> and Shijun Wen <sup>1,2,\*</sup>

<sup>1</sup> Sun Yat-Sen University Cancer Center; State Key Laboratory of Oncology in South China; Collaborative Innovation Center for Cancer Medicine; Sun Yat-Sen University, 651 Dongfeng East Road, Guangzhou 510060, China; luobl@sysucc.org.cn (B.L.); lixiaobing0629@126.com (X.L.); luwenh@sysucc.org.cn (W.L.); yangjing@sysucc.org.cn (J.Y.); huym@sysucc.org.cn (Y.H.); huangpeng@sysucc.org.cn (P.H.)

<sup>2</sup> School of Pharmaceutical Sciences, Sun Yat-sen University, 132 Waihuan East Road, Guangzhou 510006, China; wangjk6@mail2.sysu.edu.cn (J.W.)

\* Correspondence: wenshj@sysucc.org.cn; Tel.: +86-20-3994-3091

† The authors contributed equally to this work.

PEITC

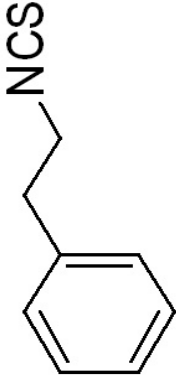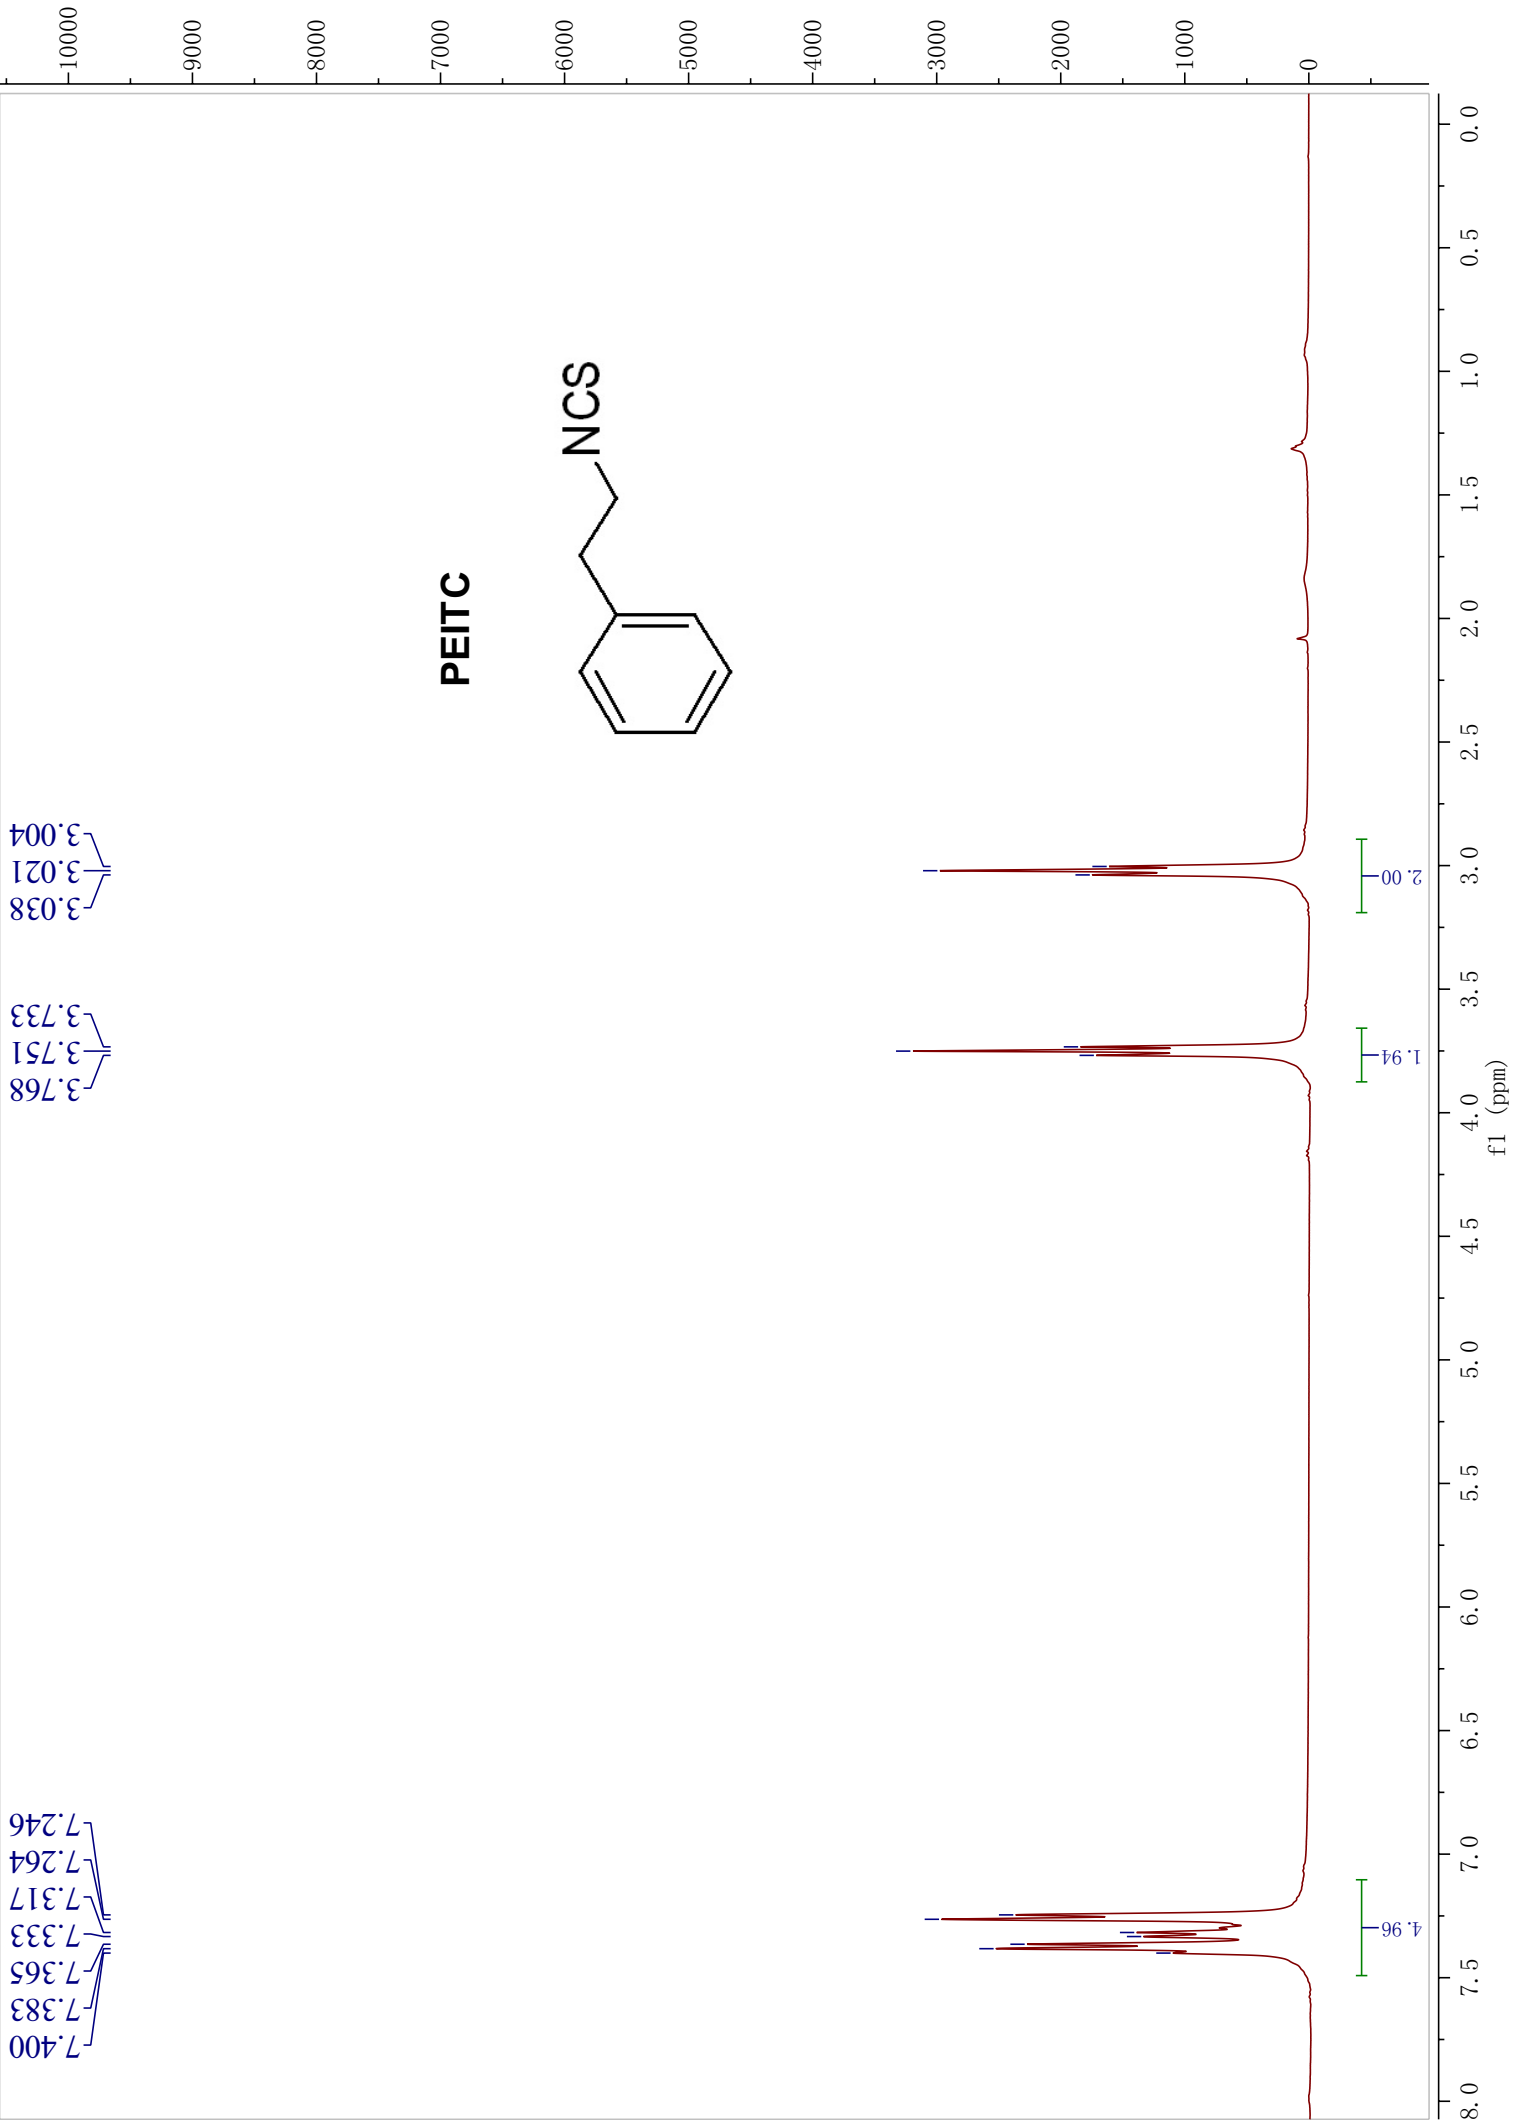

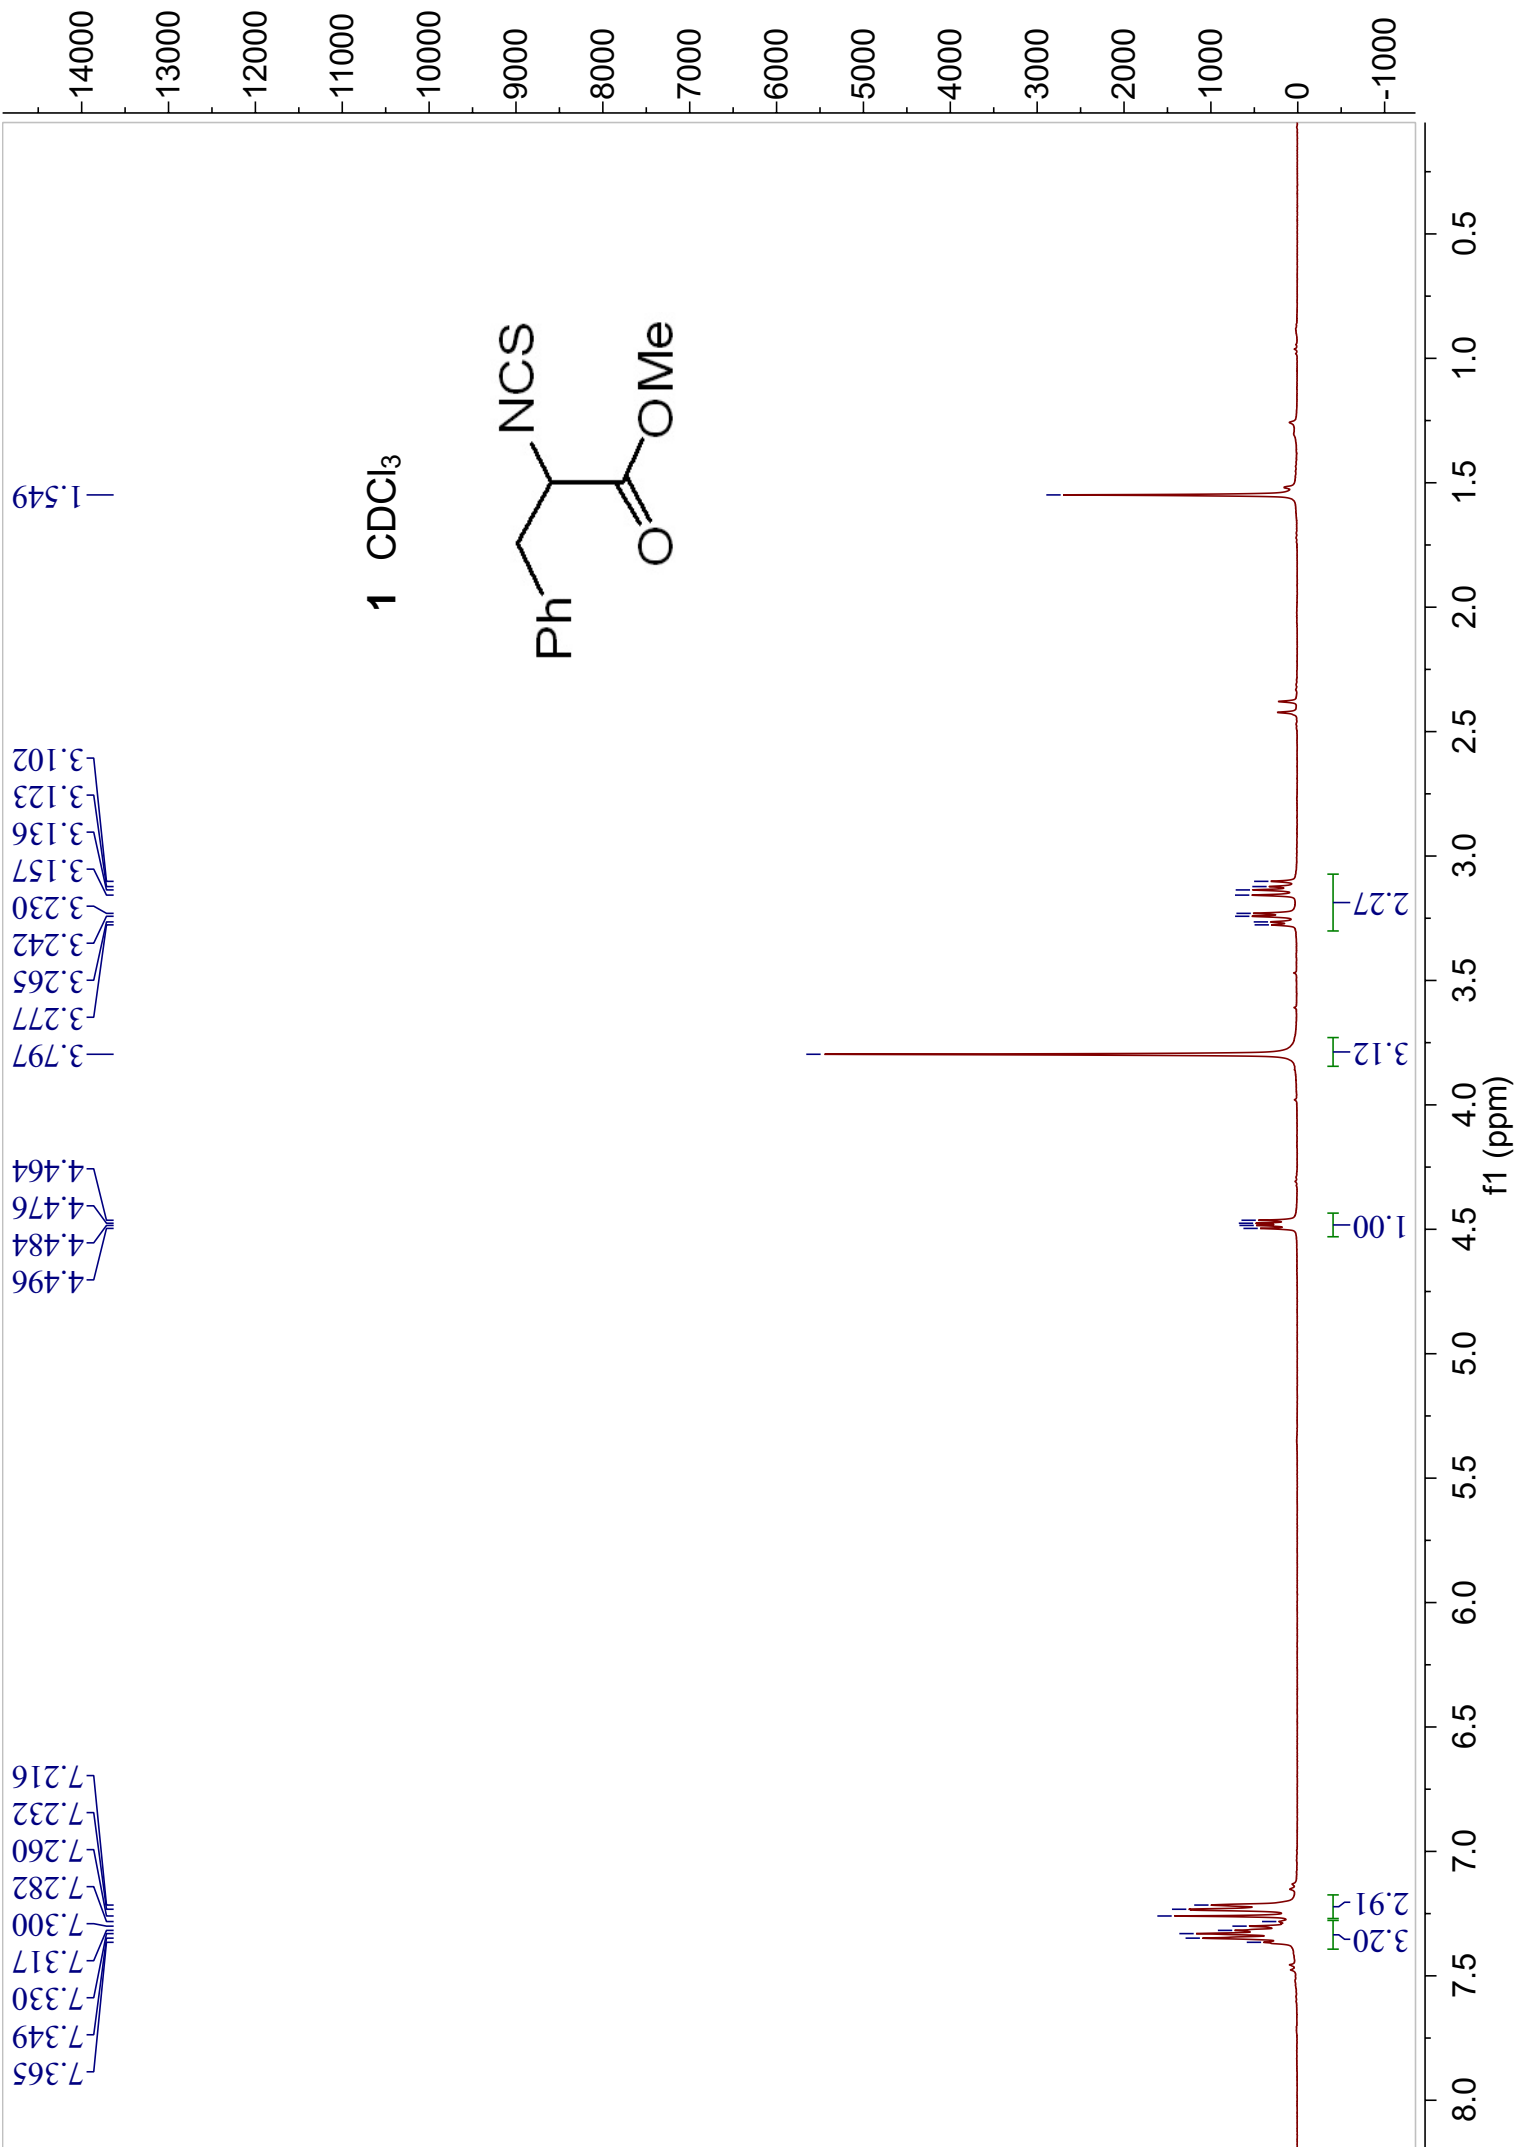

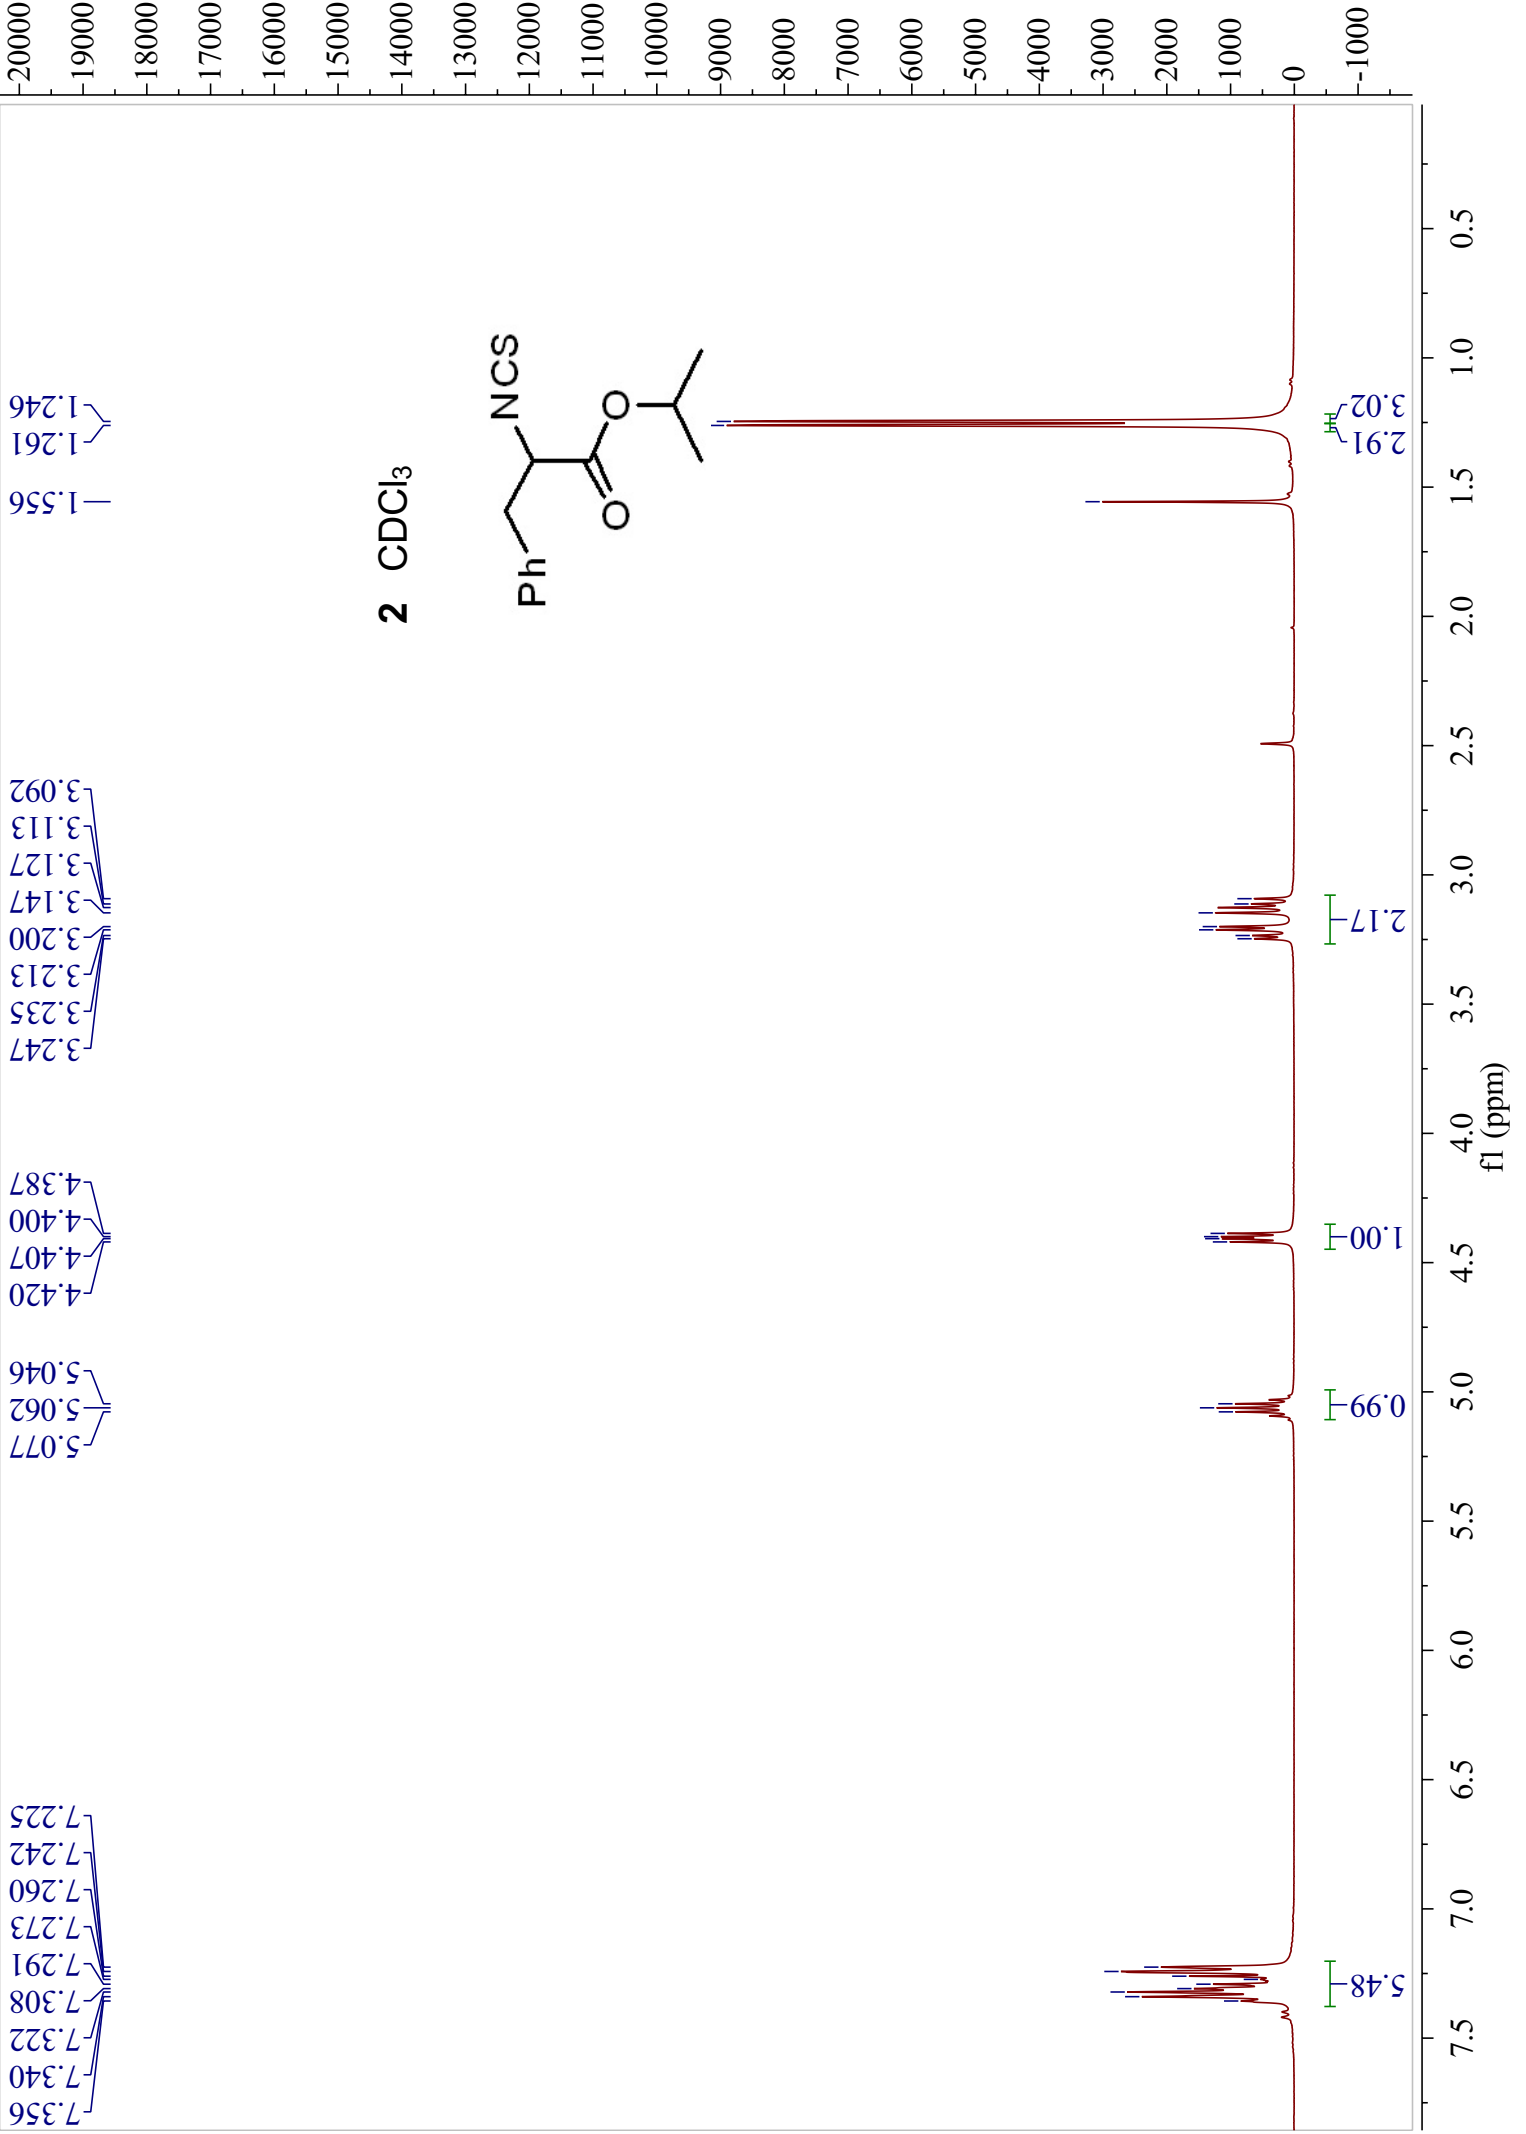

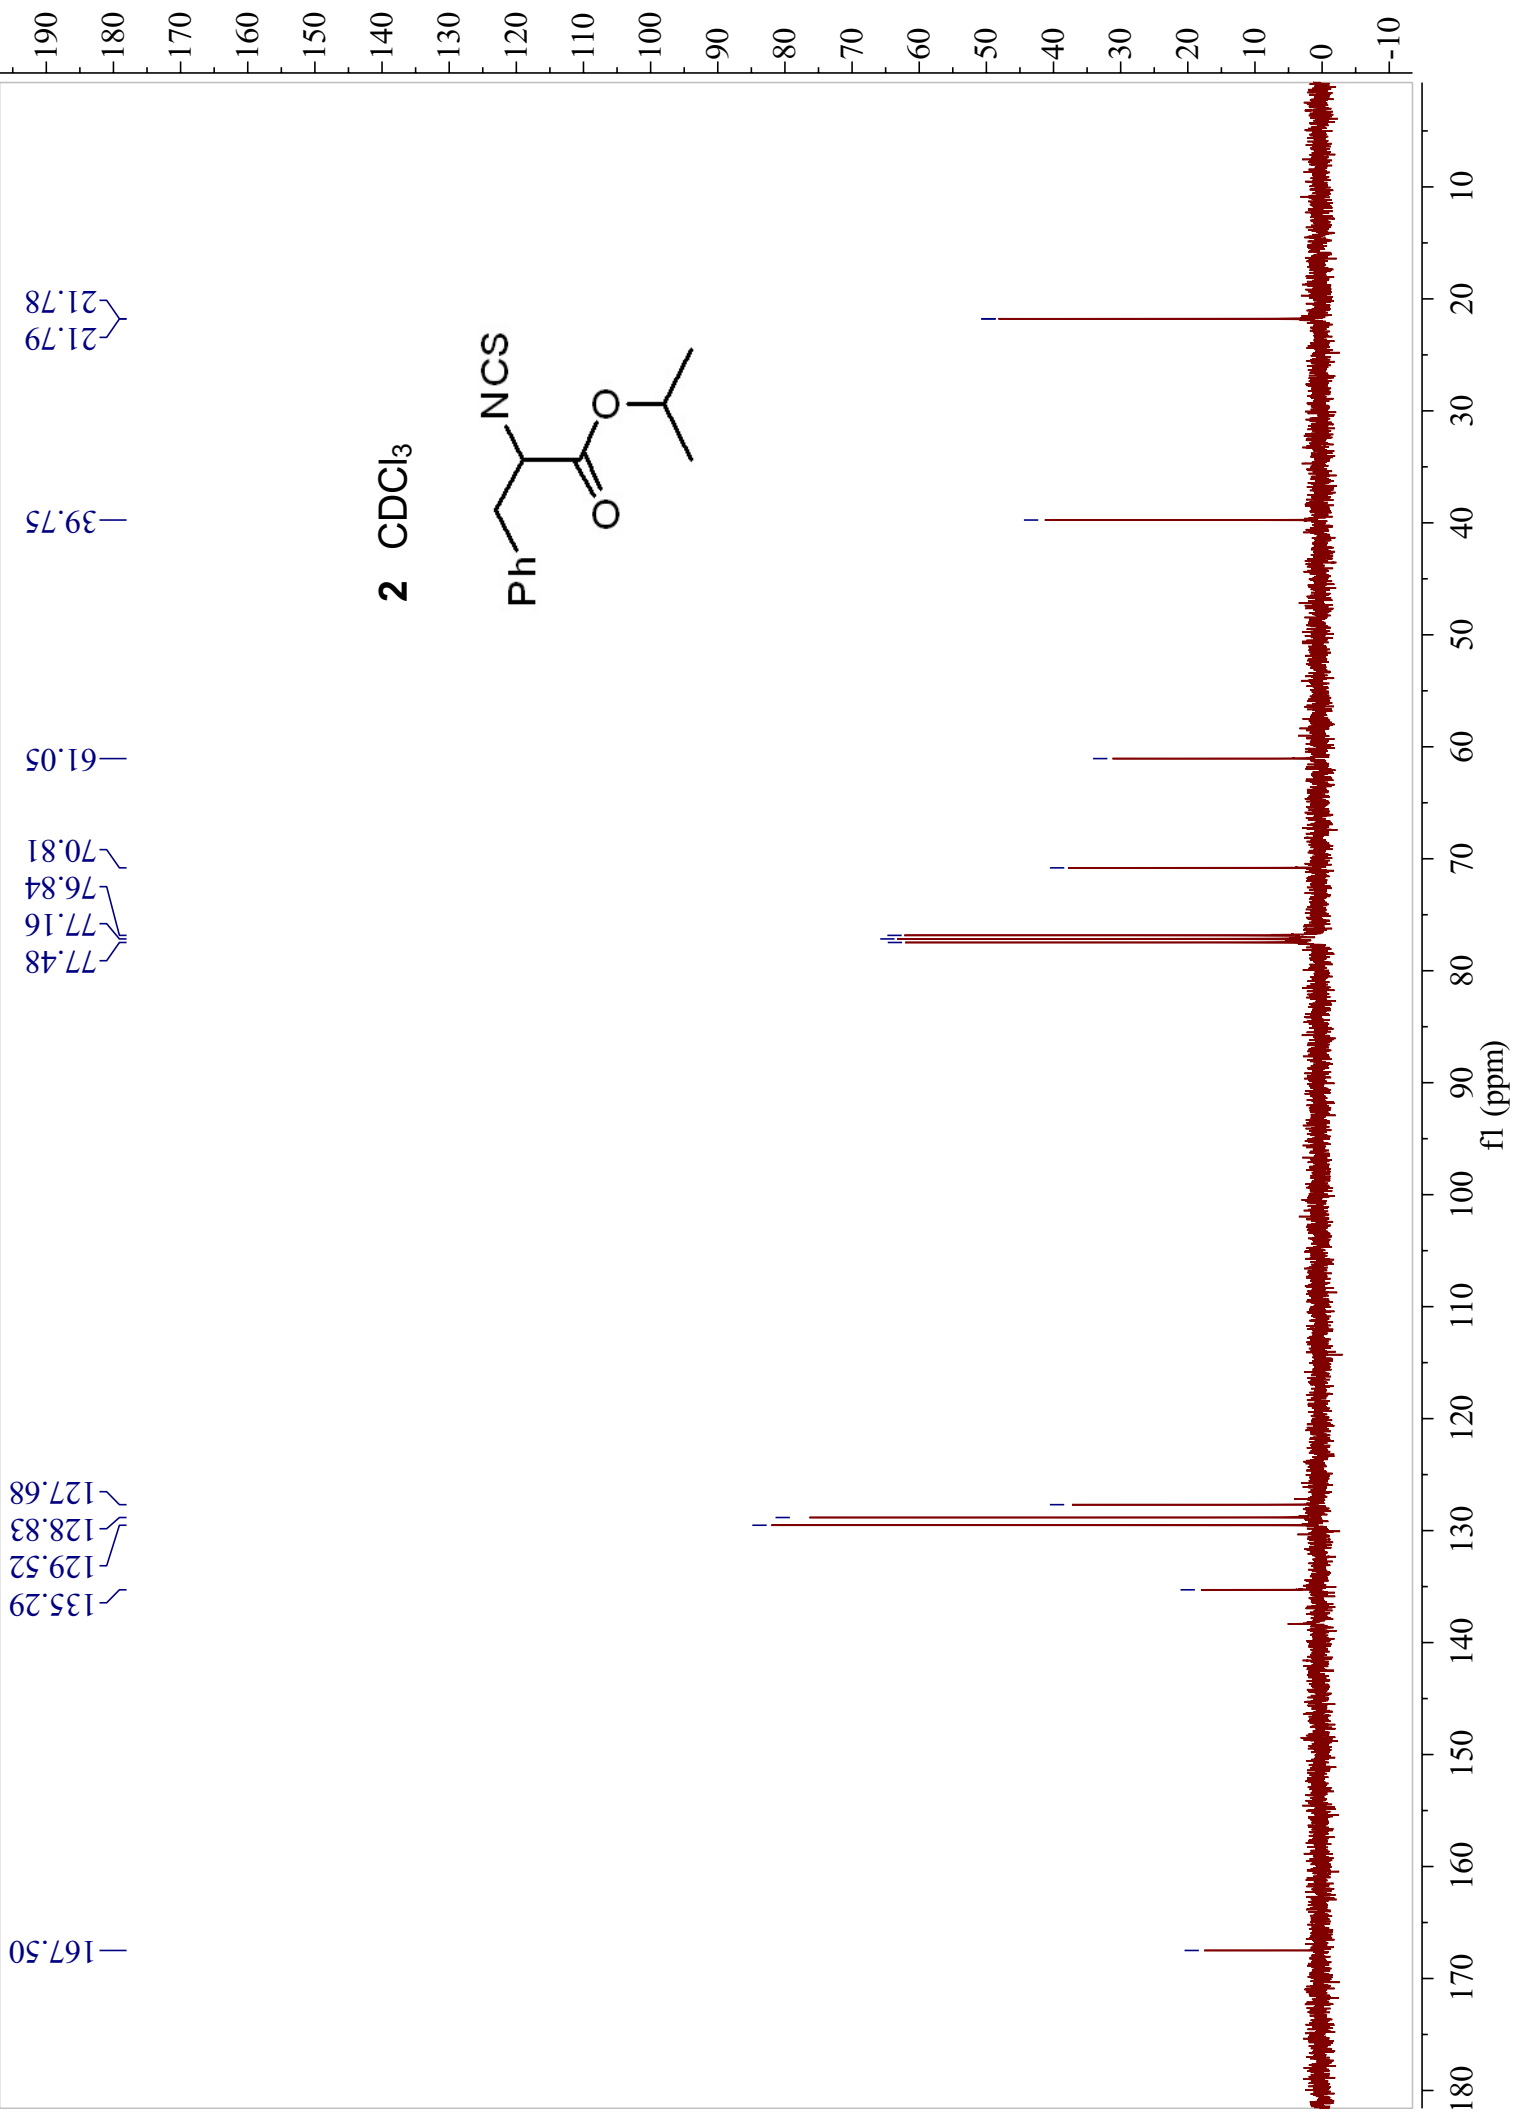

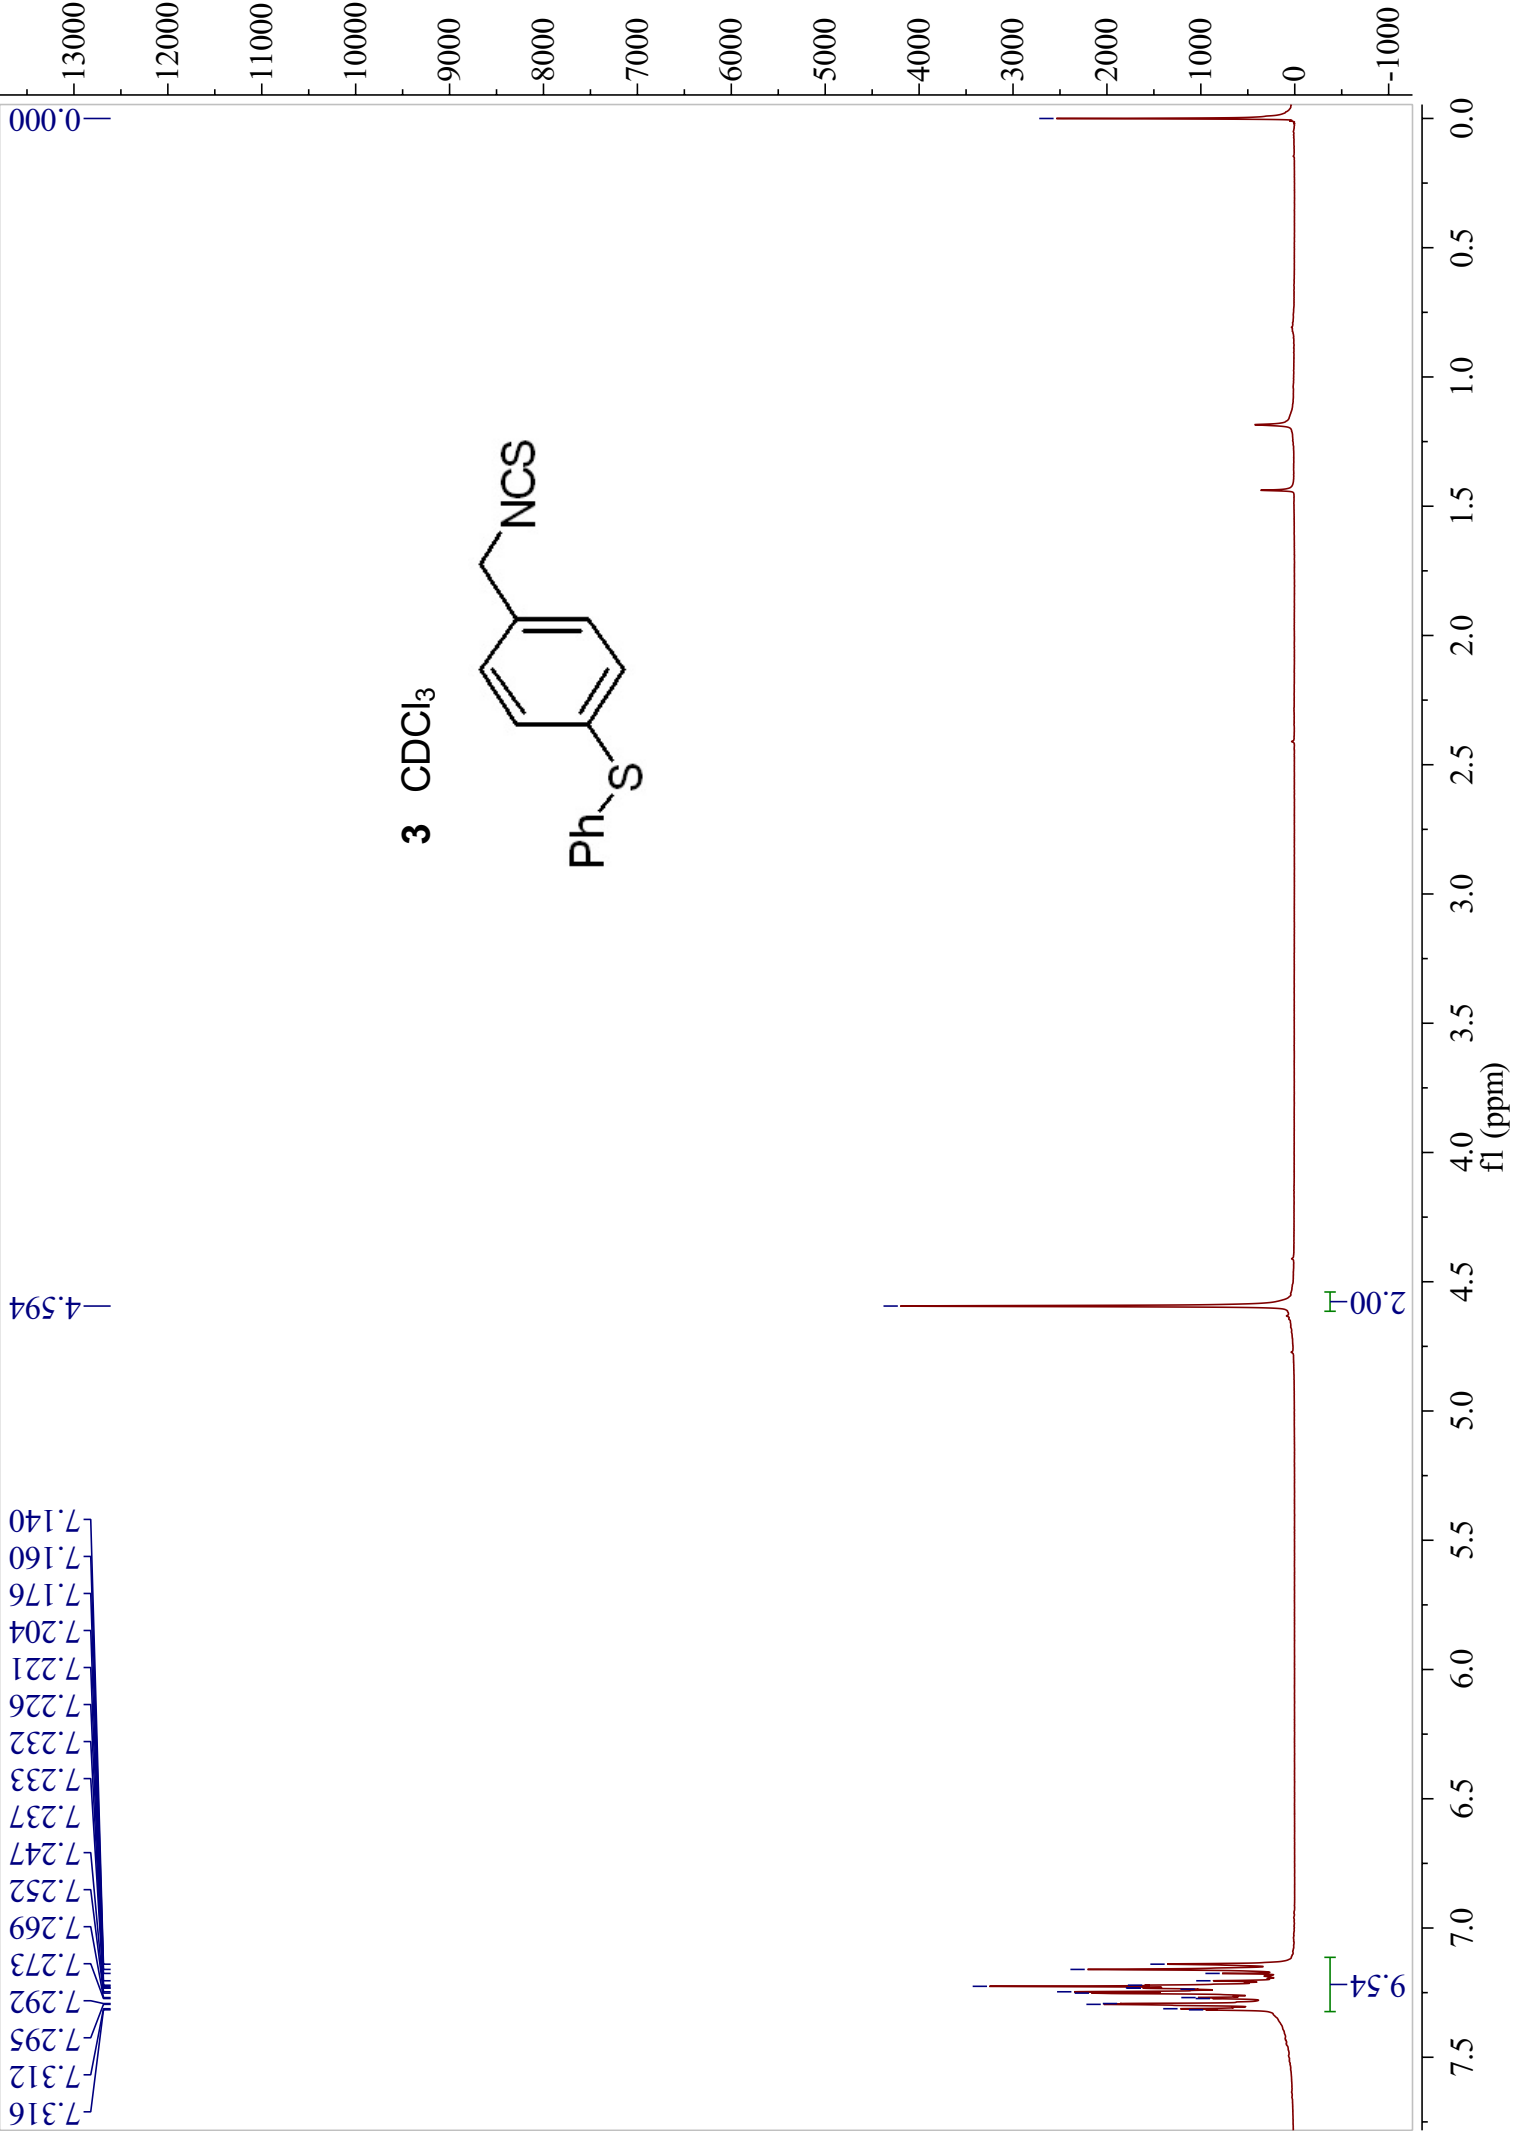

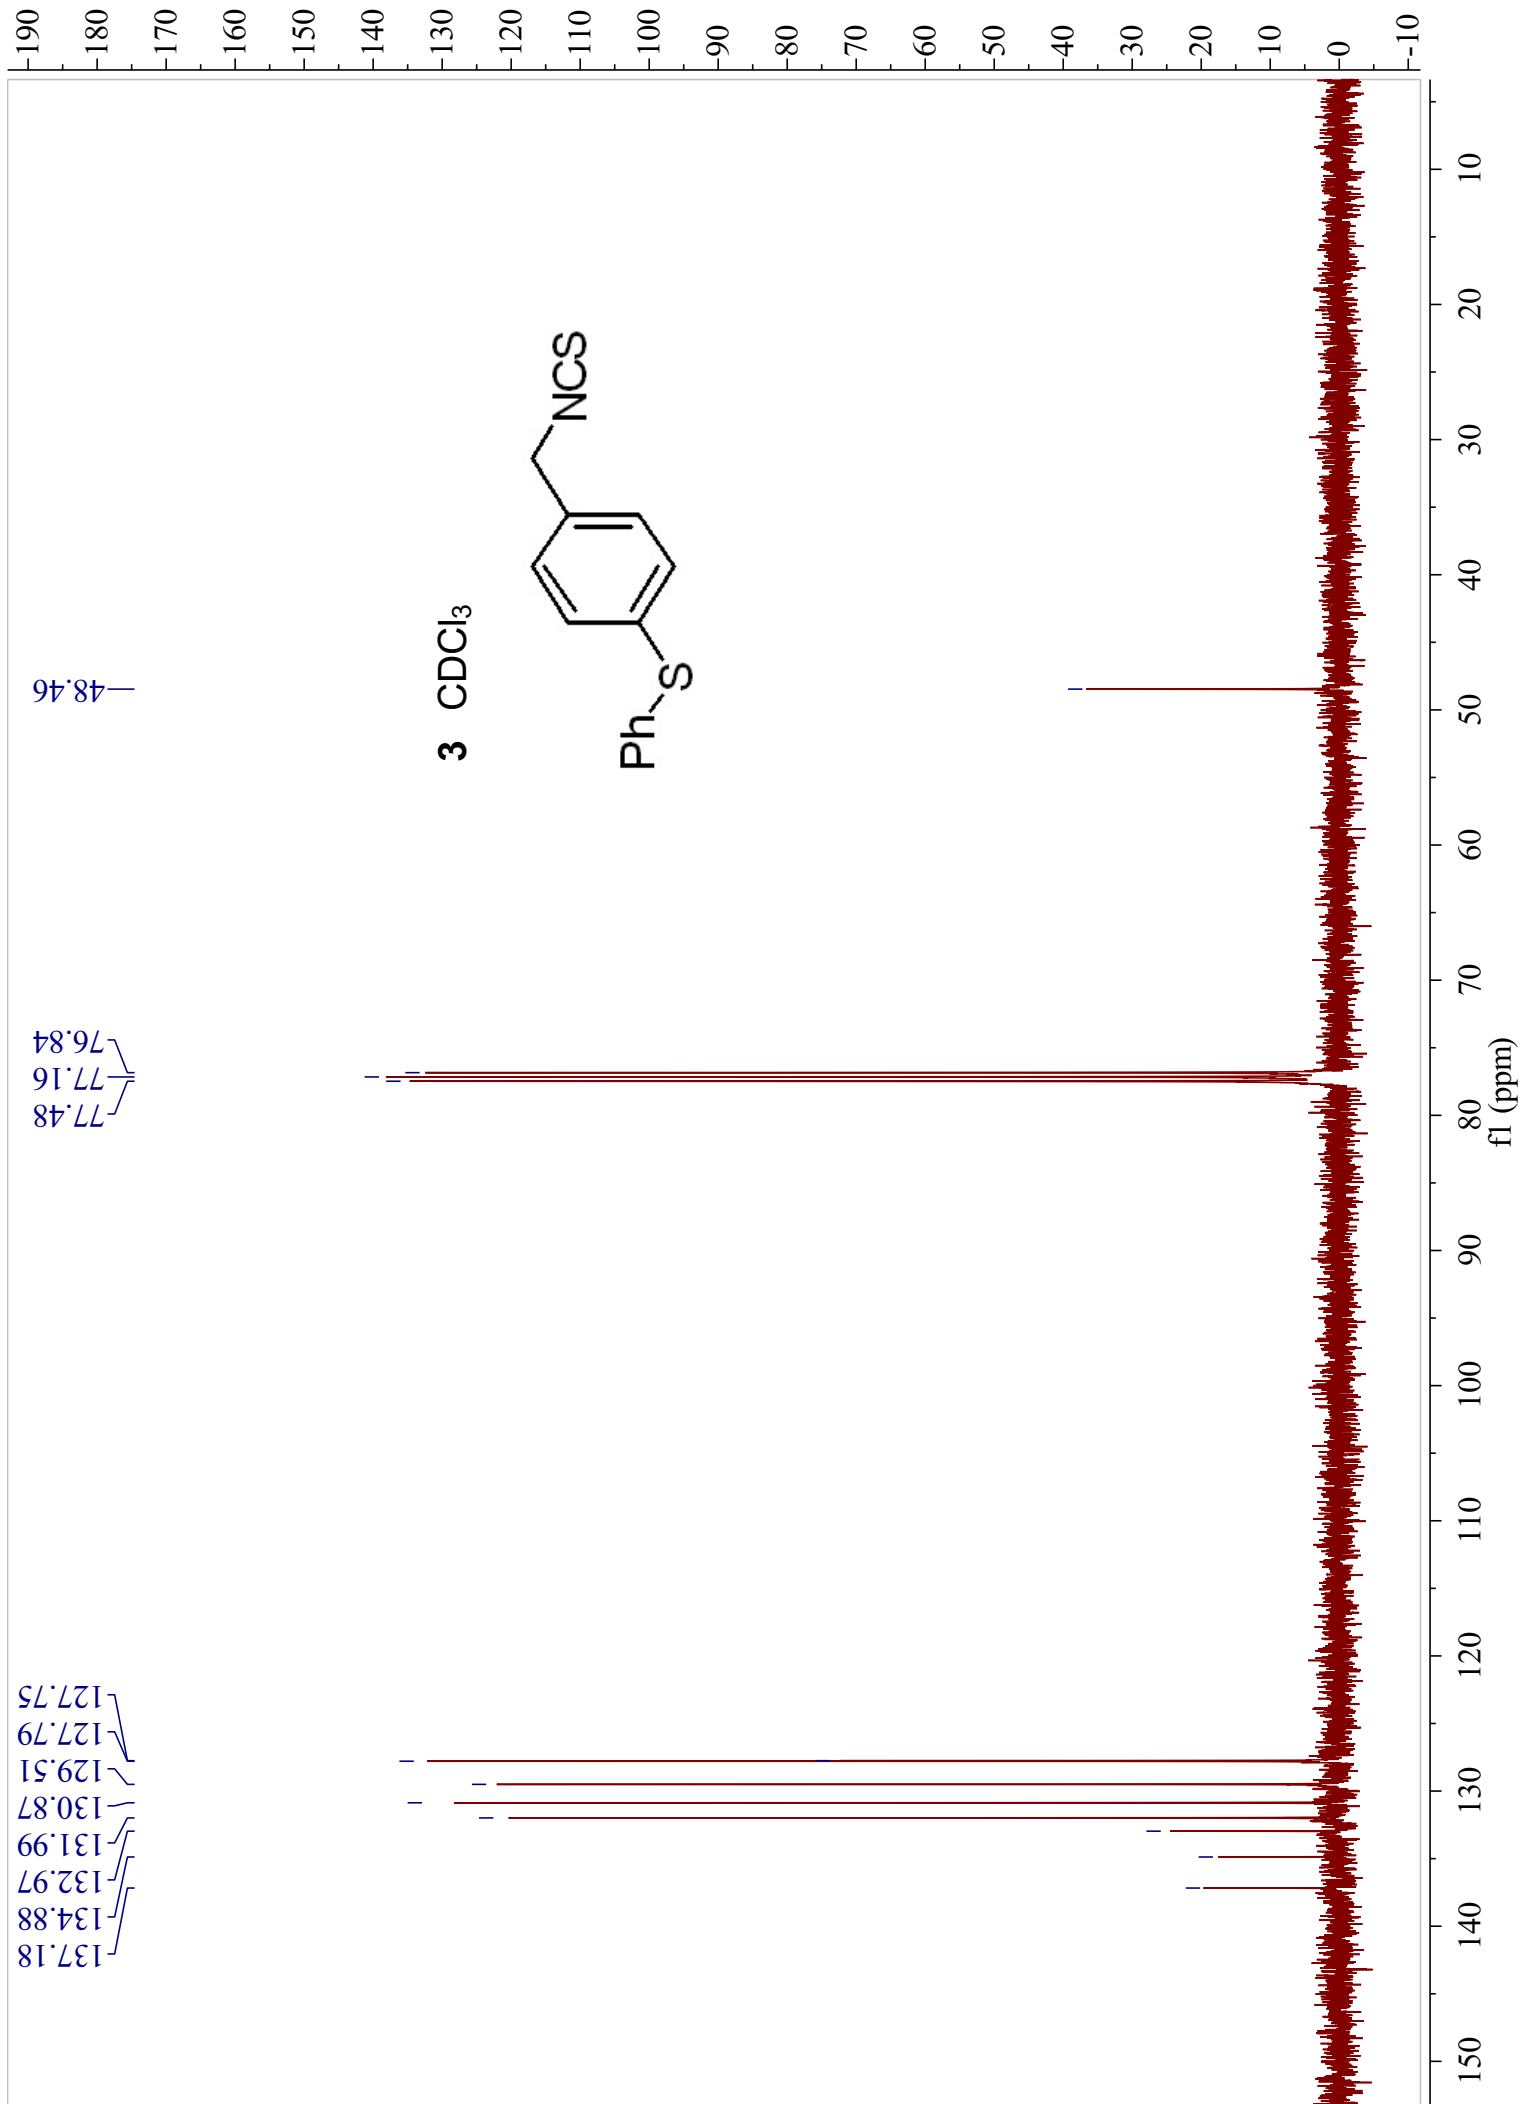

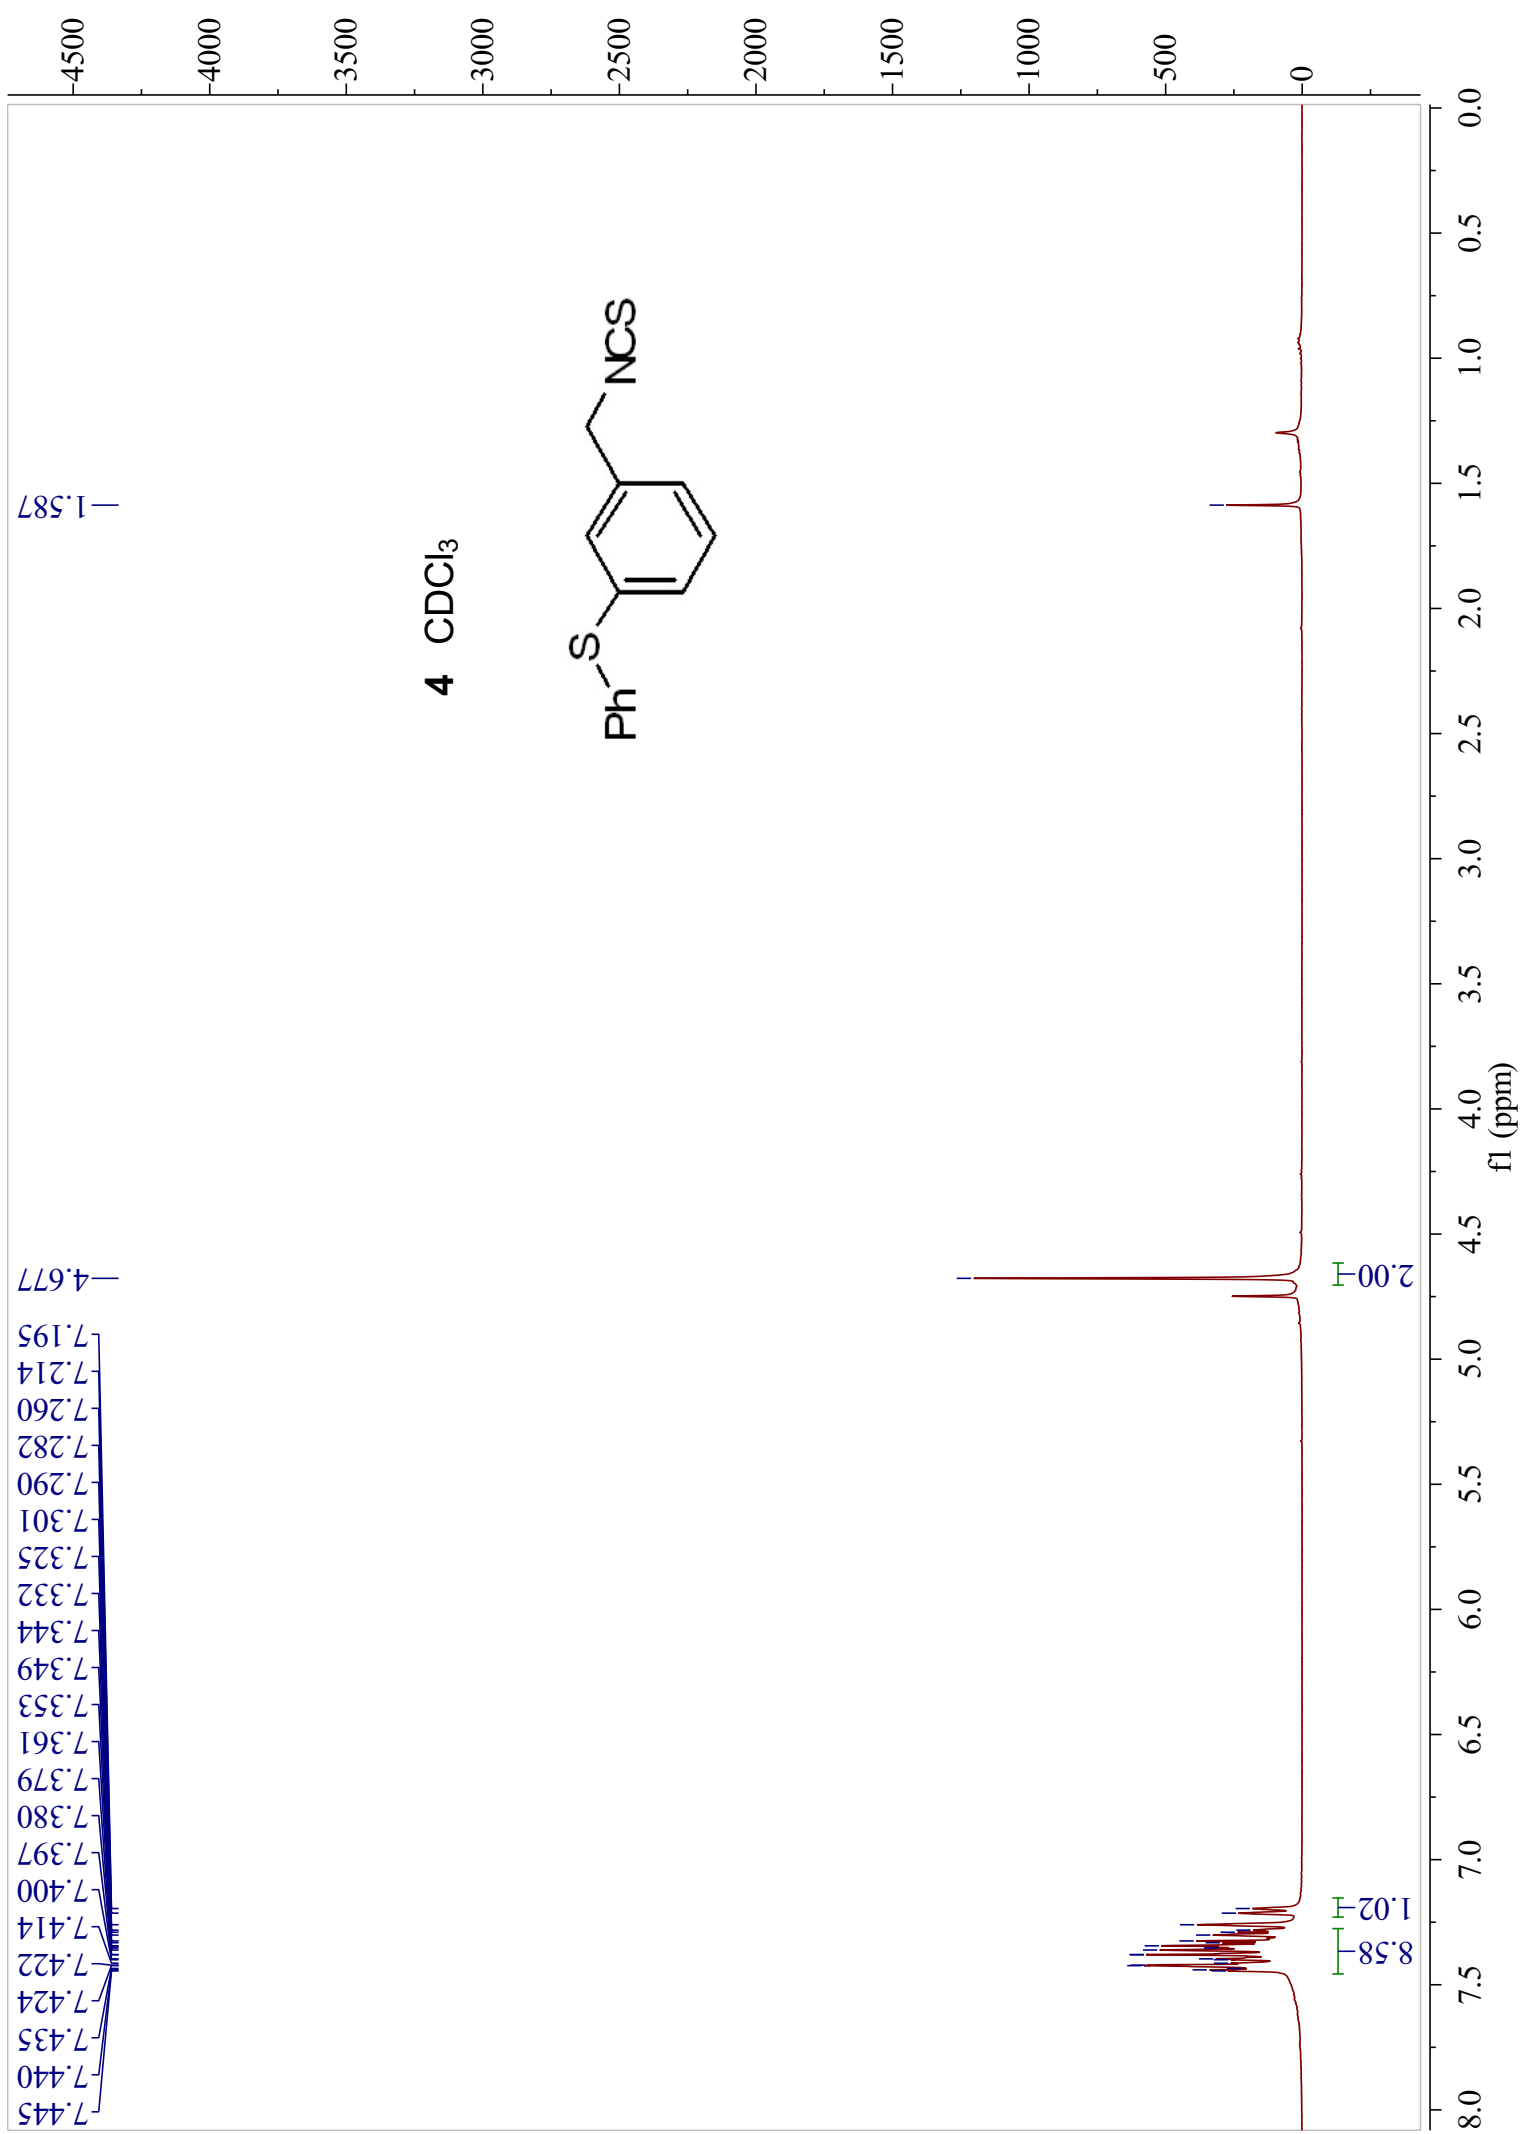



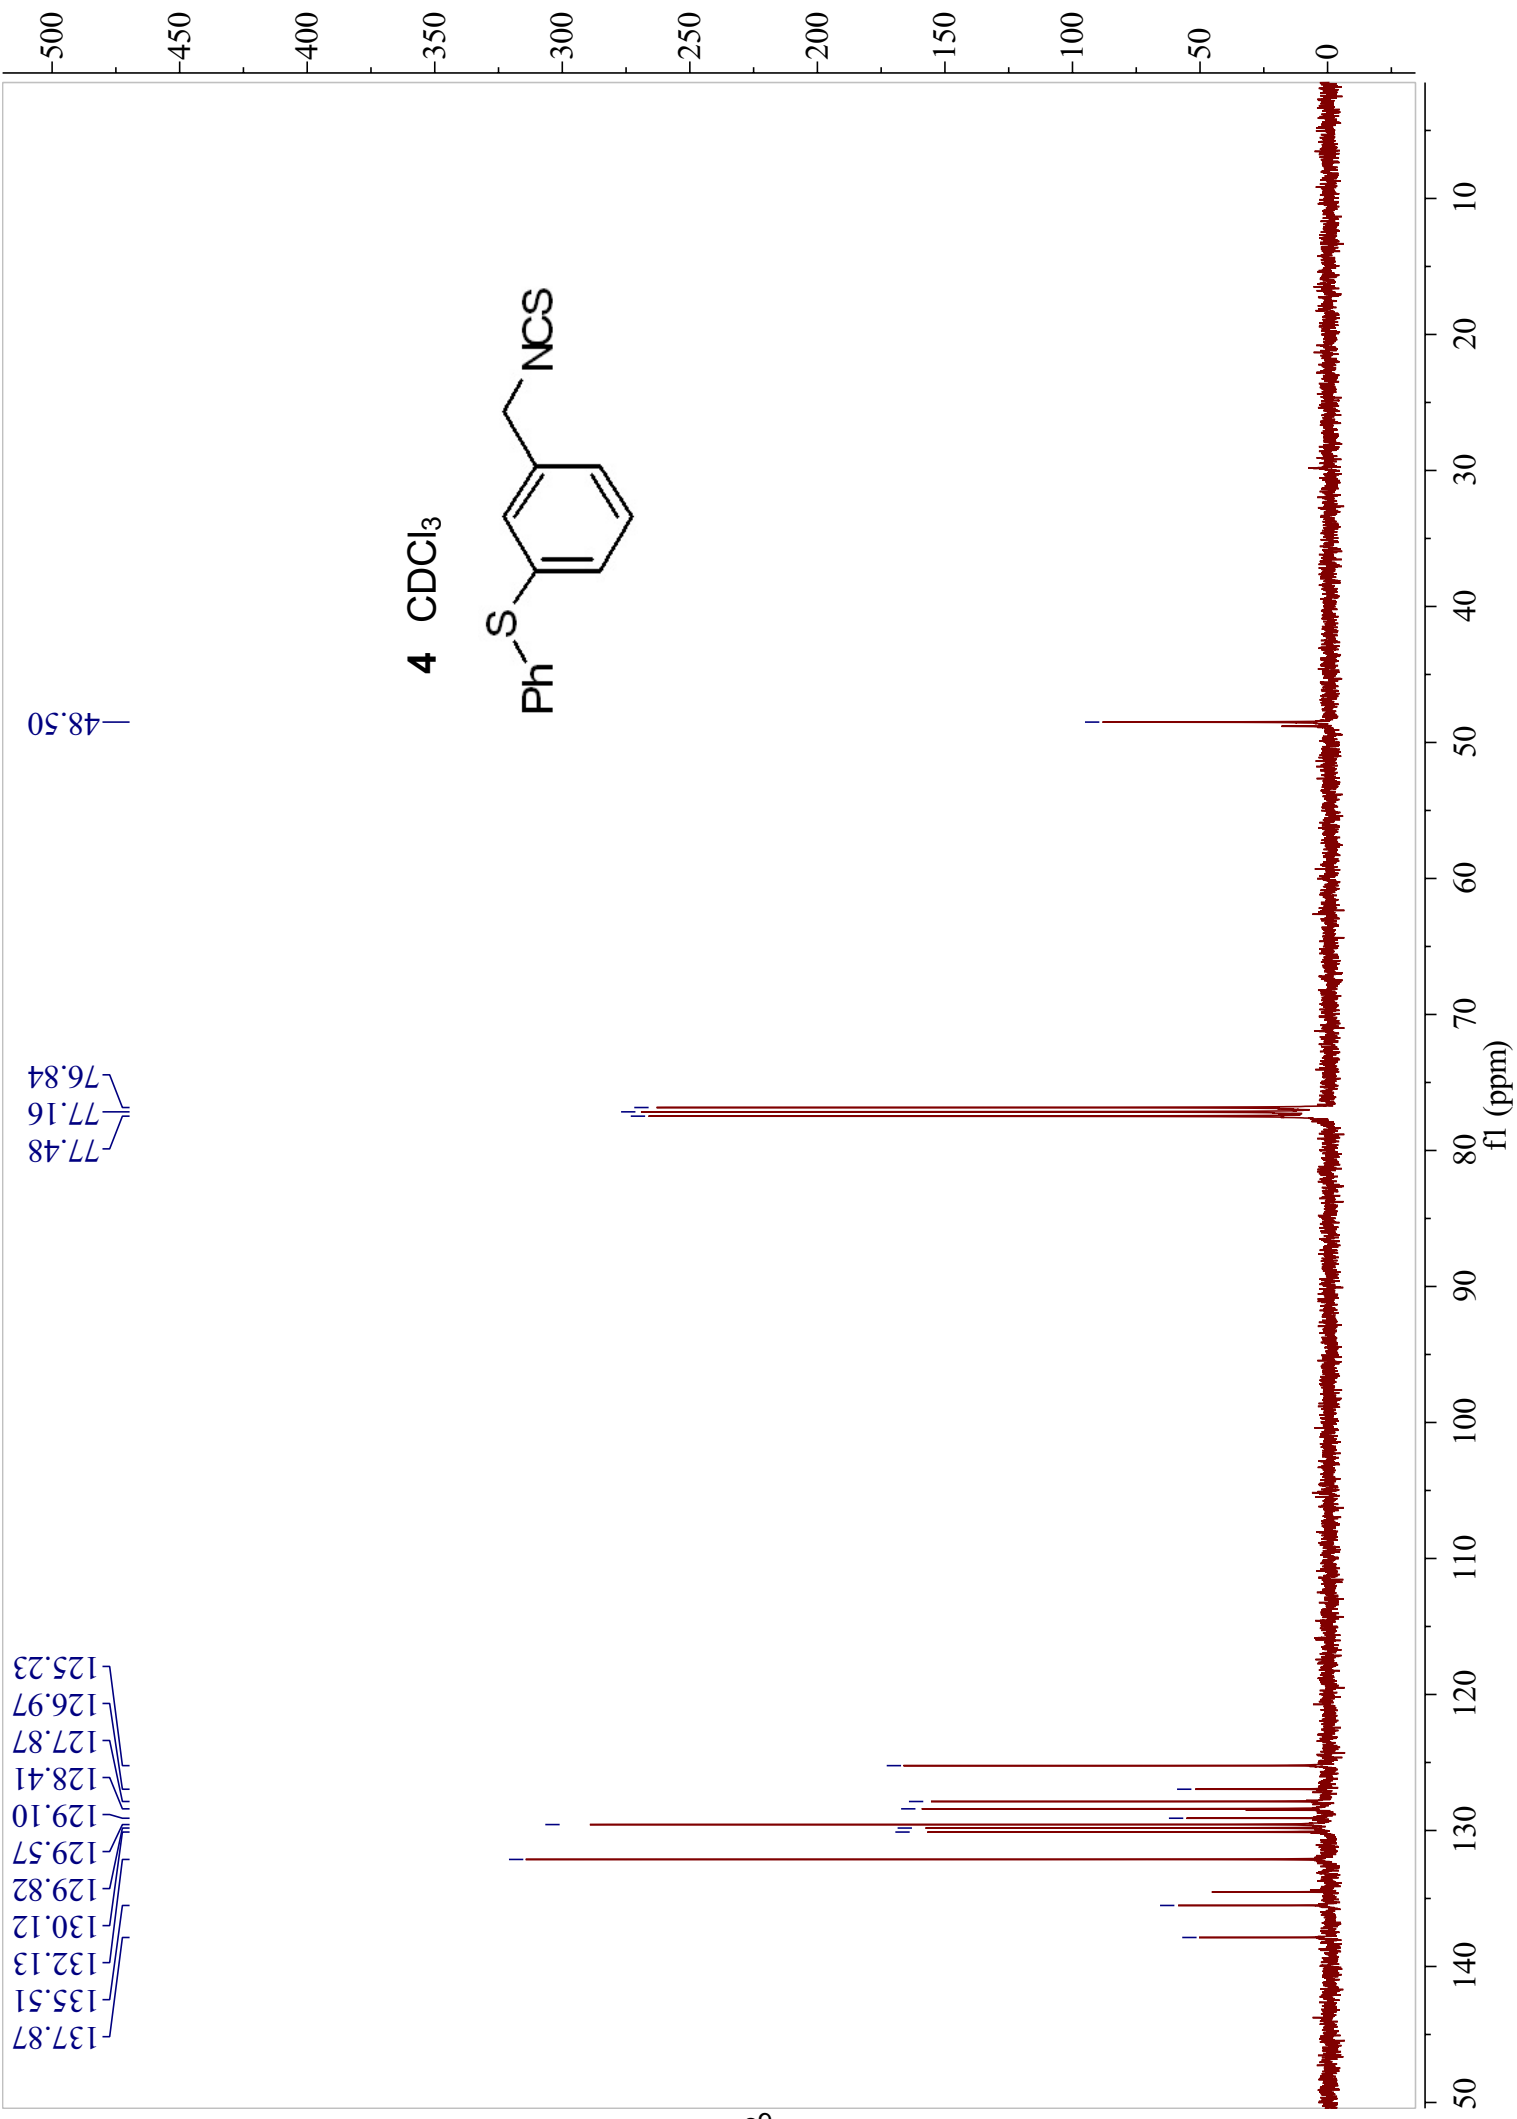

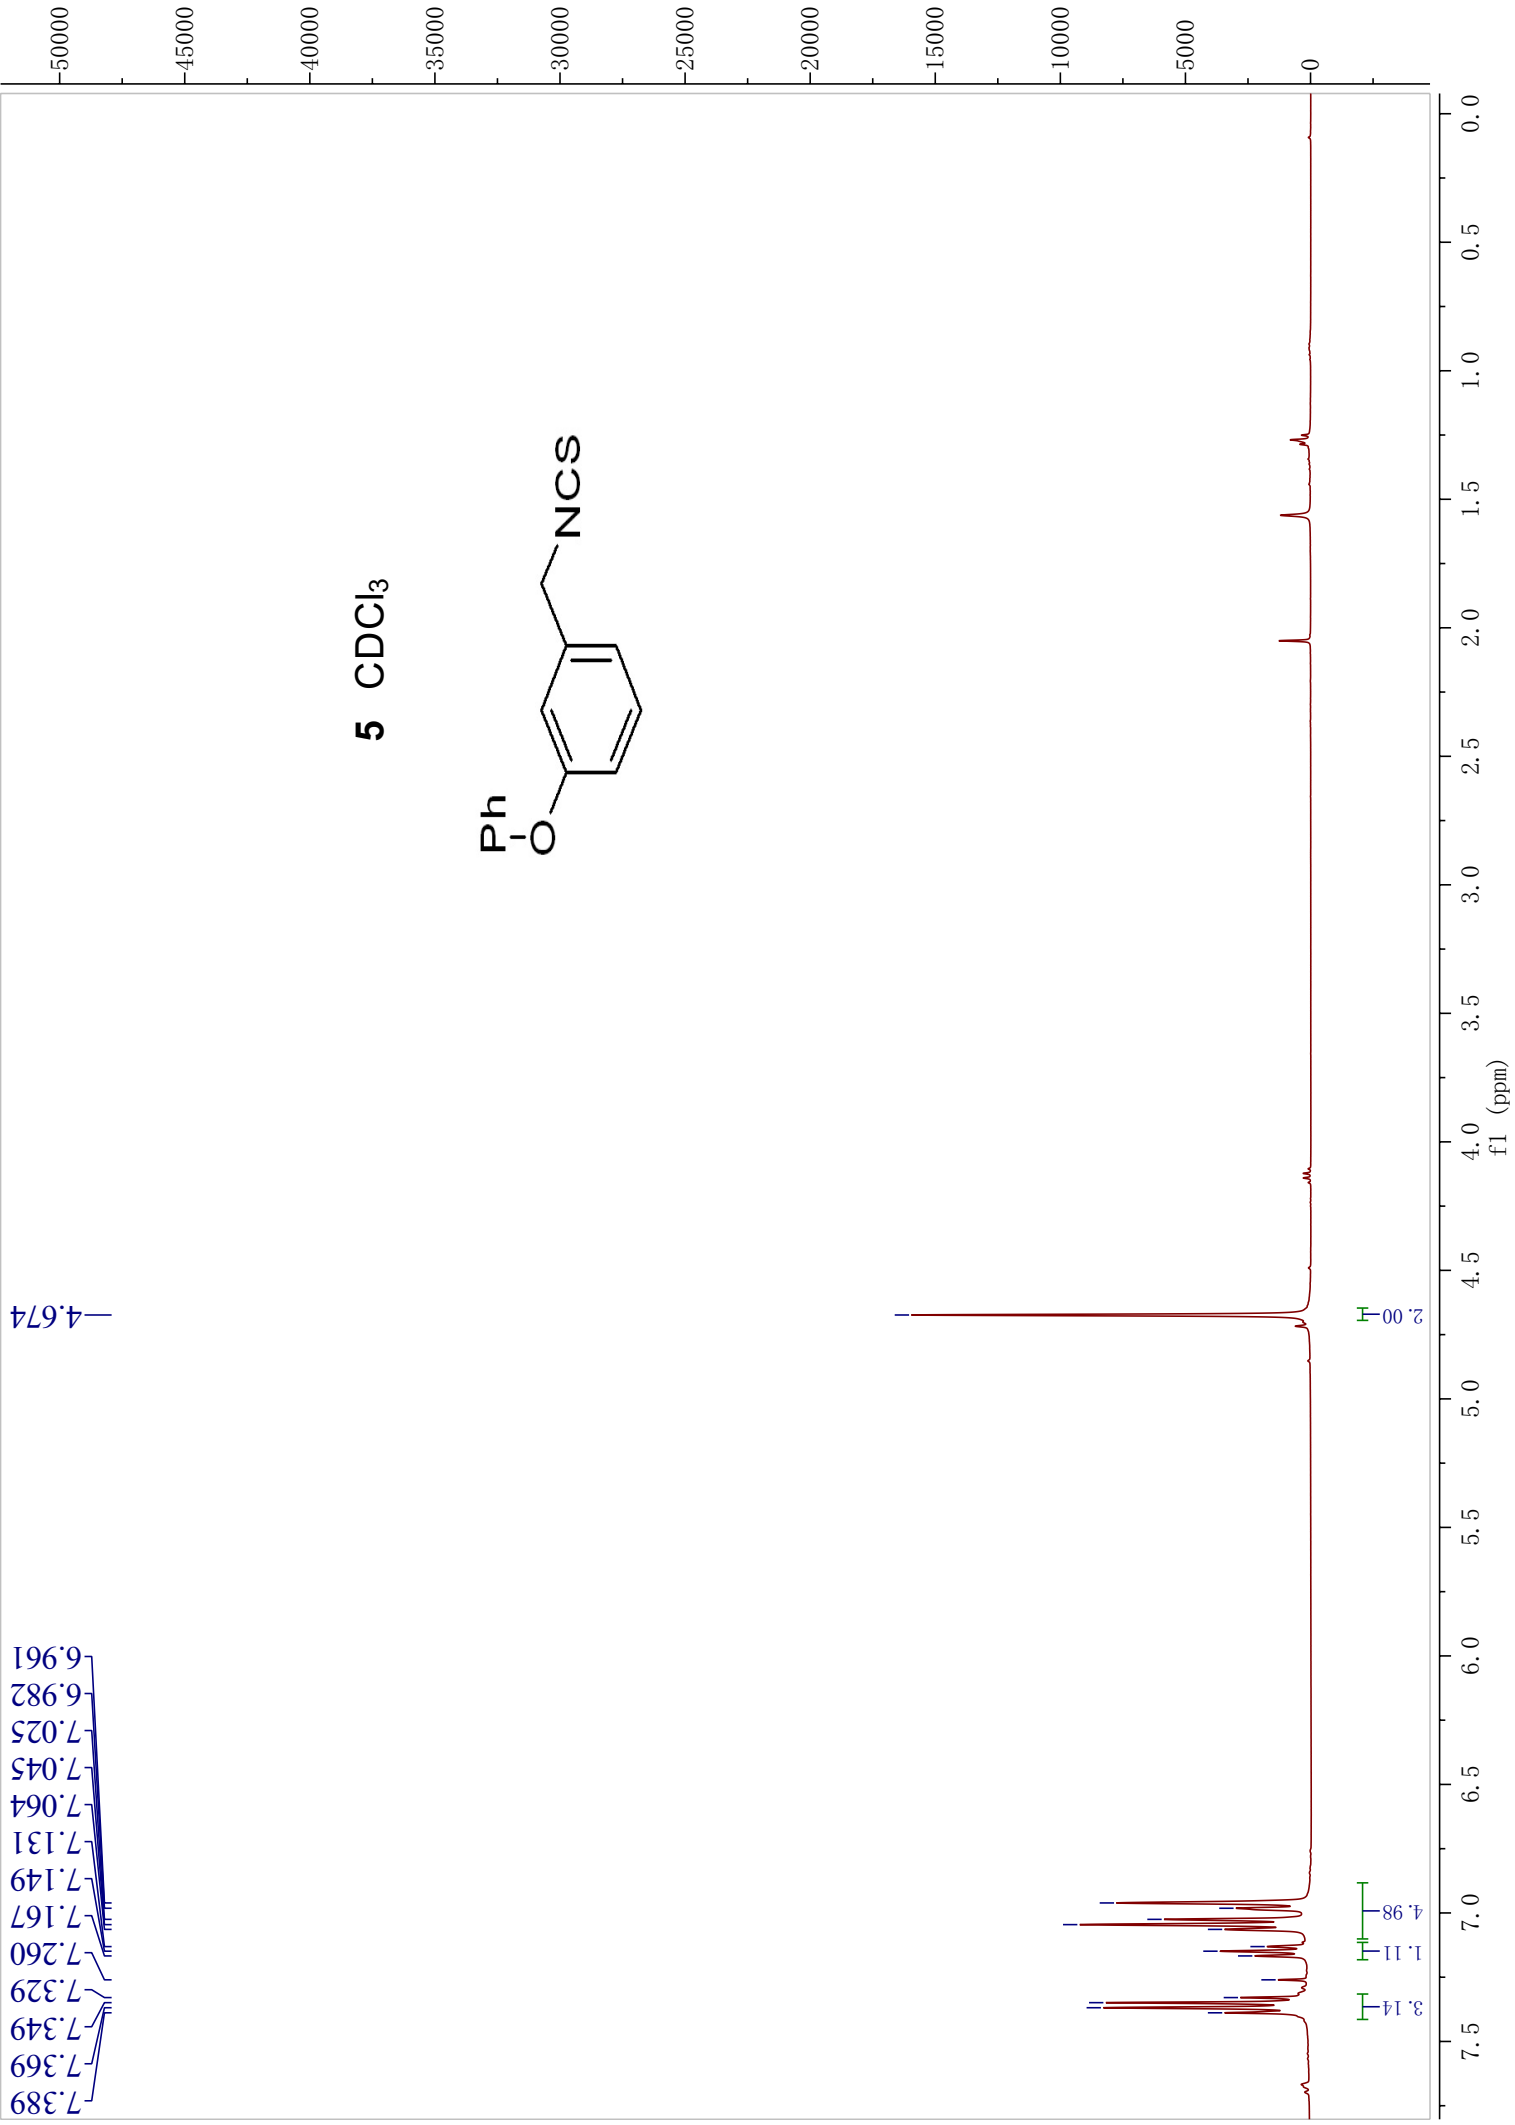

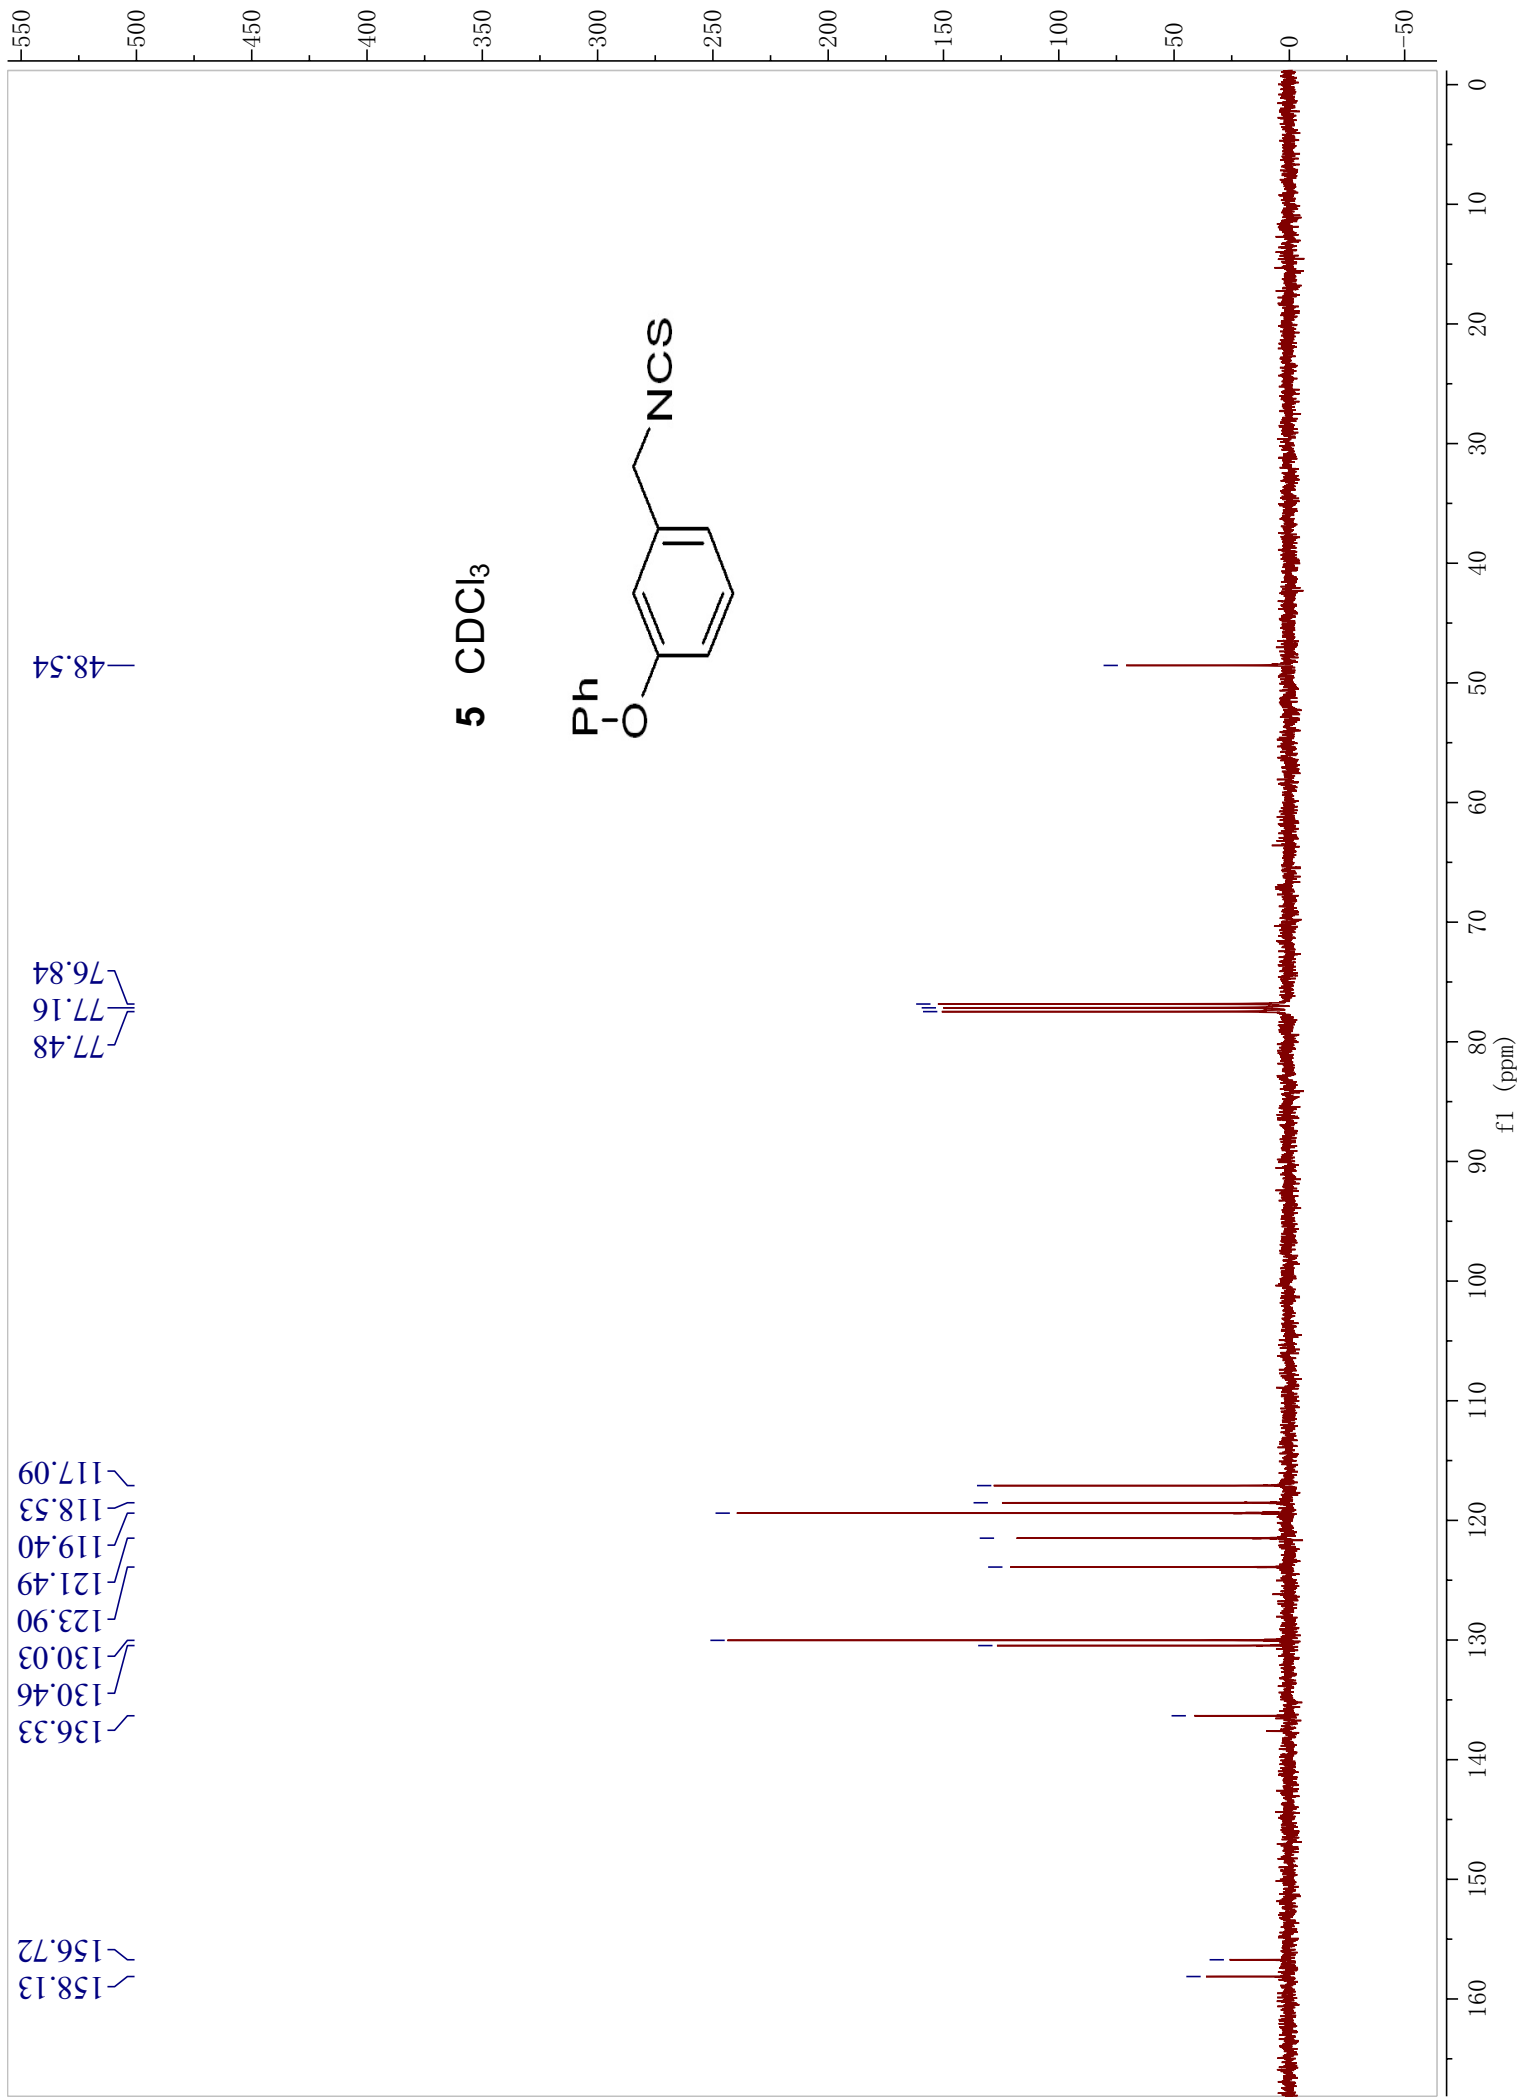

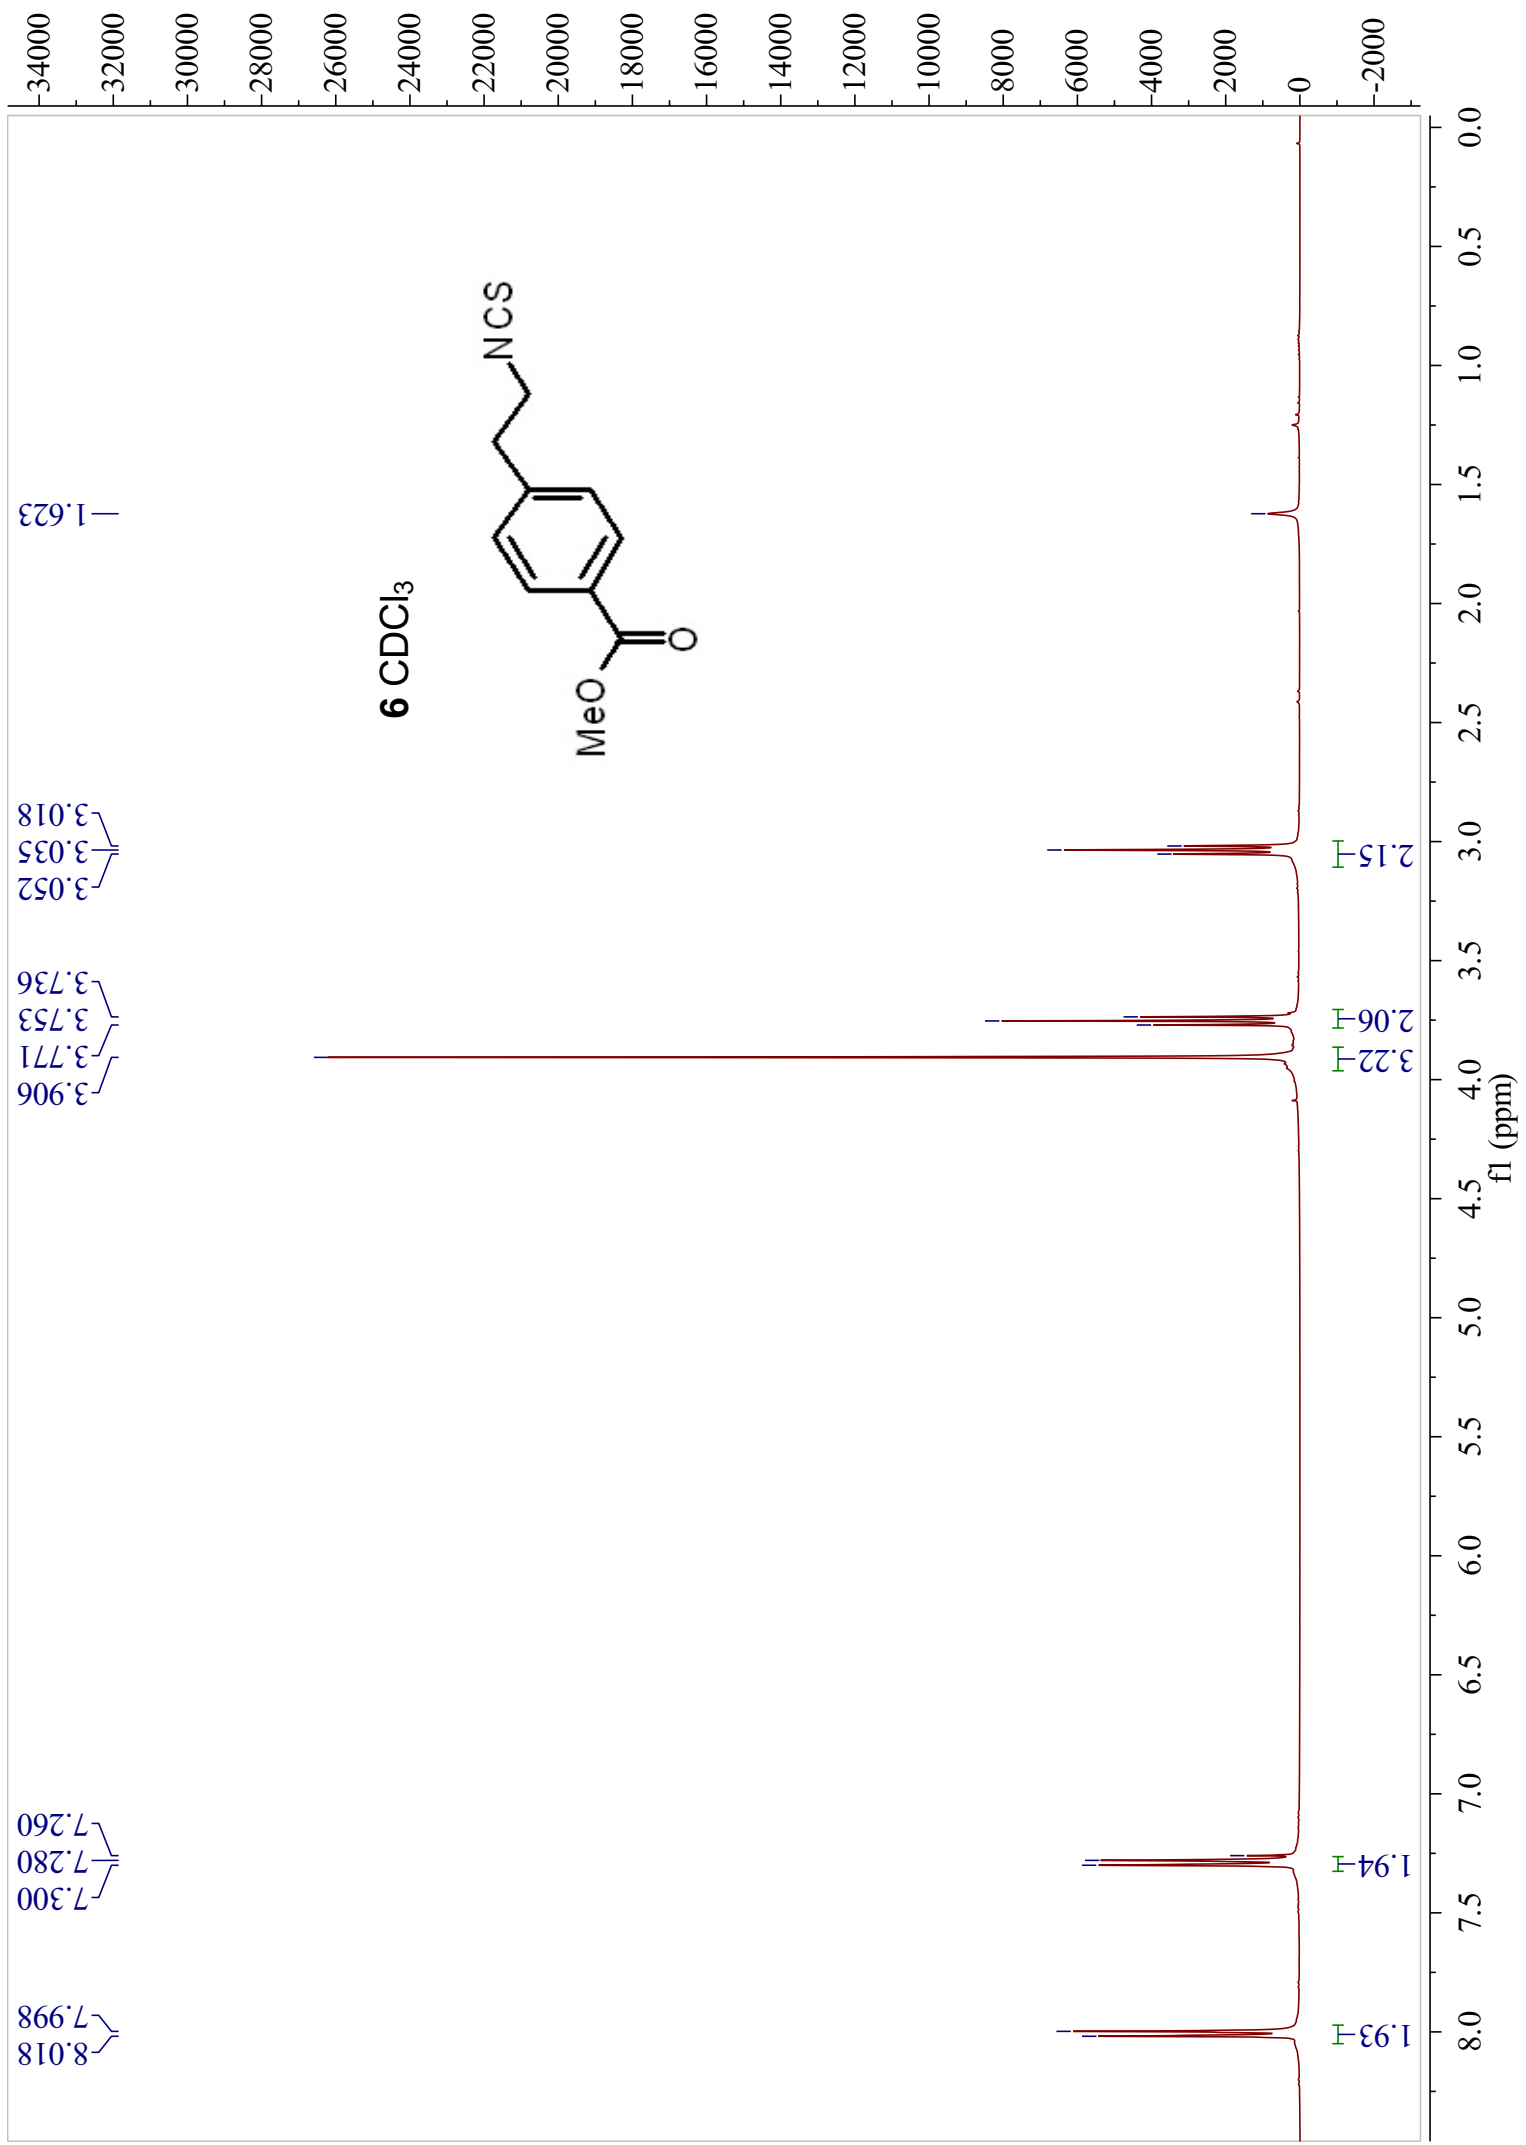

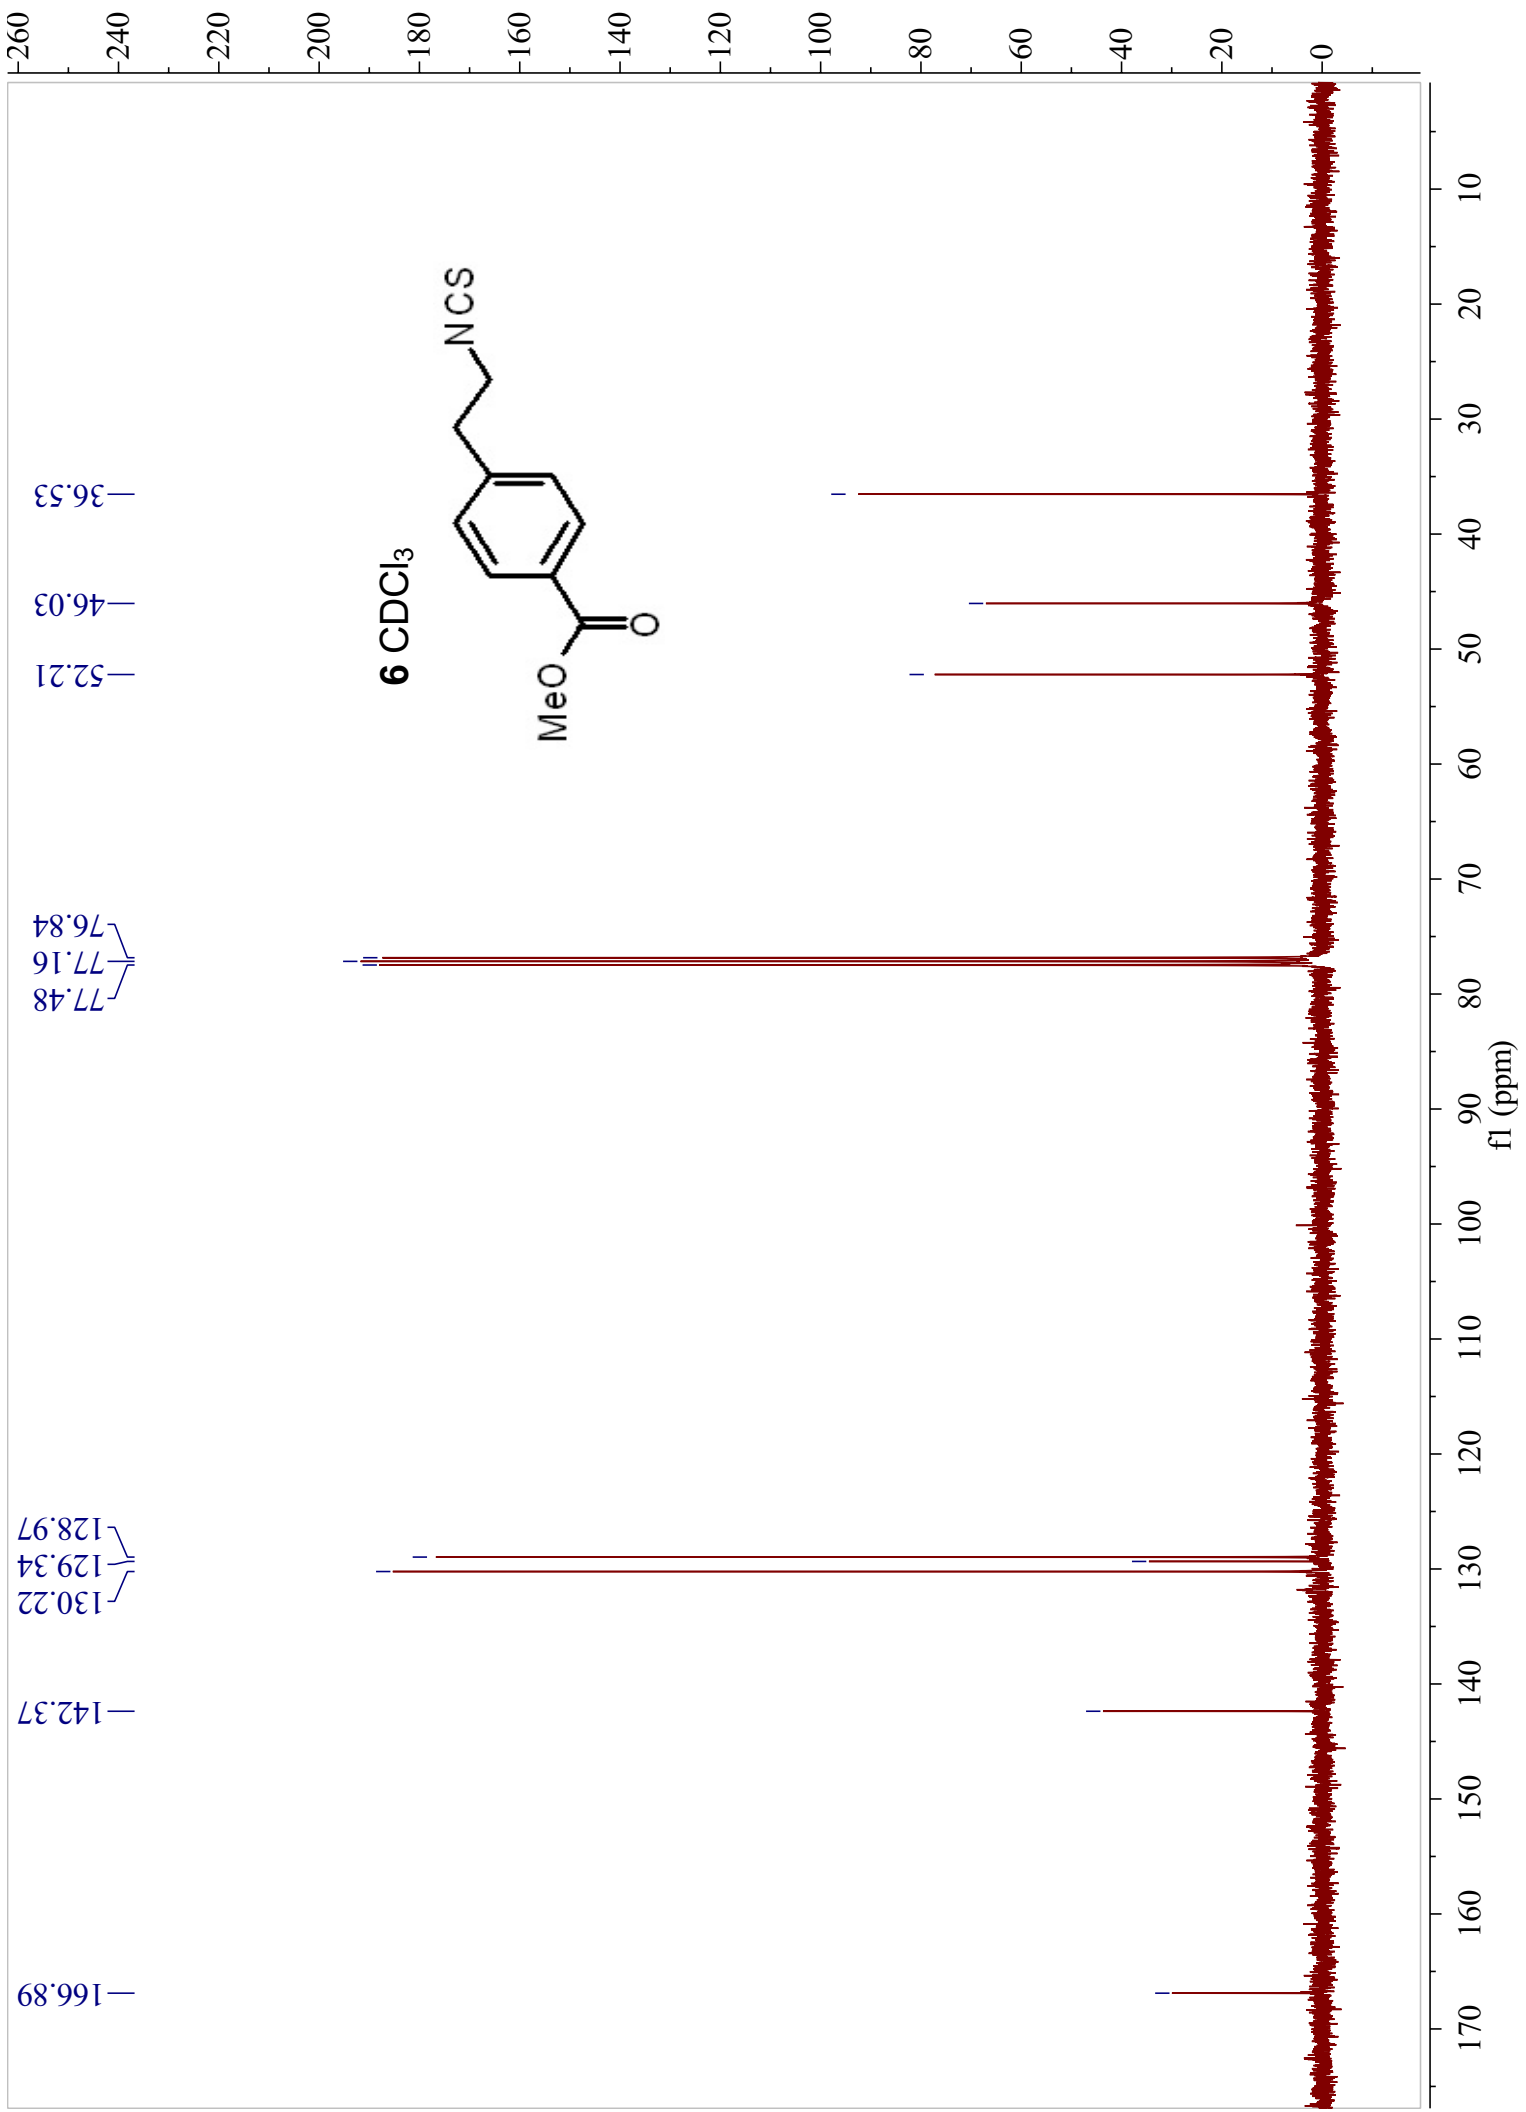

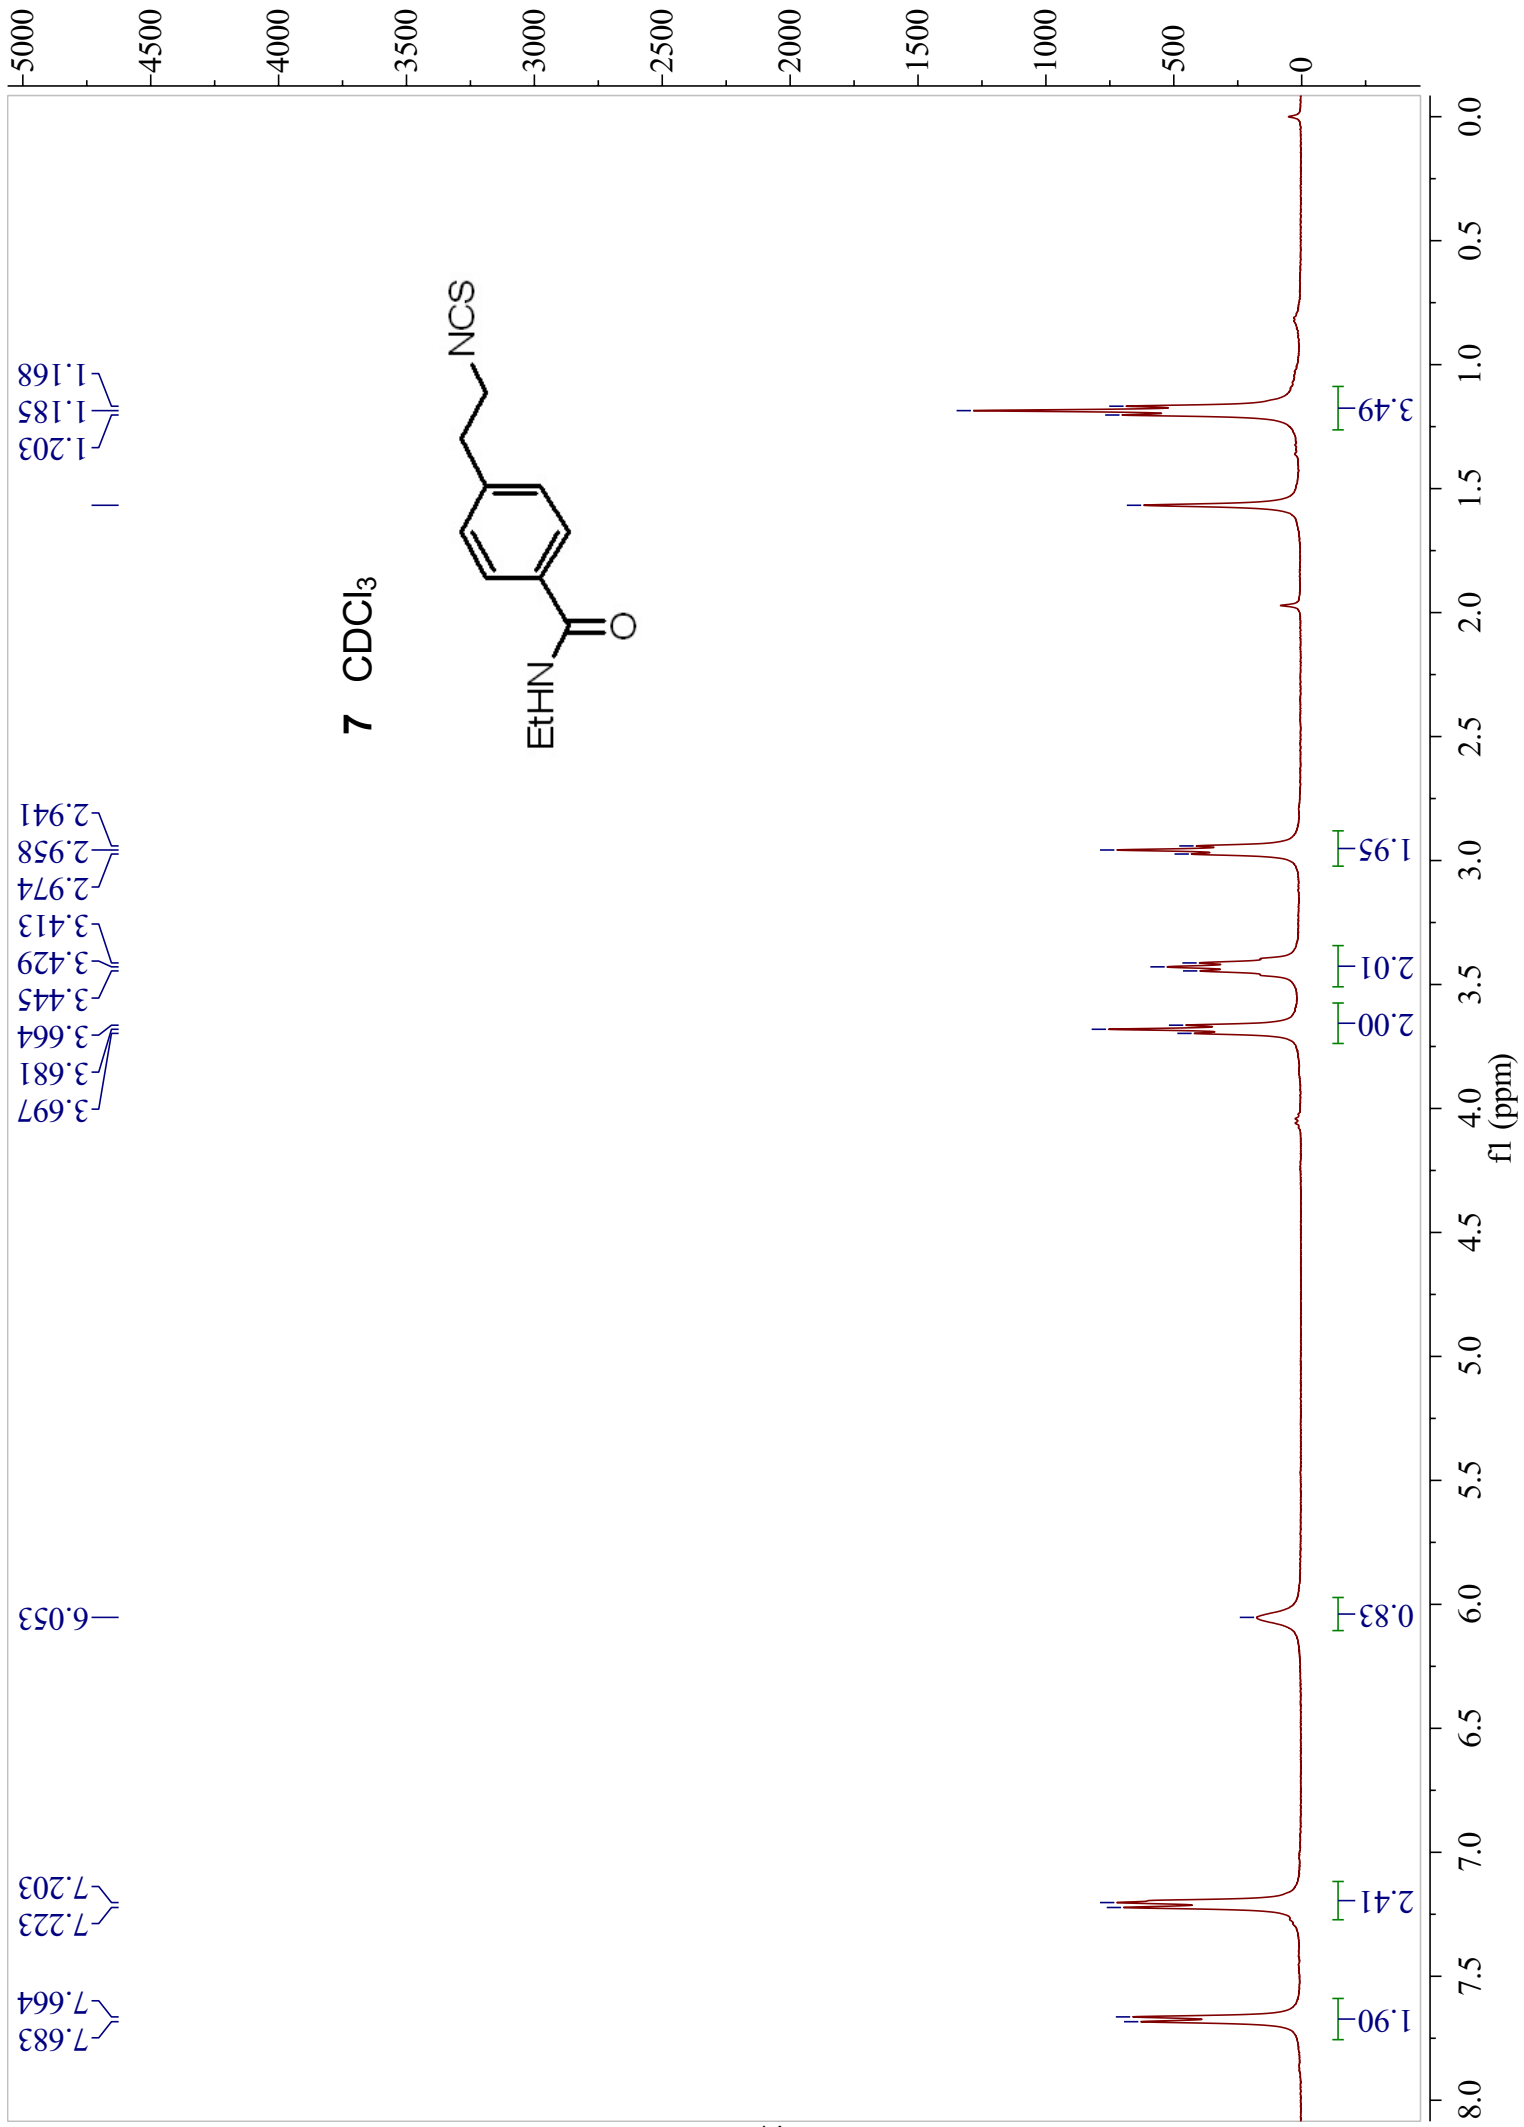

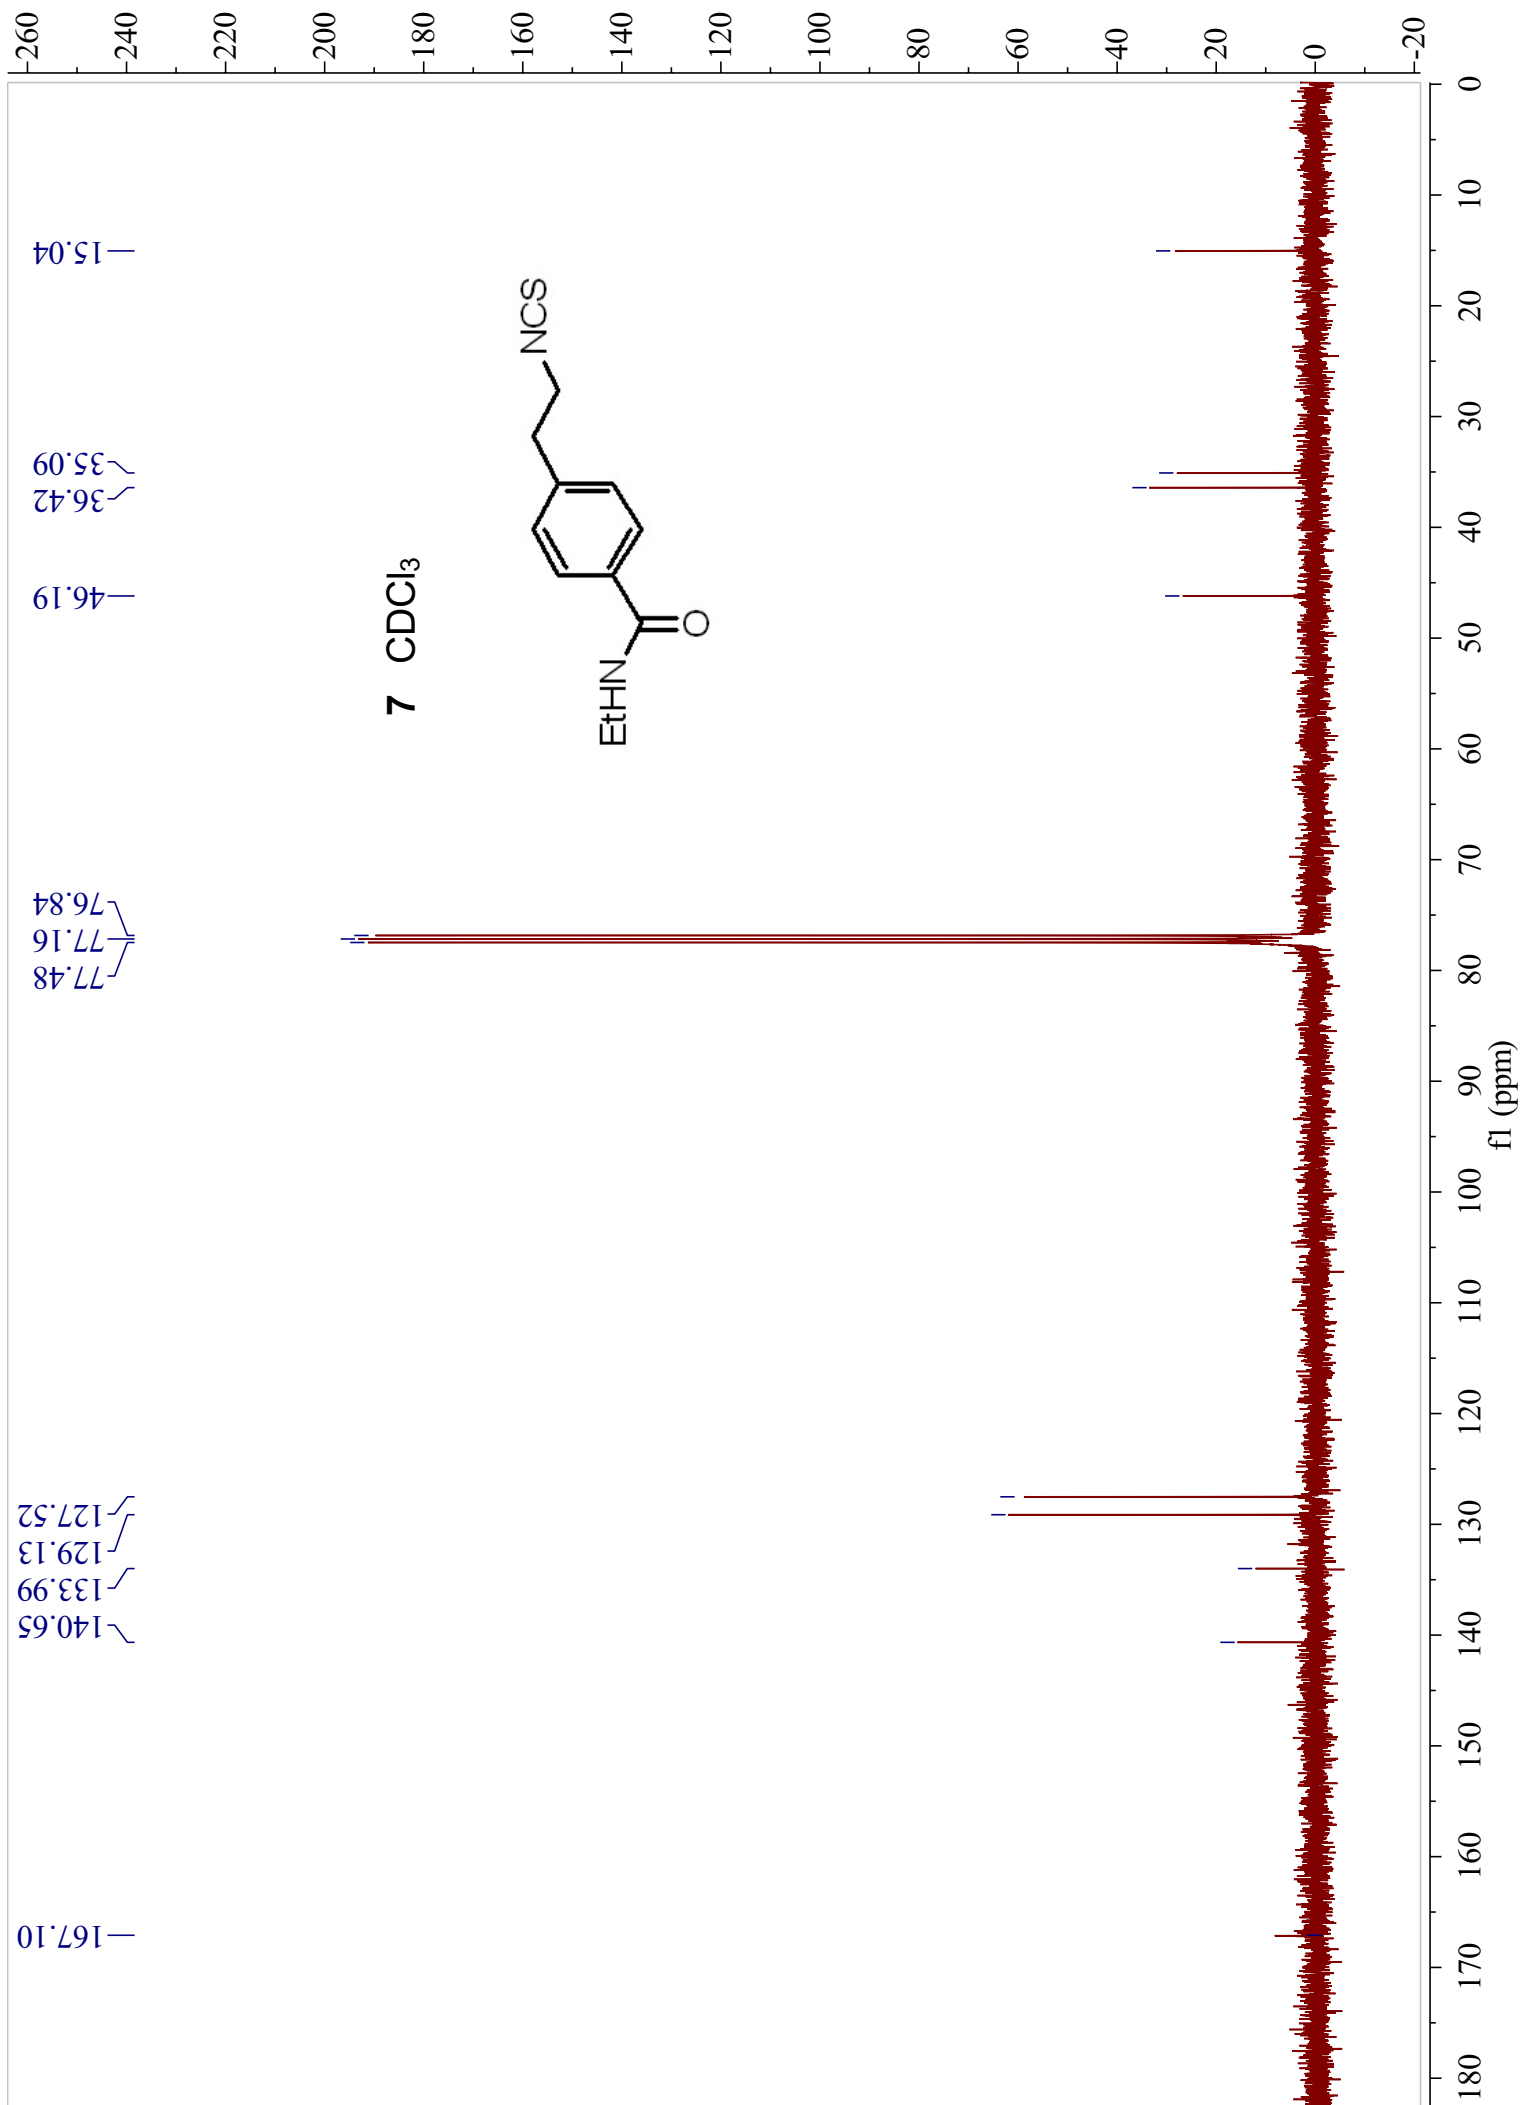

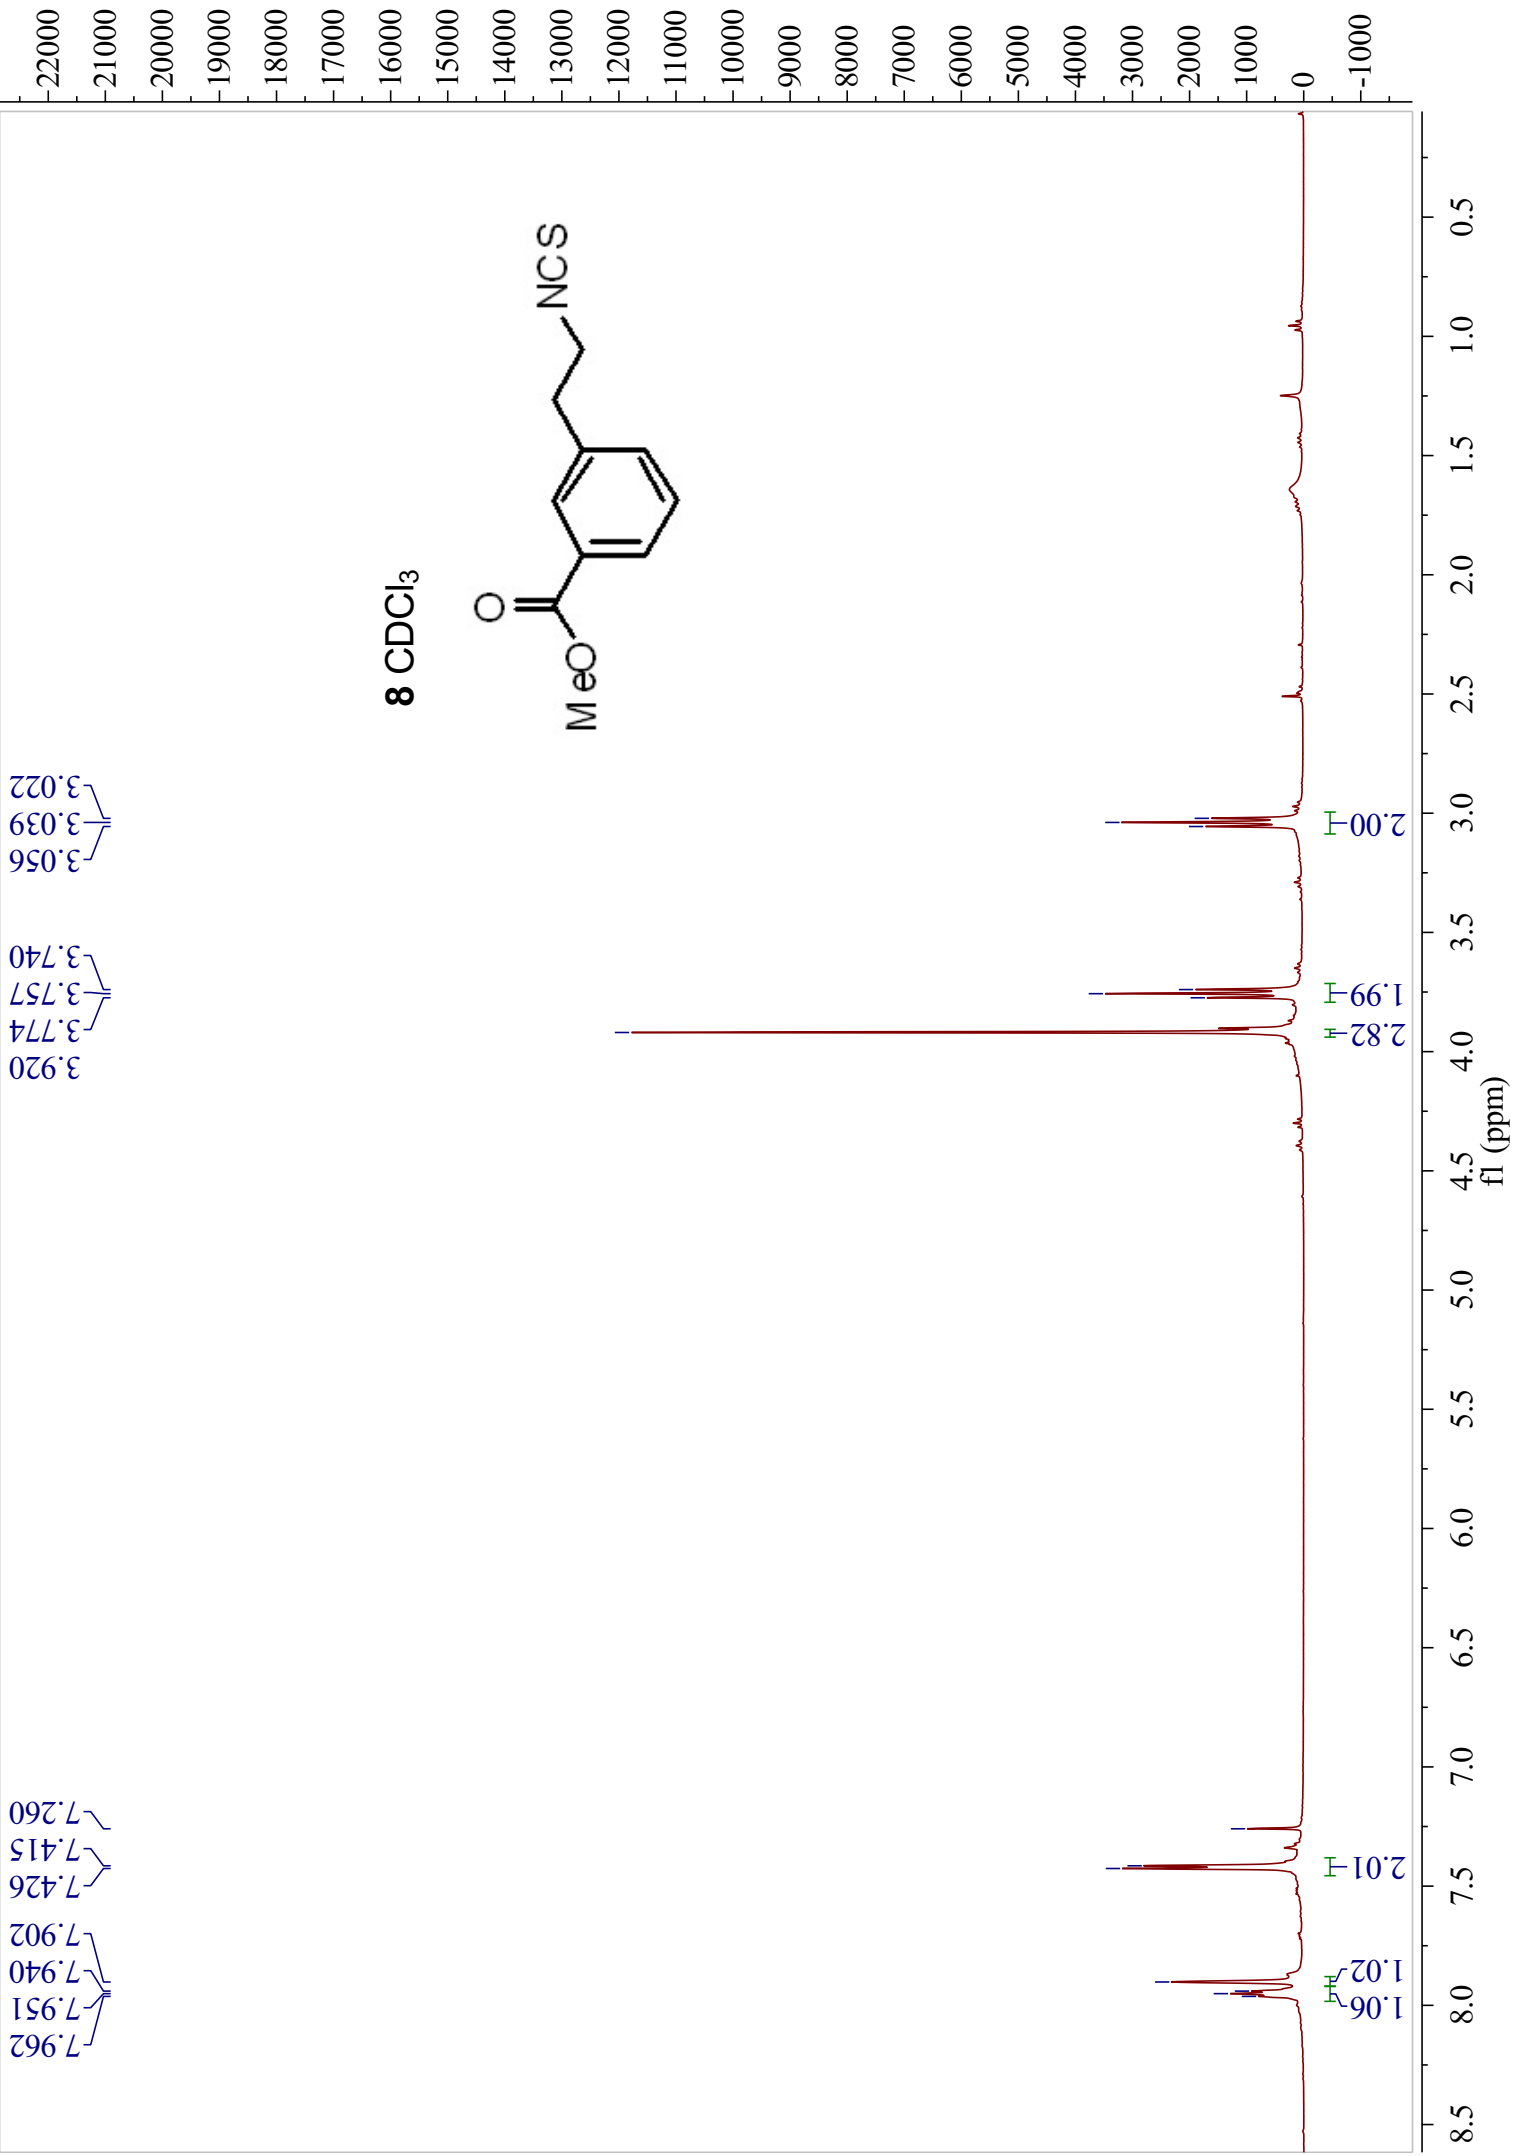



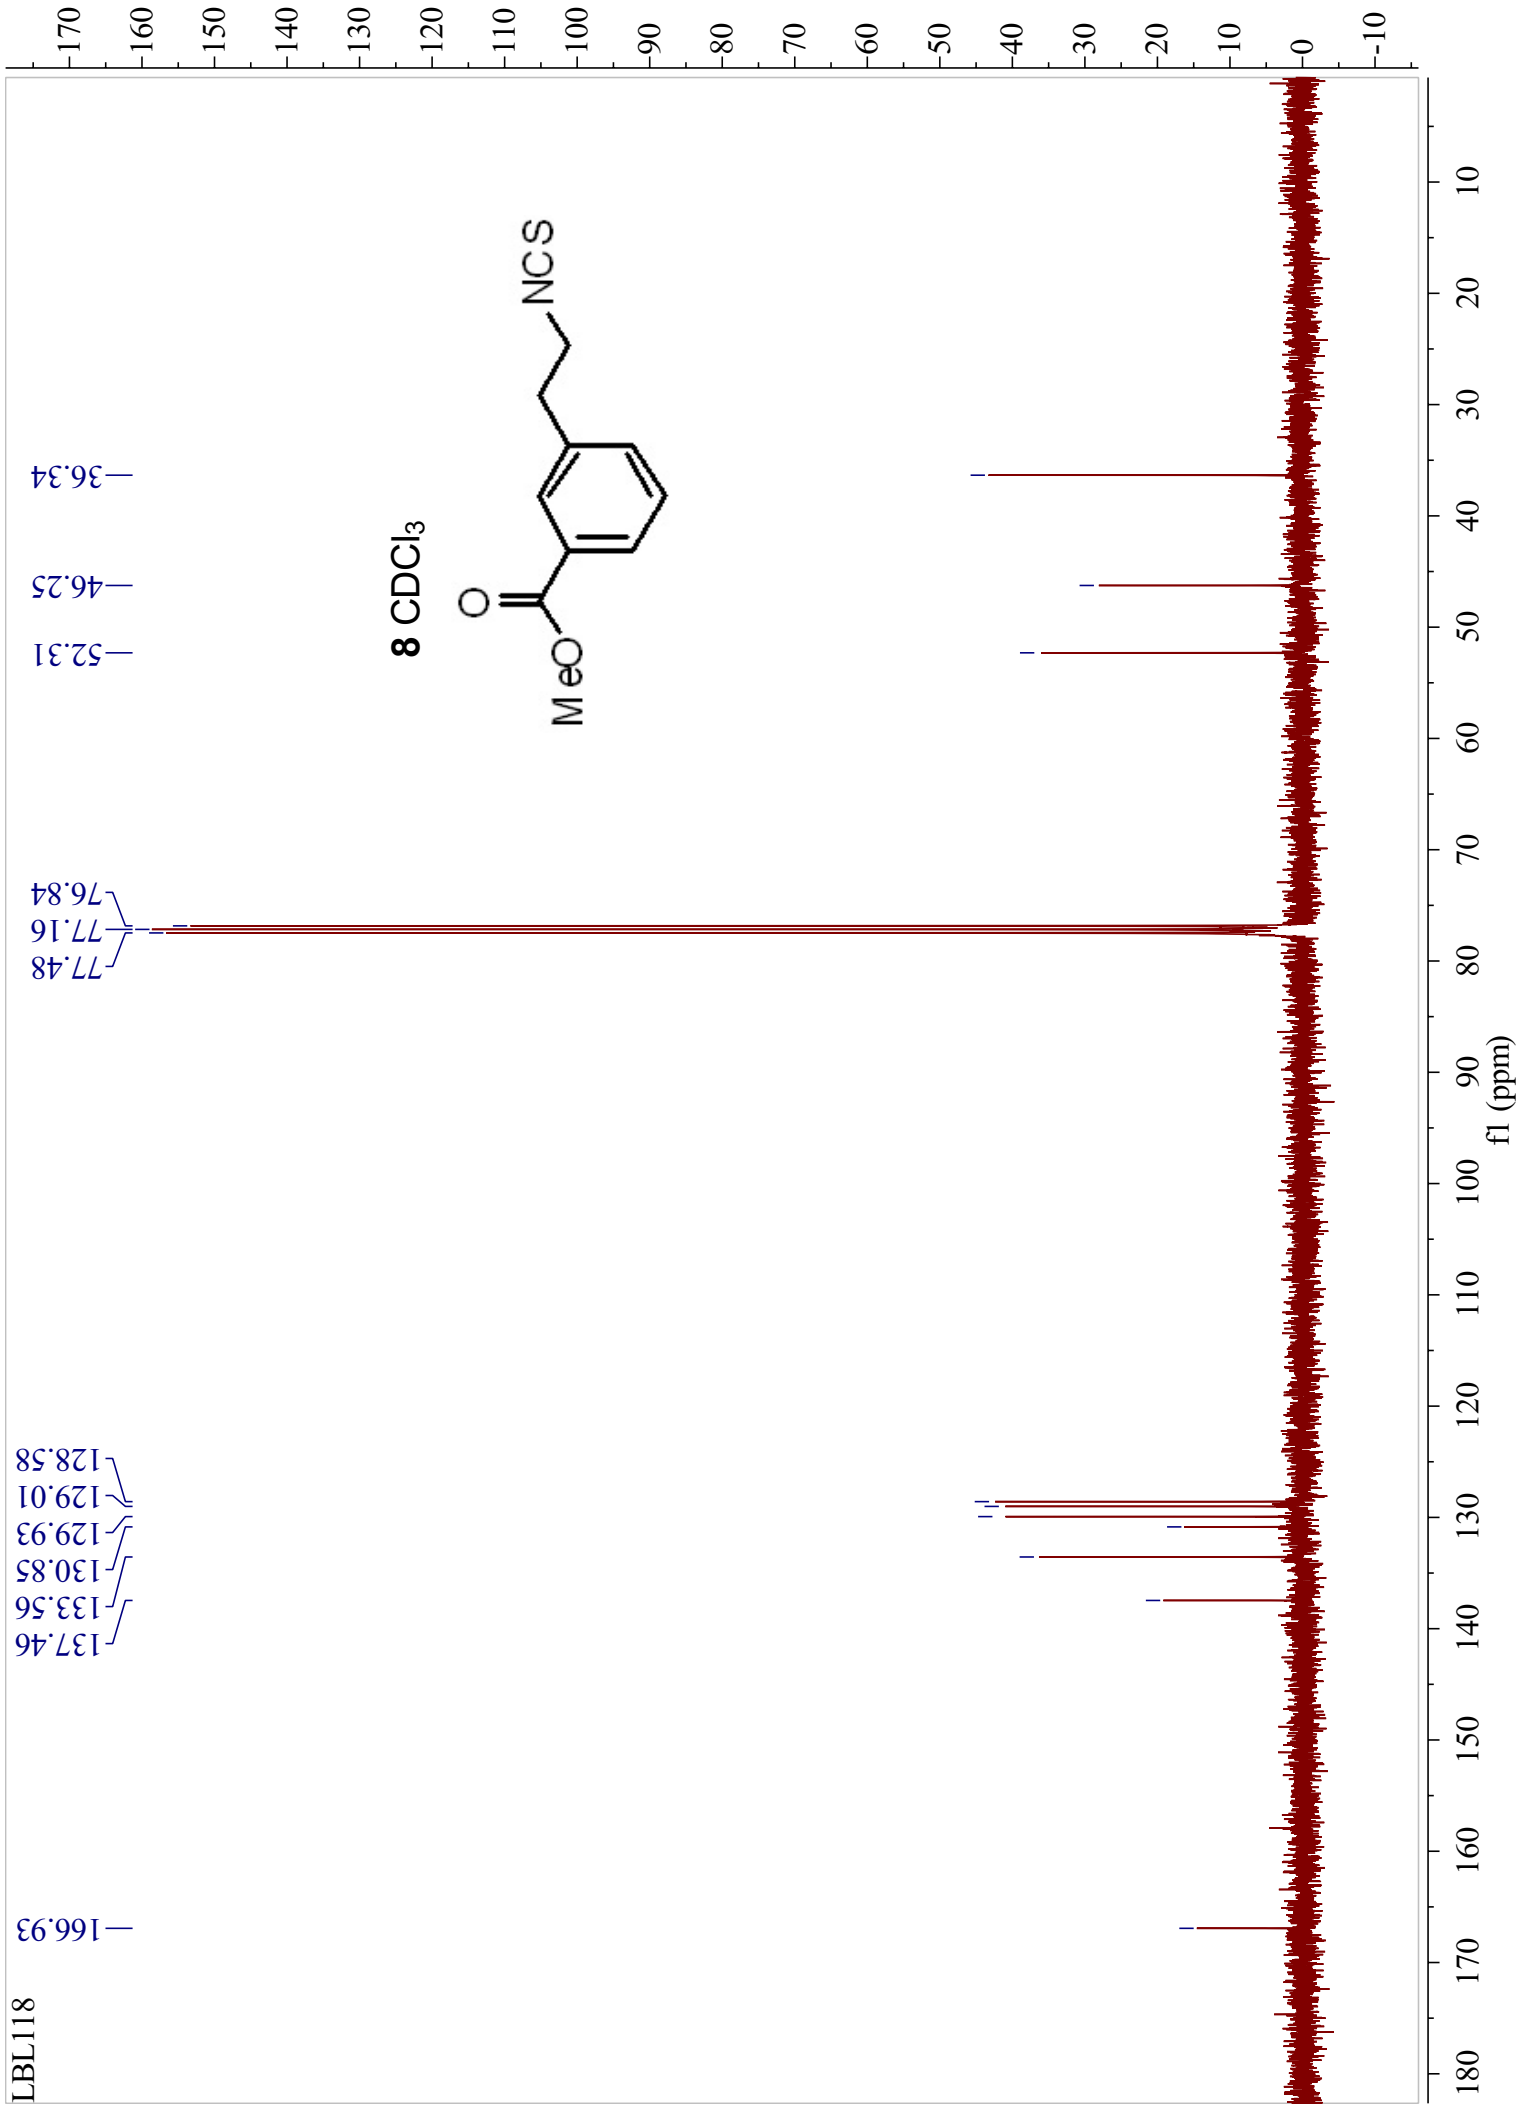

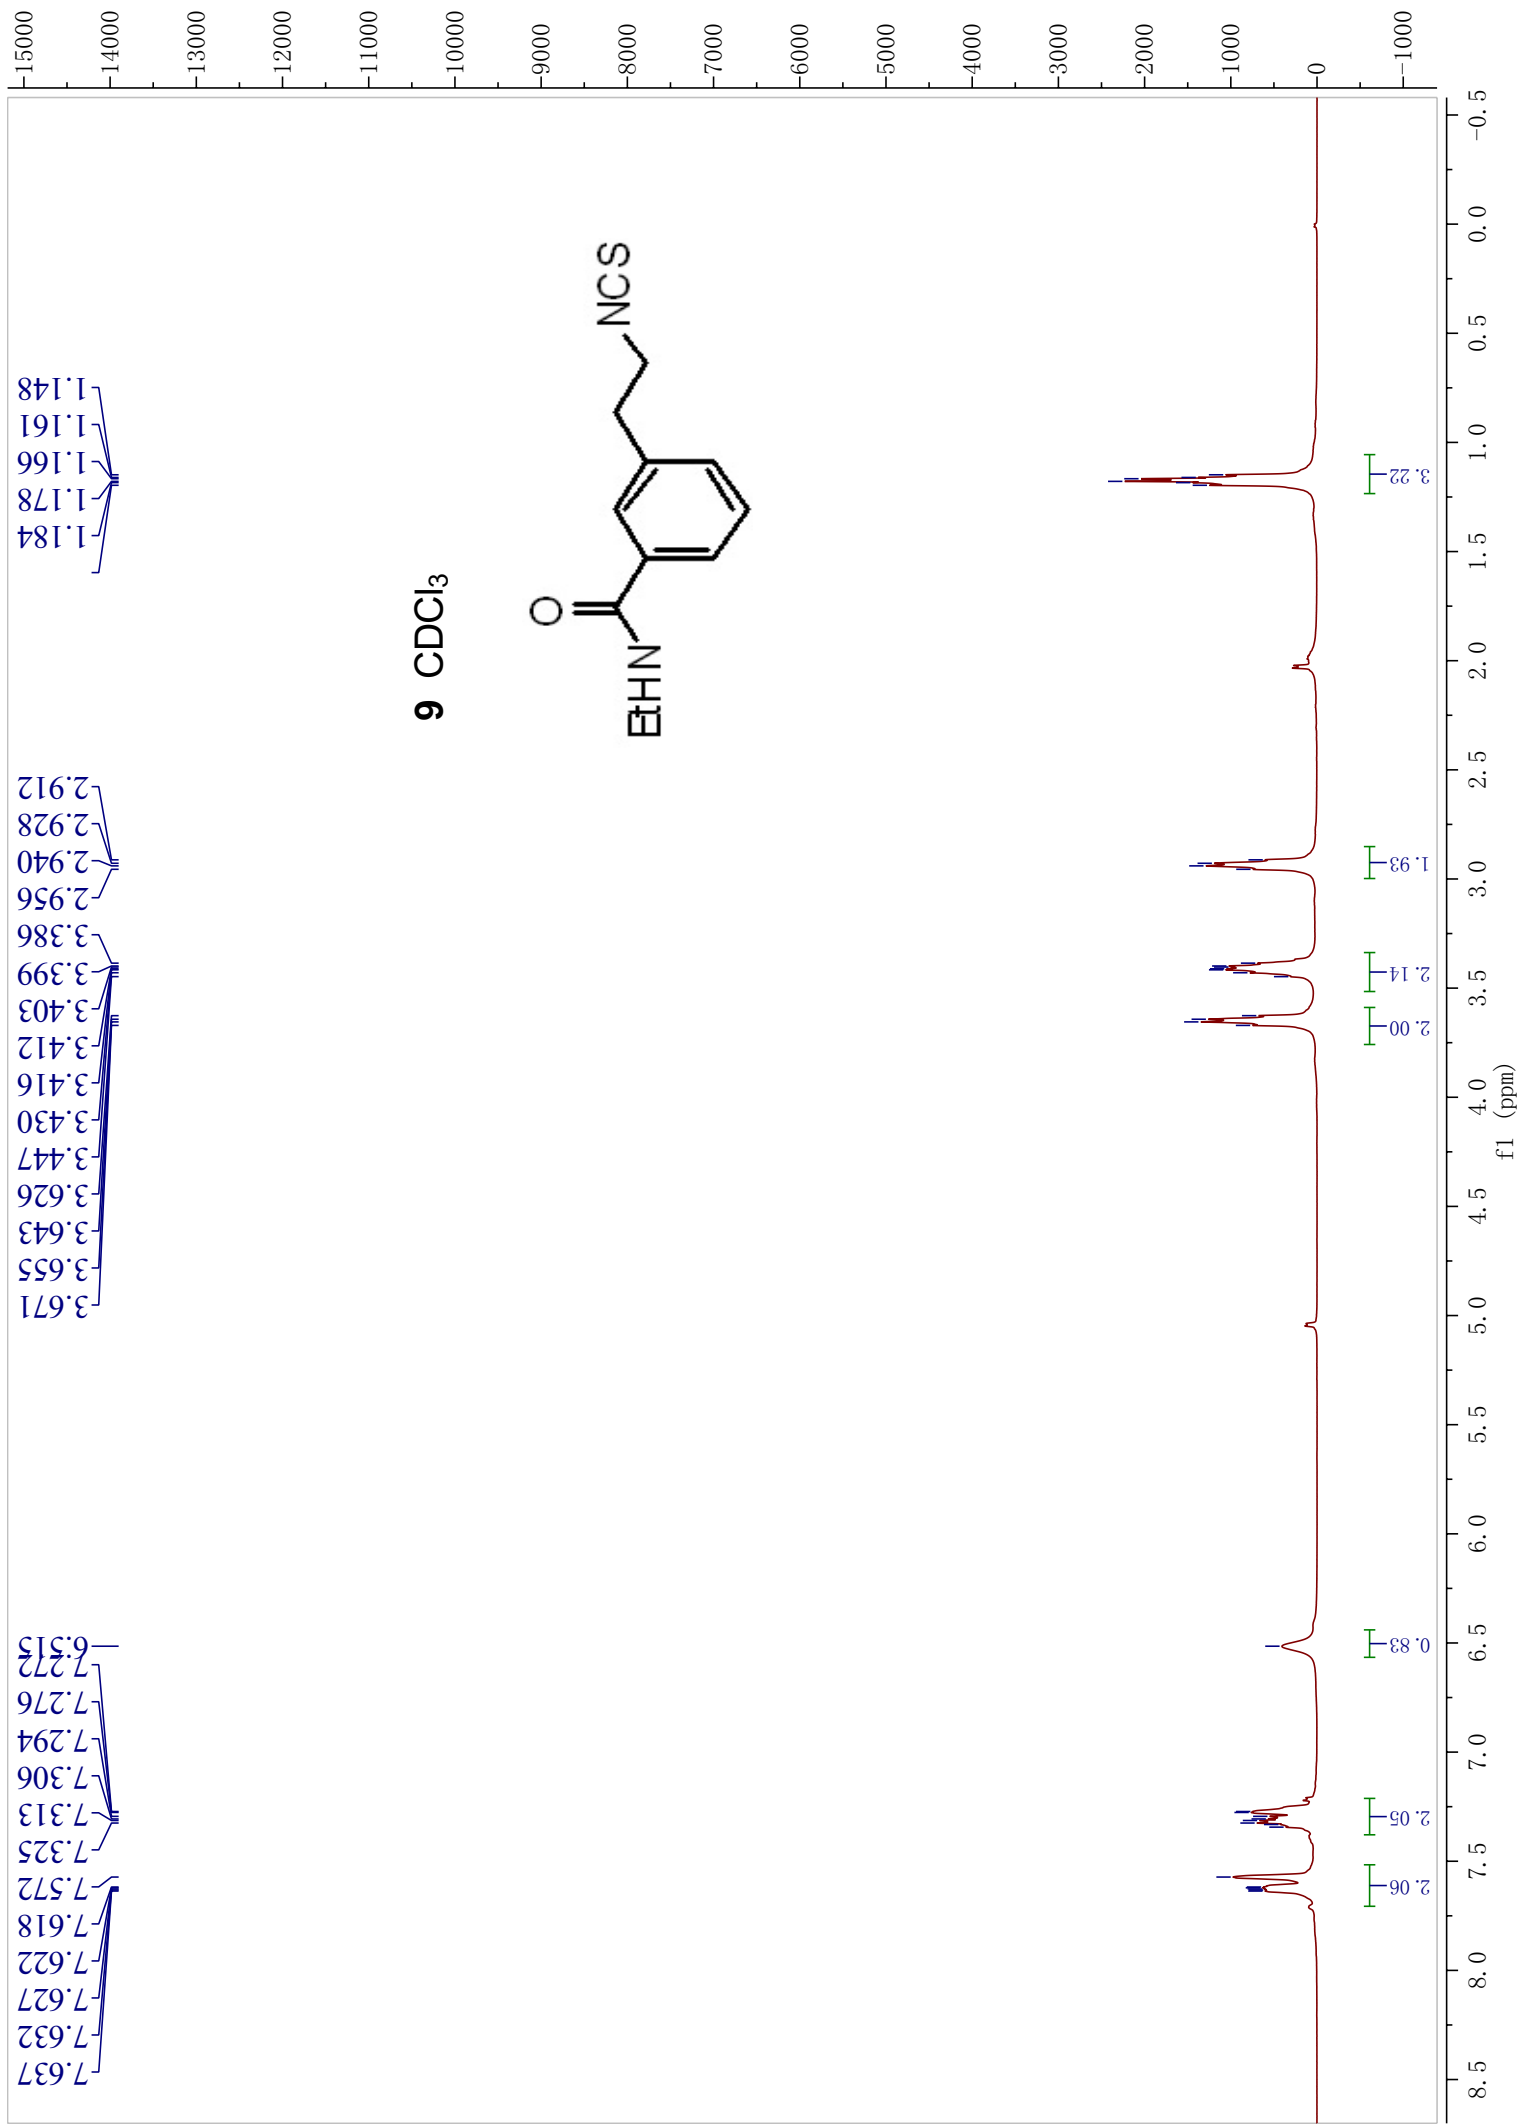

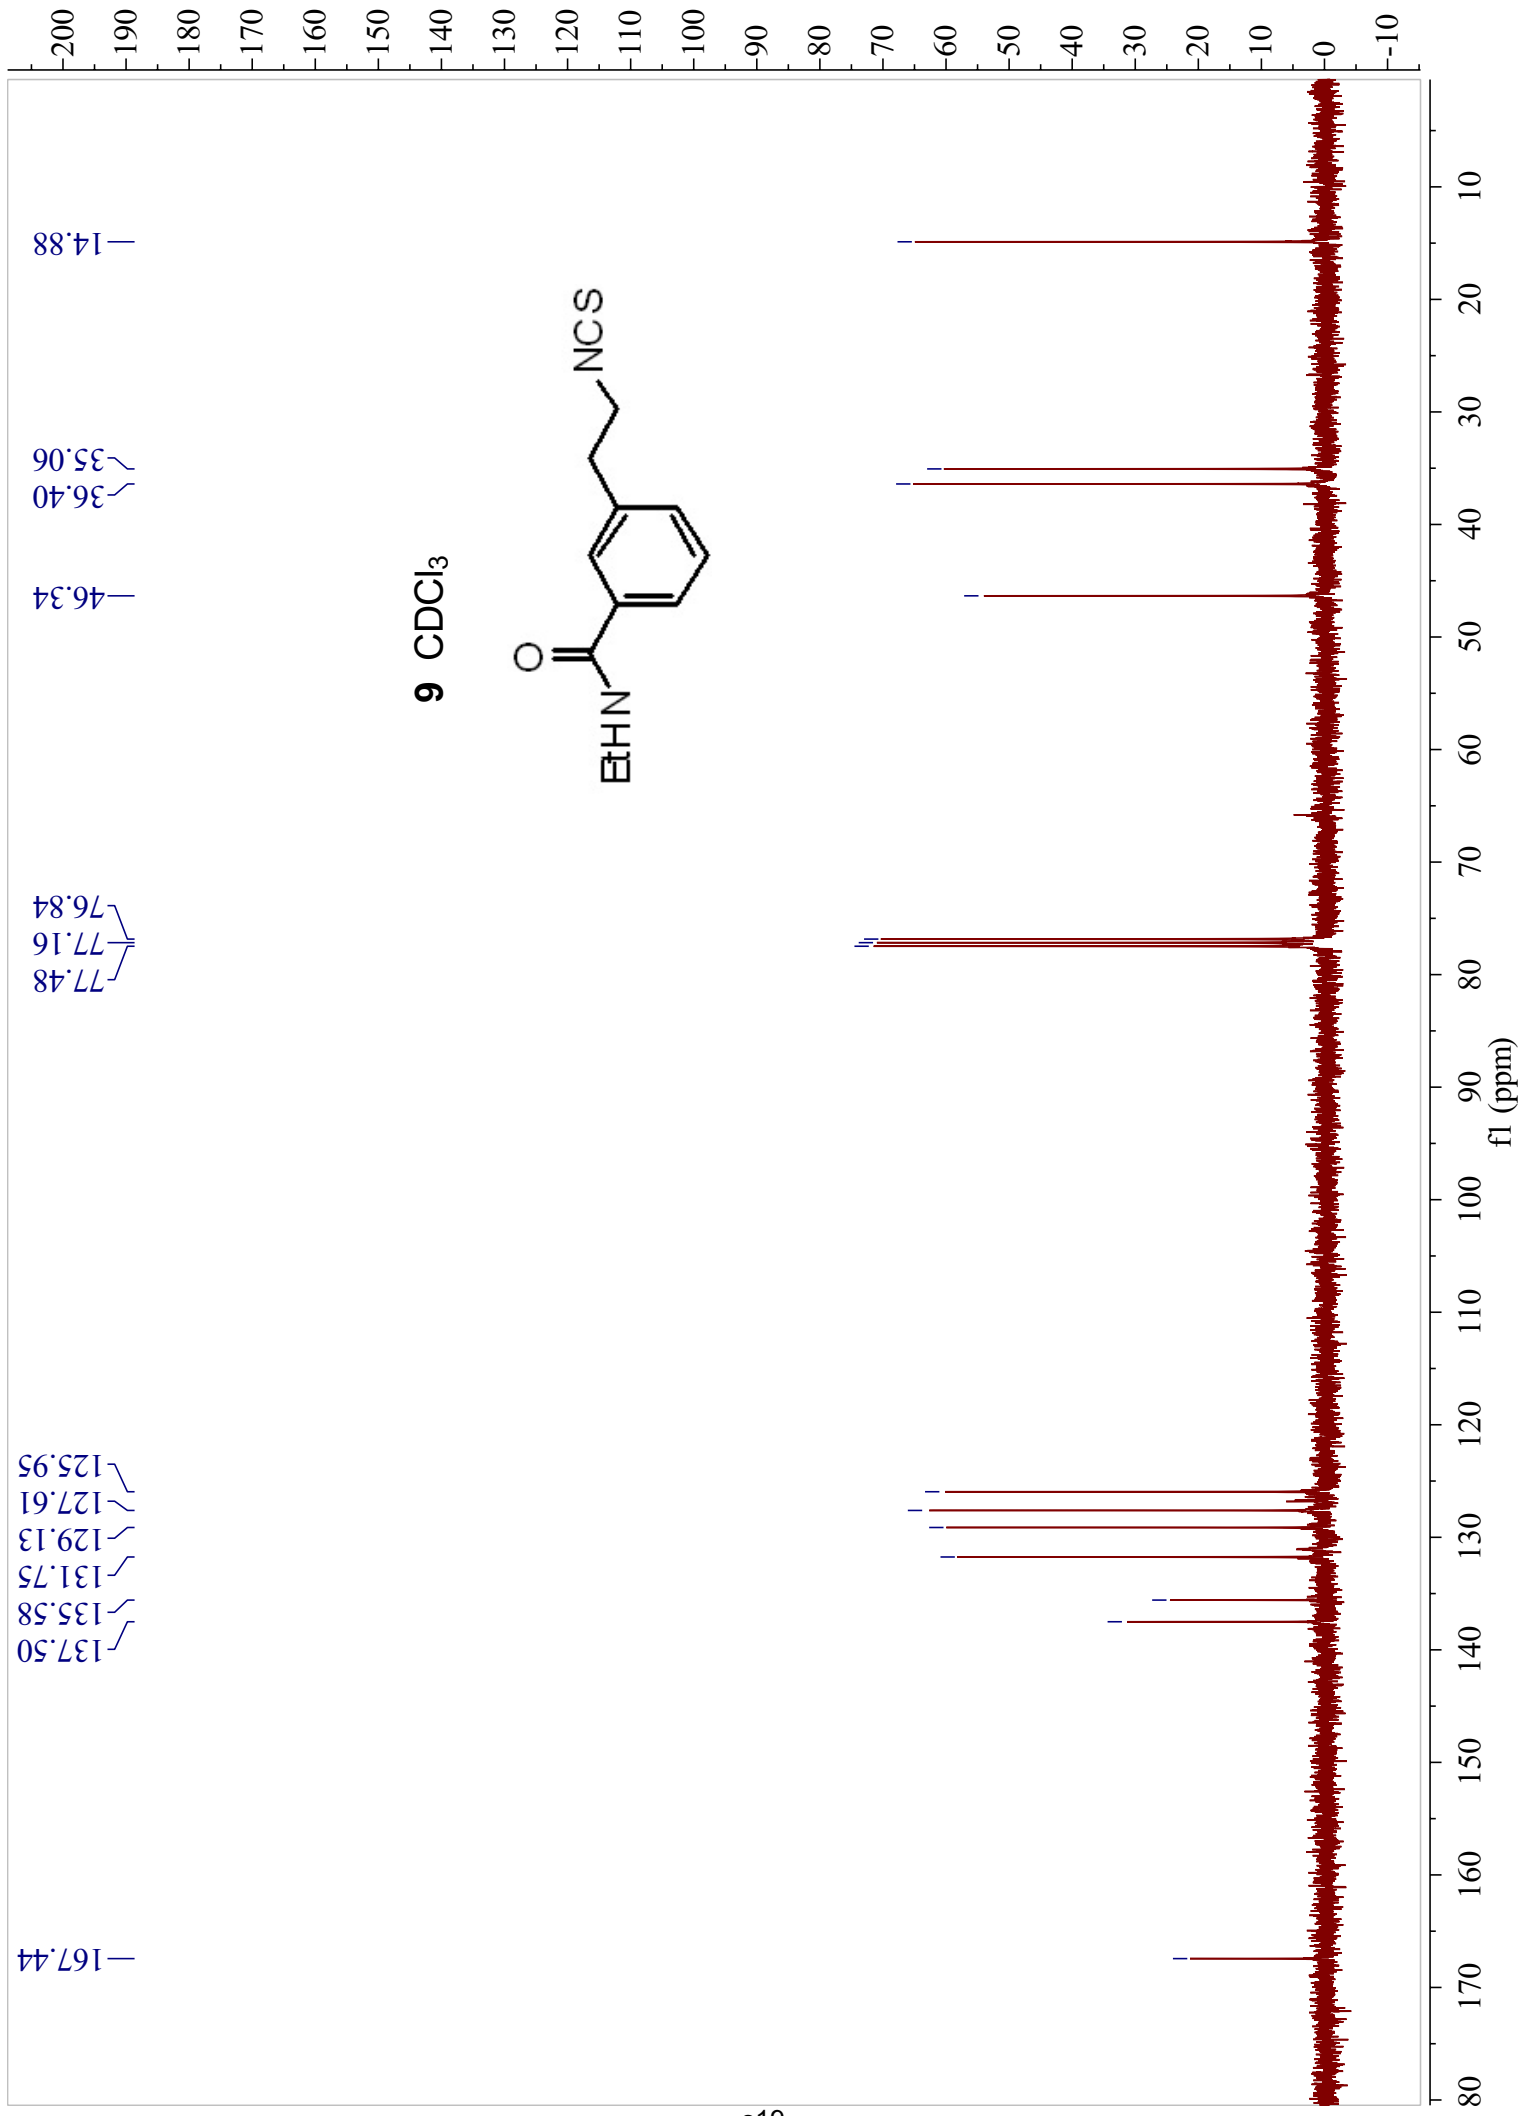

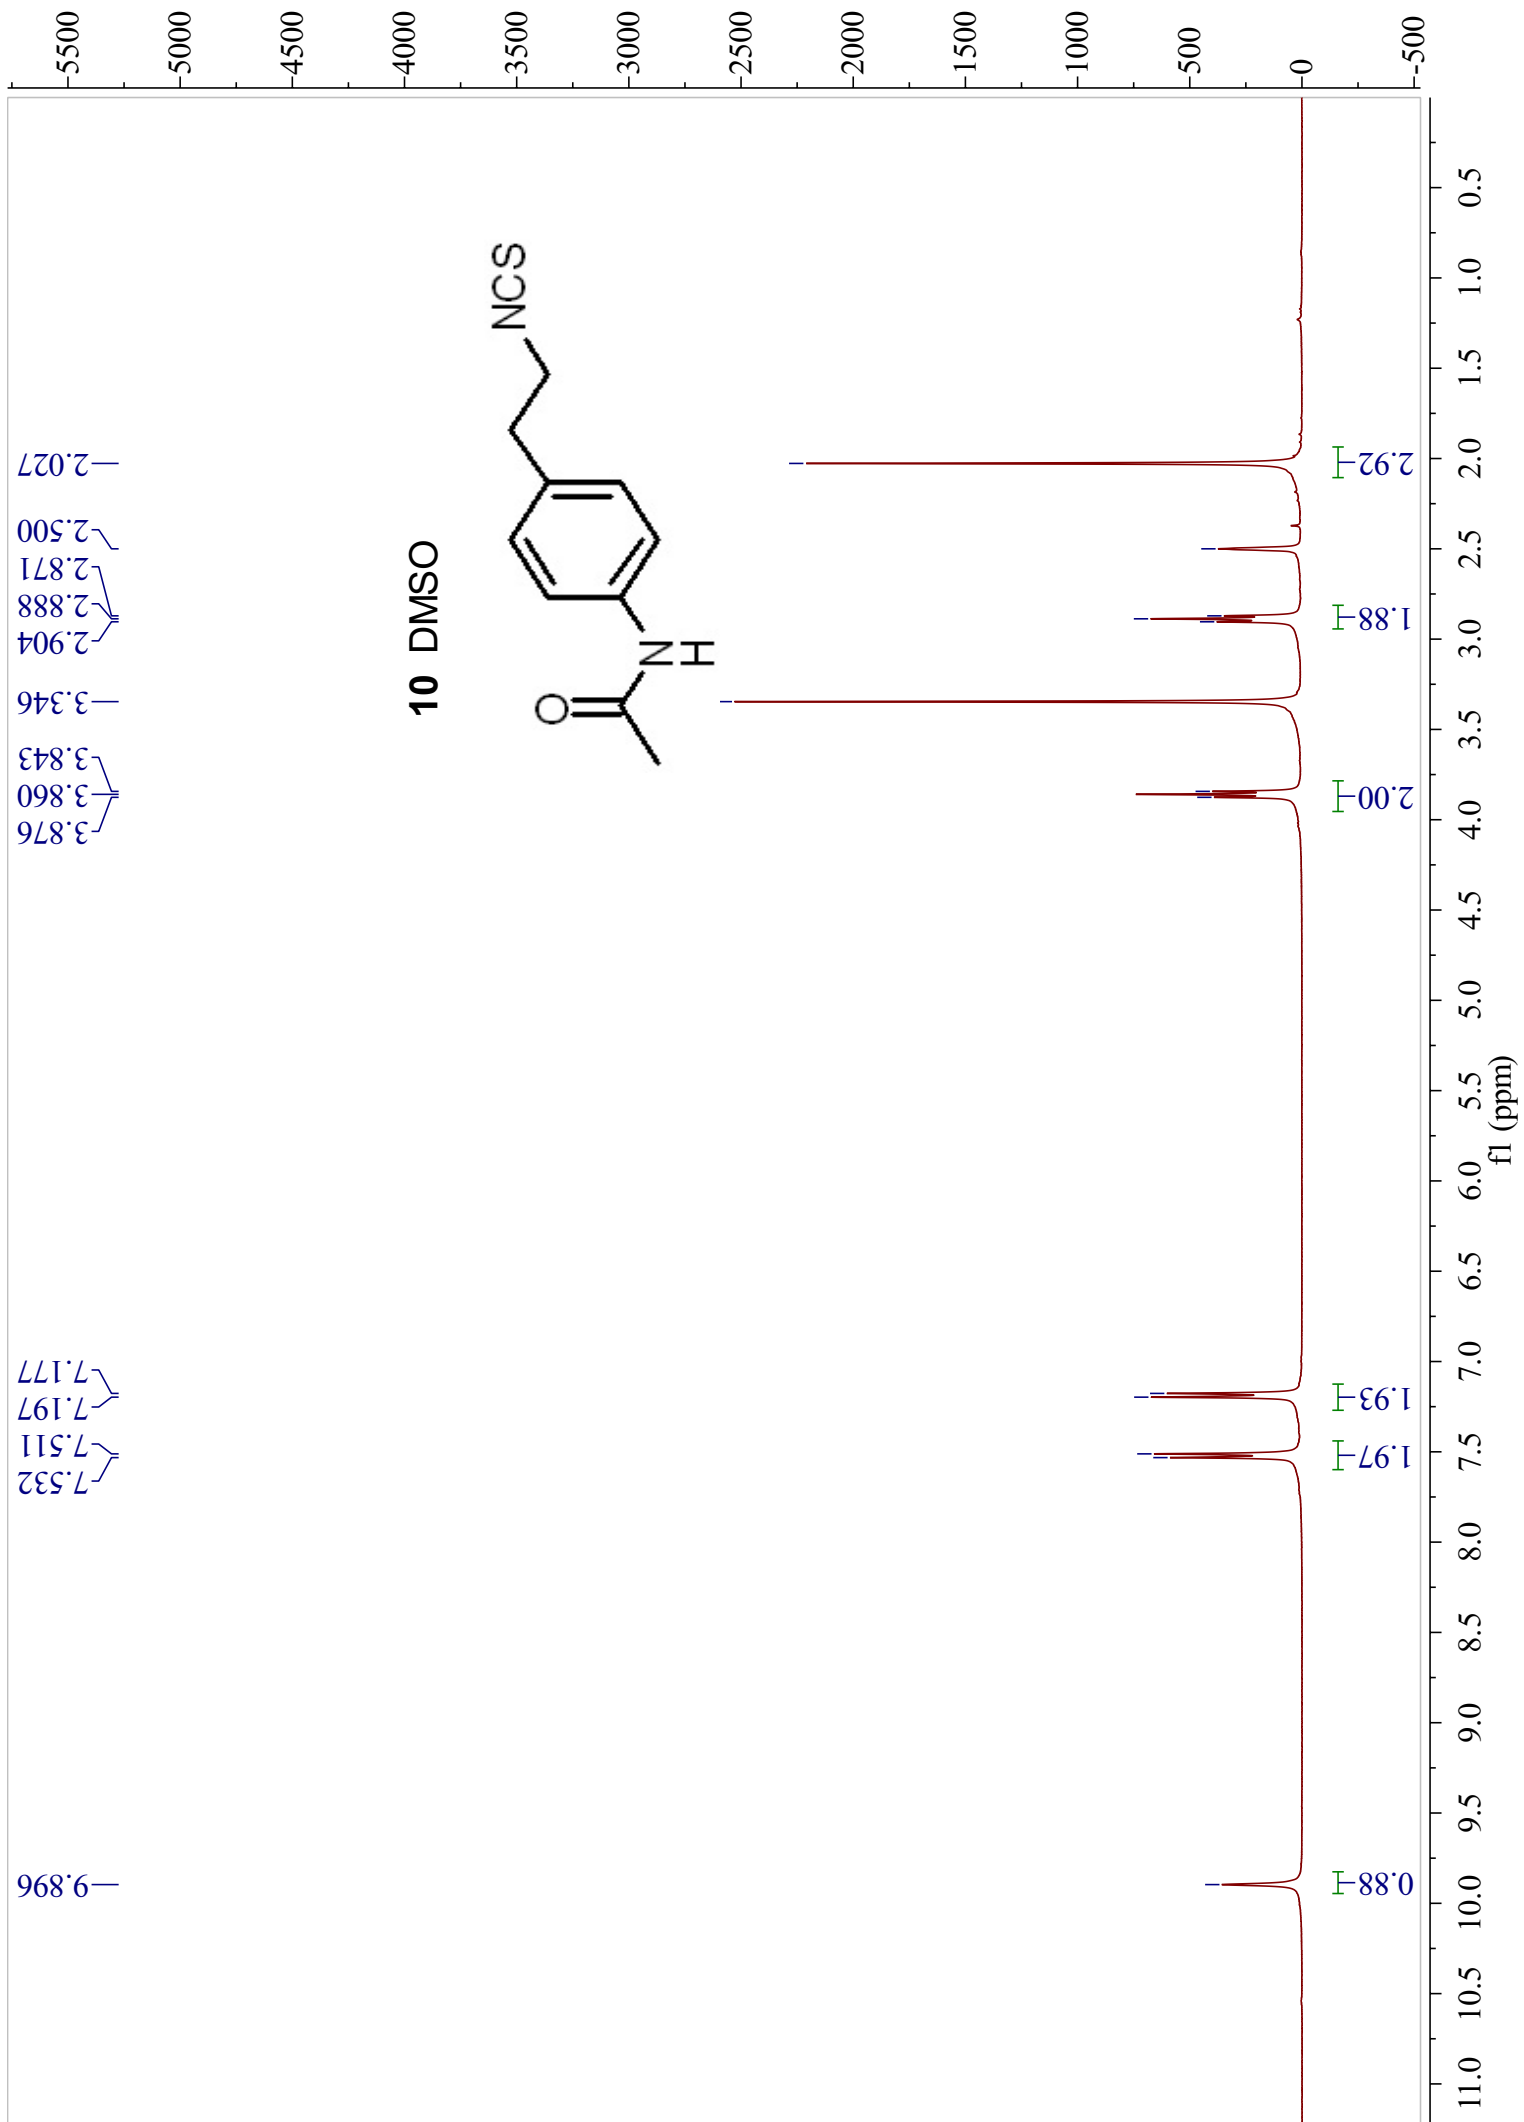

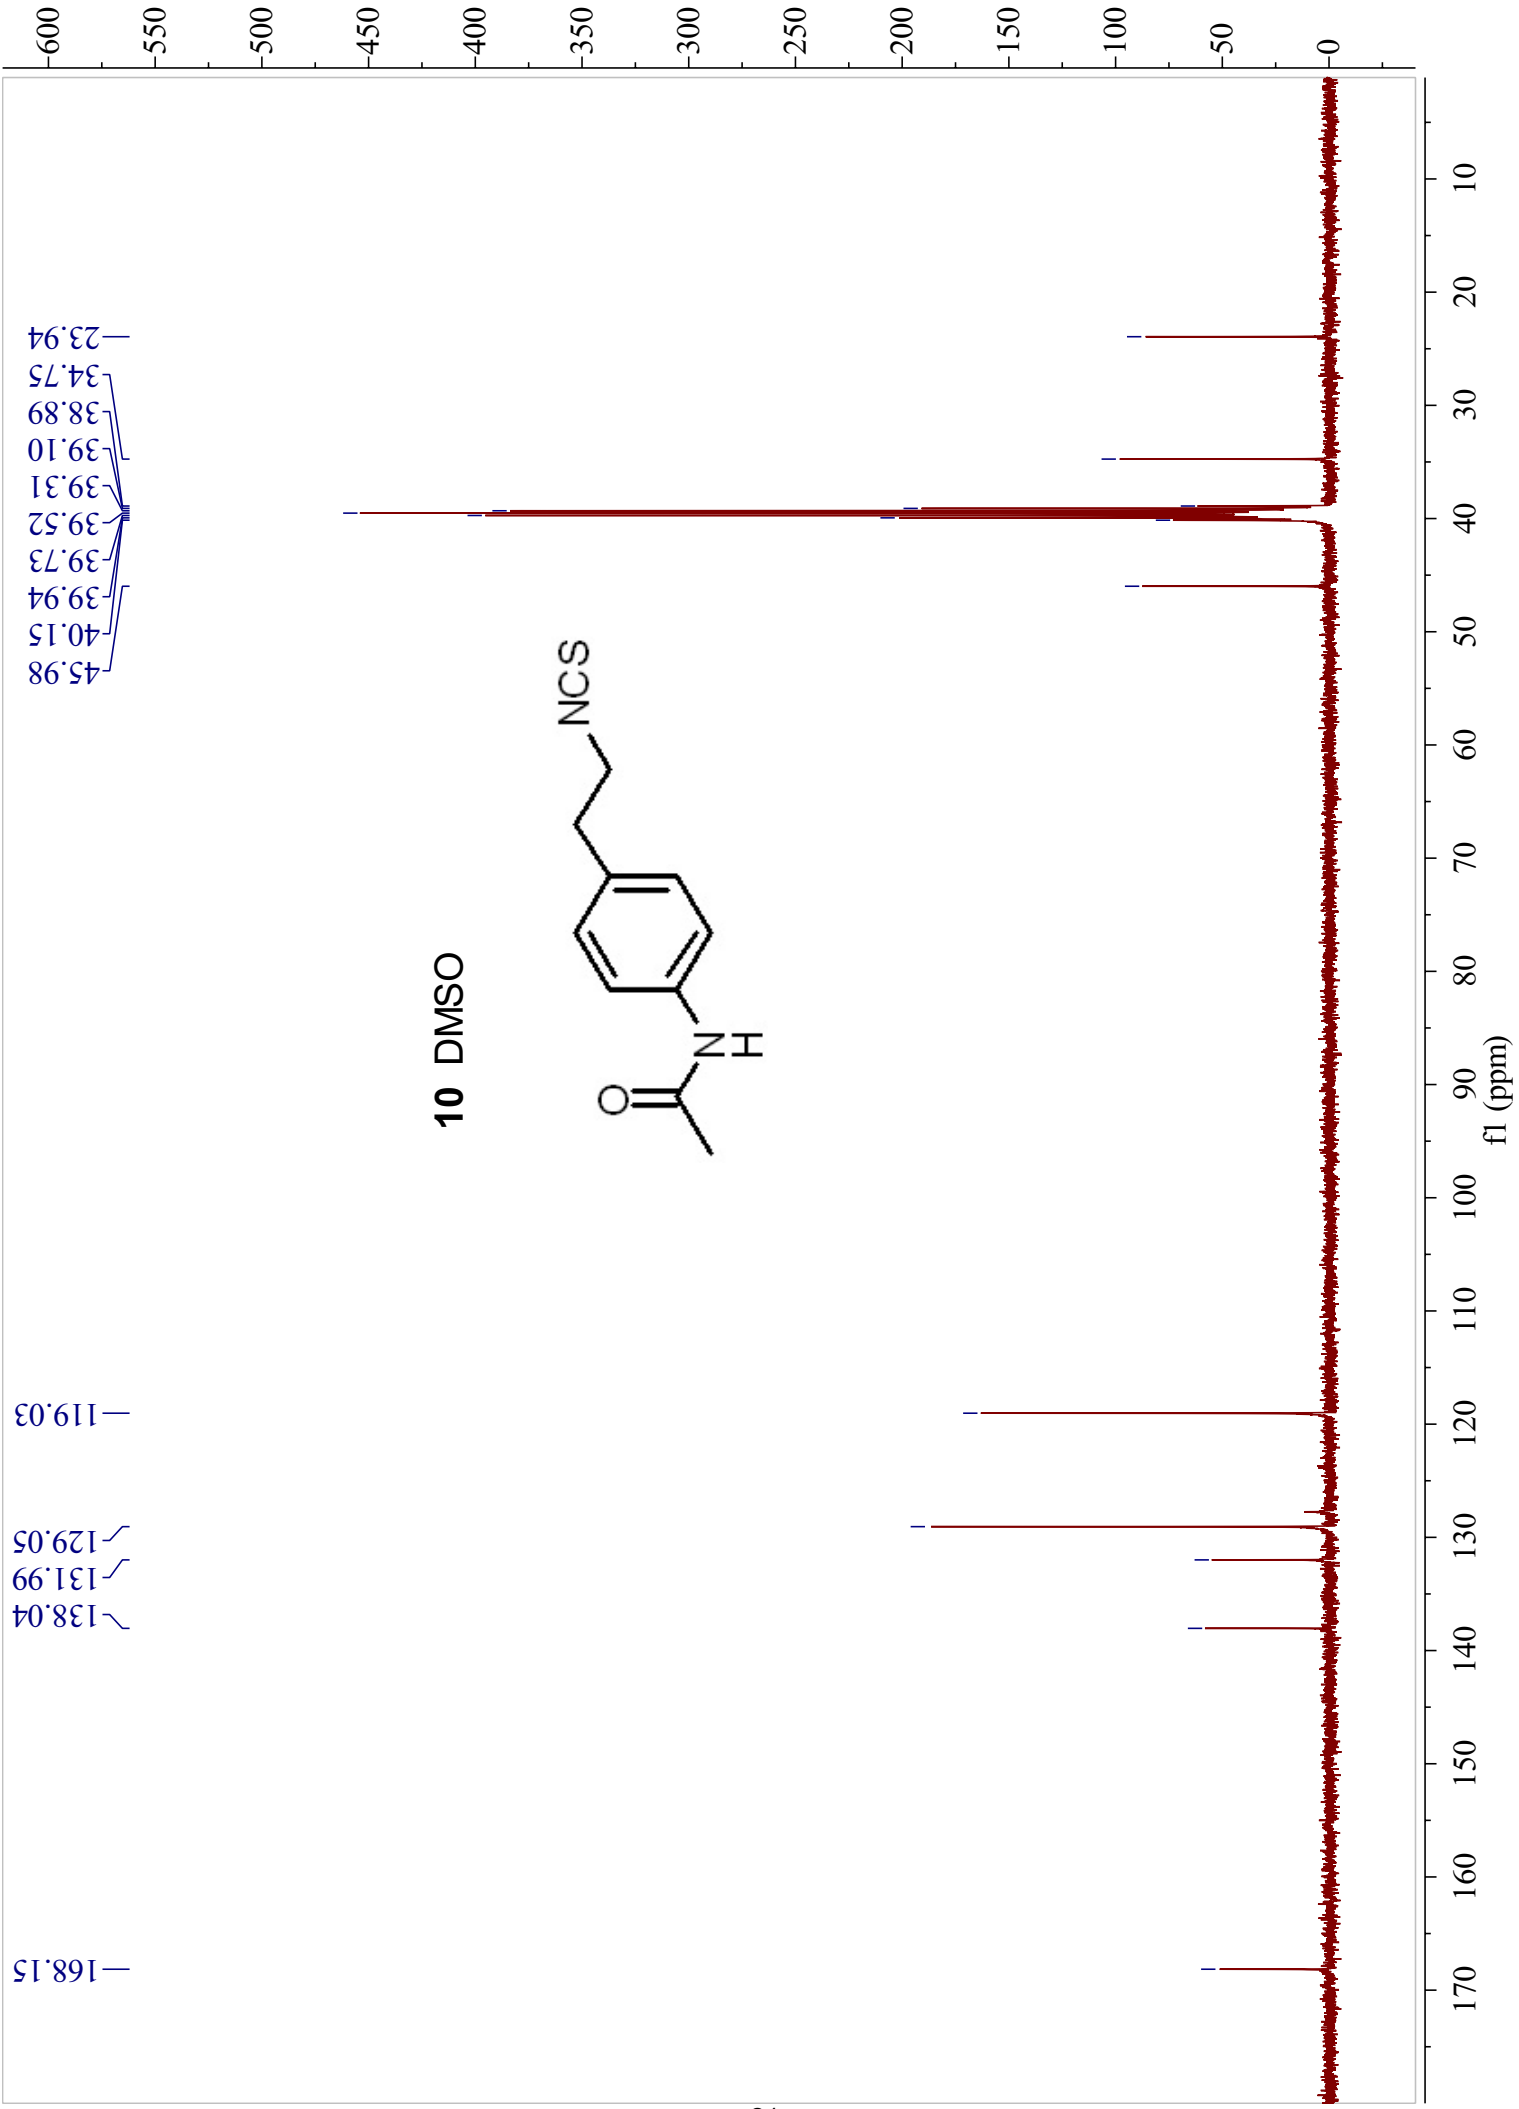

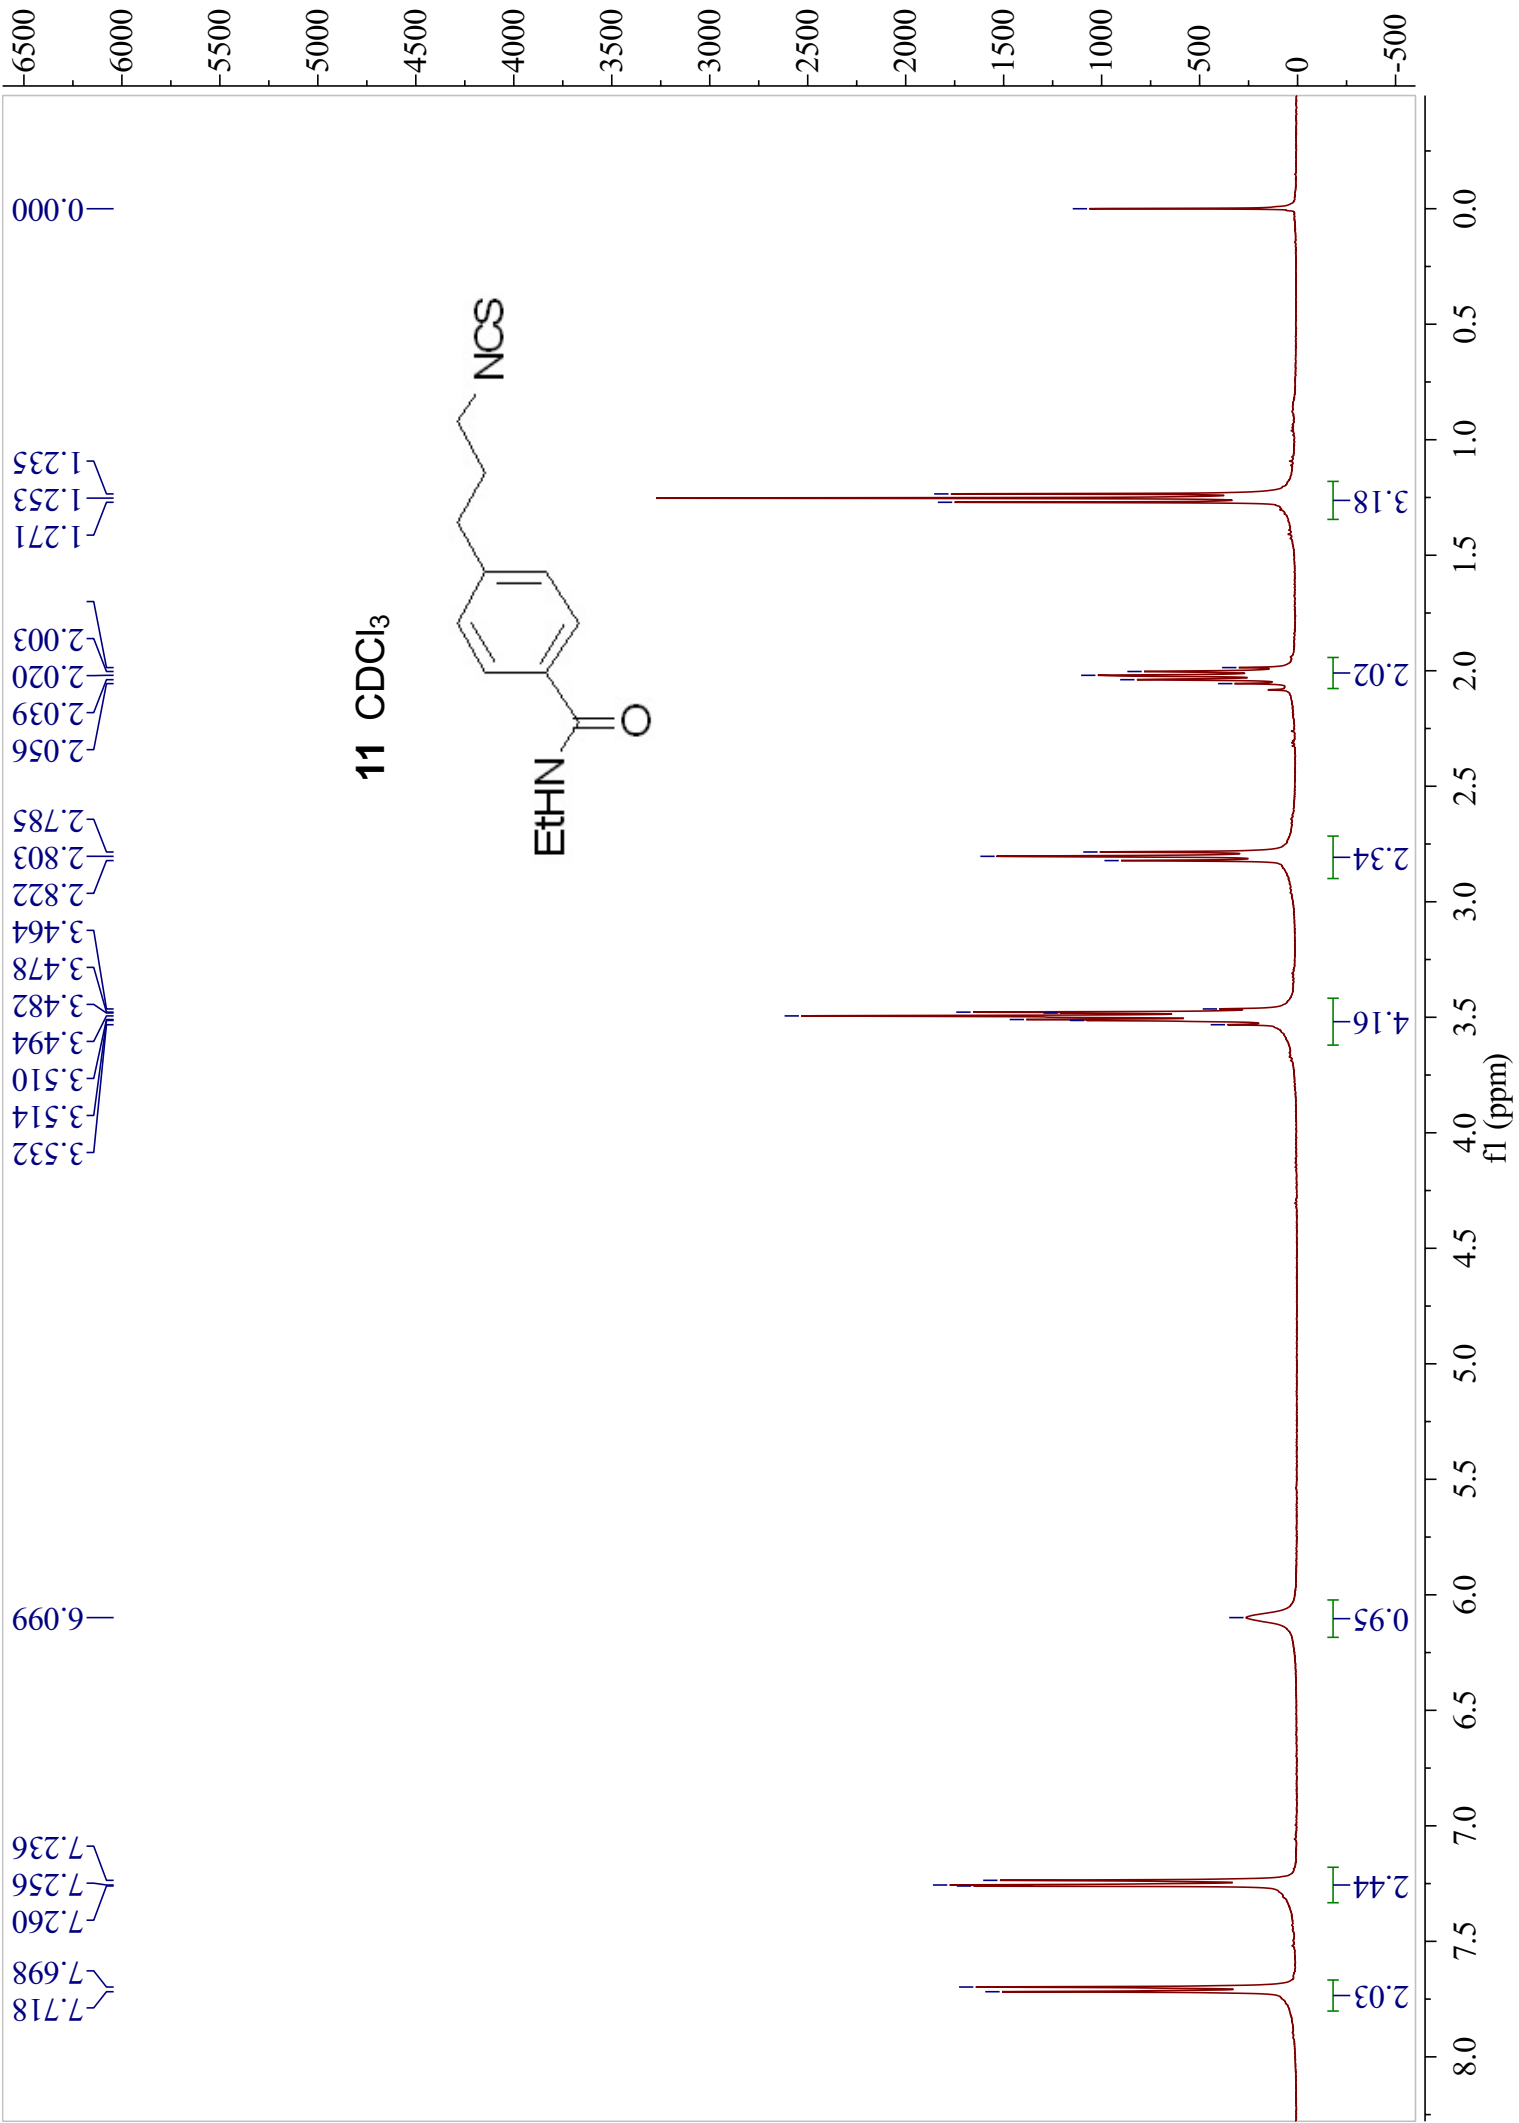

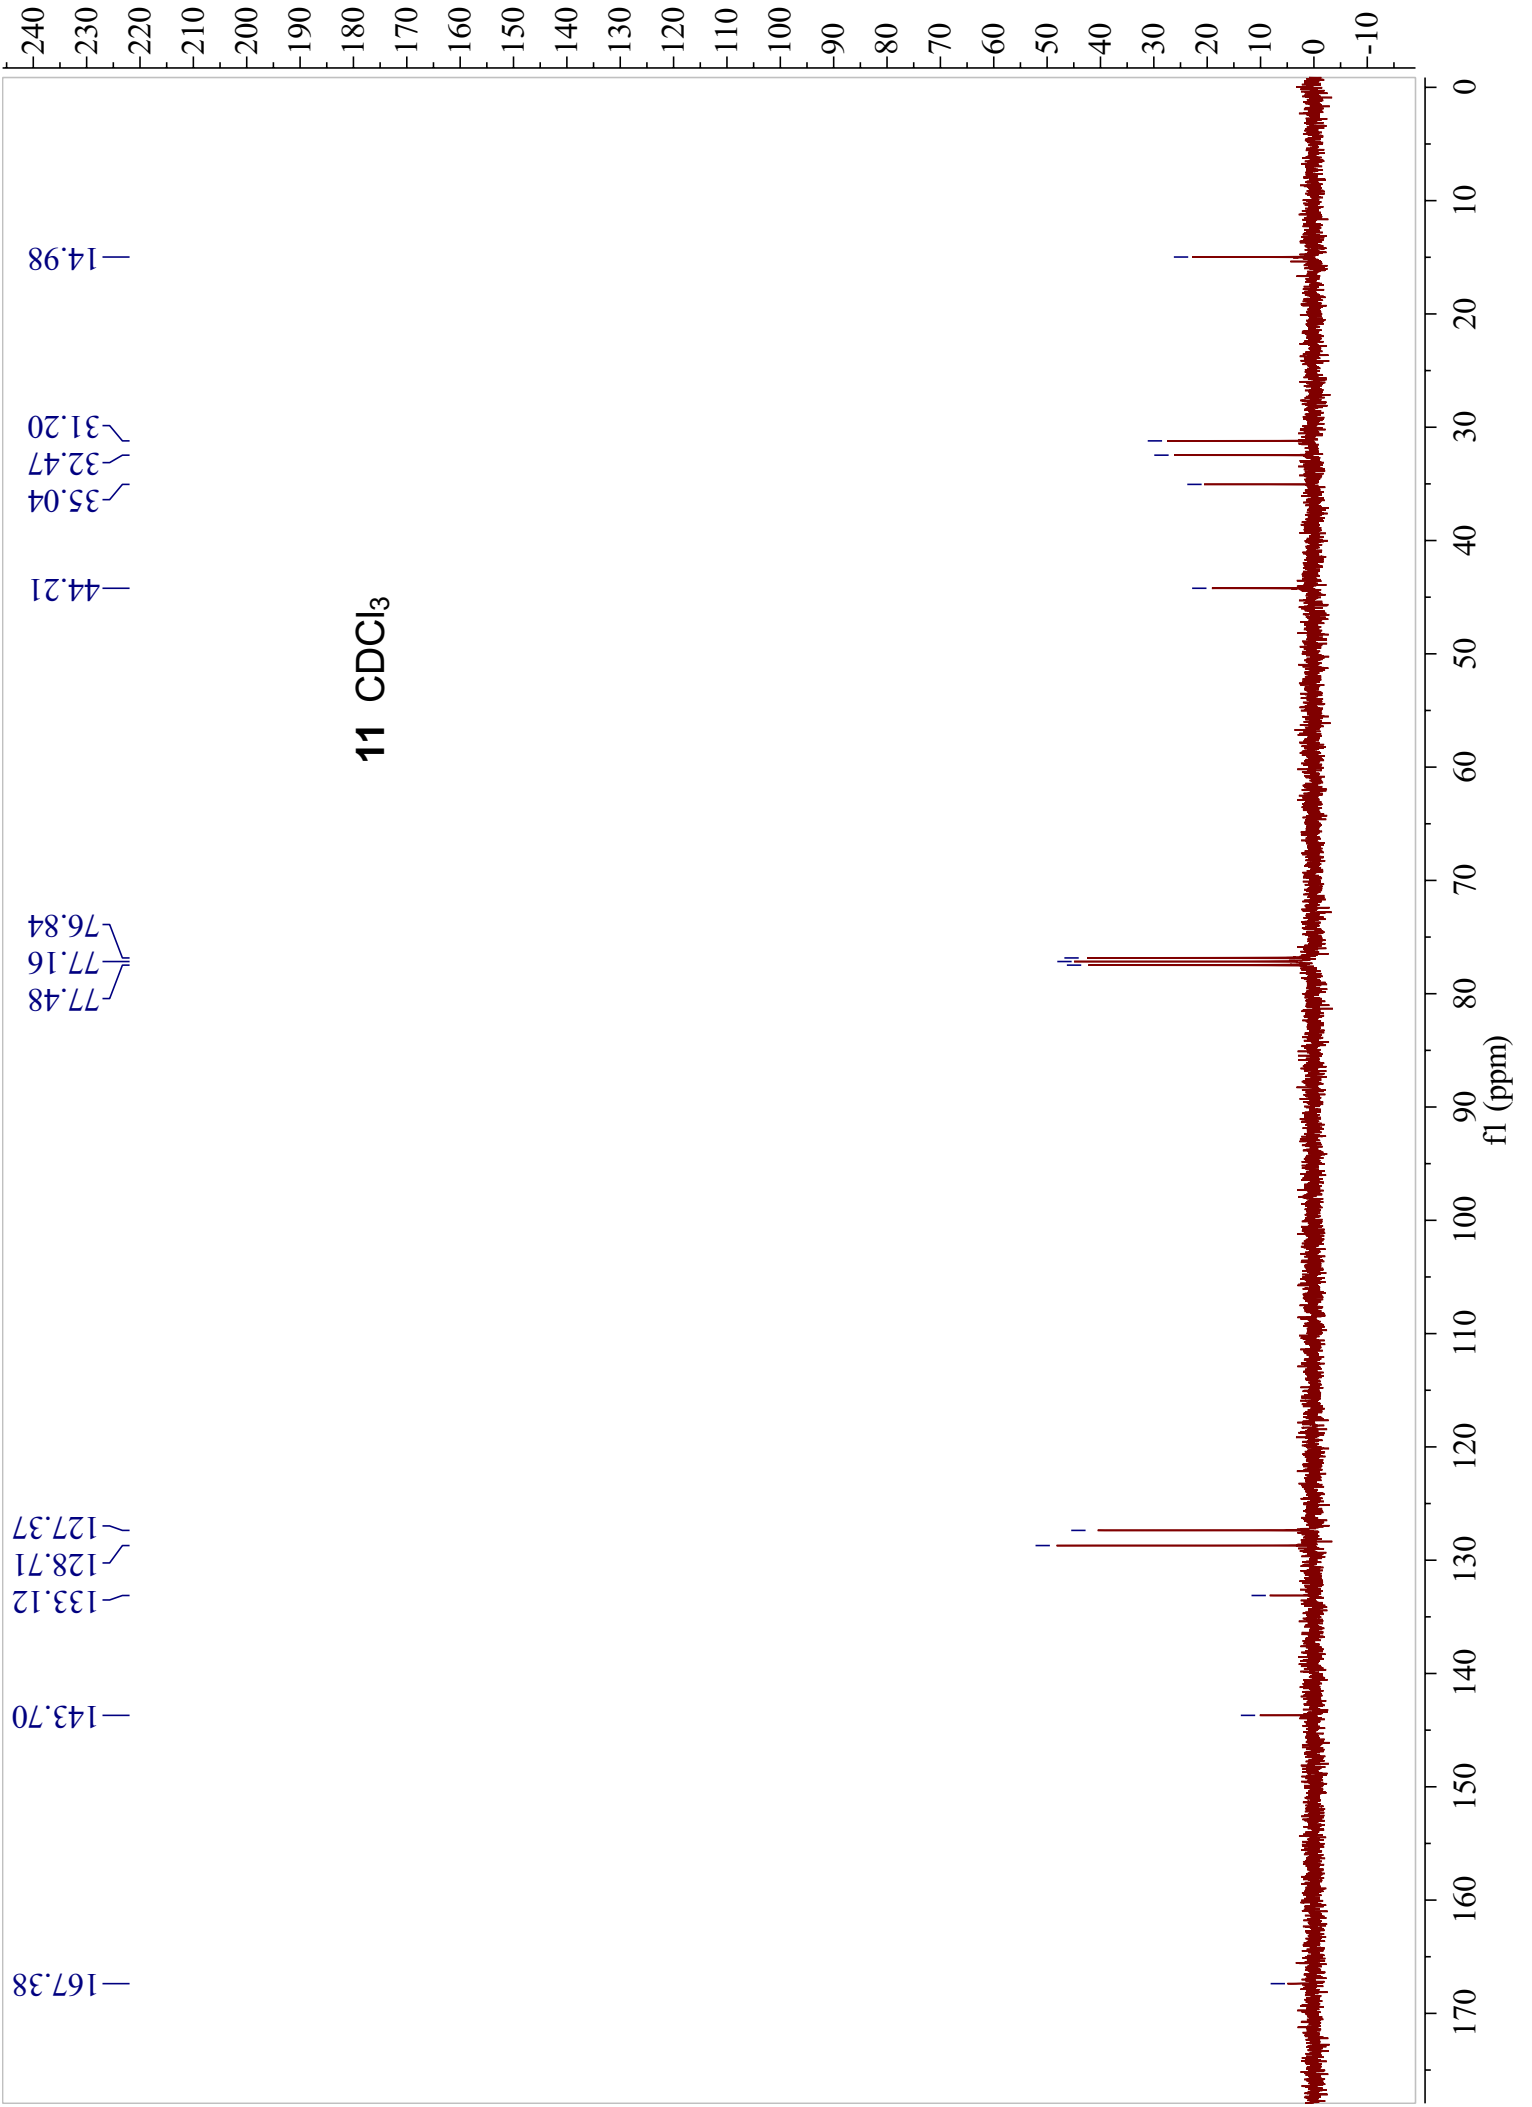

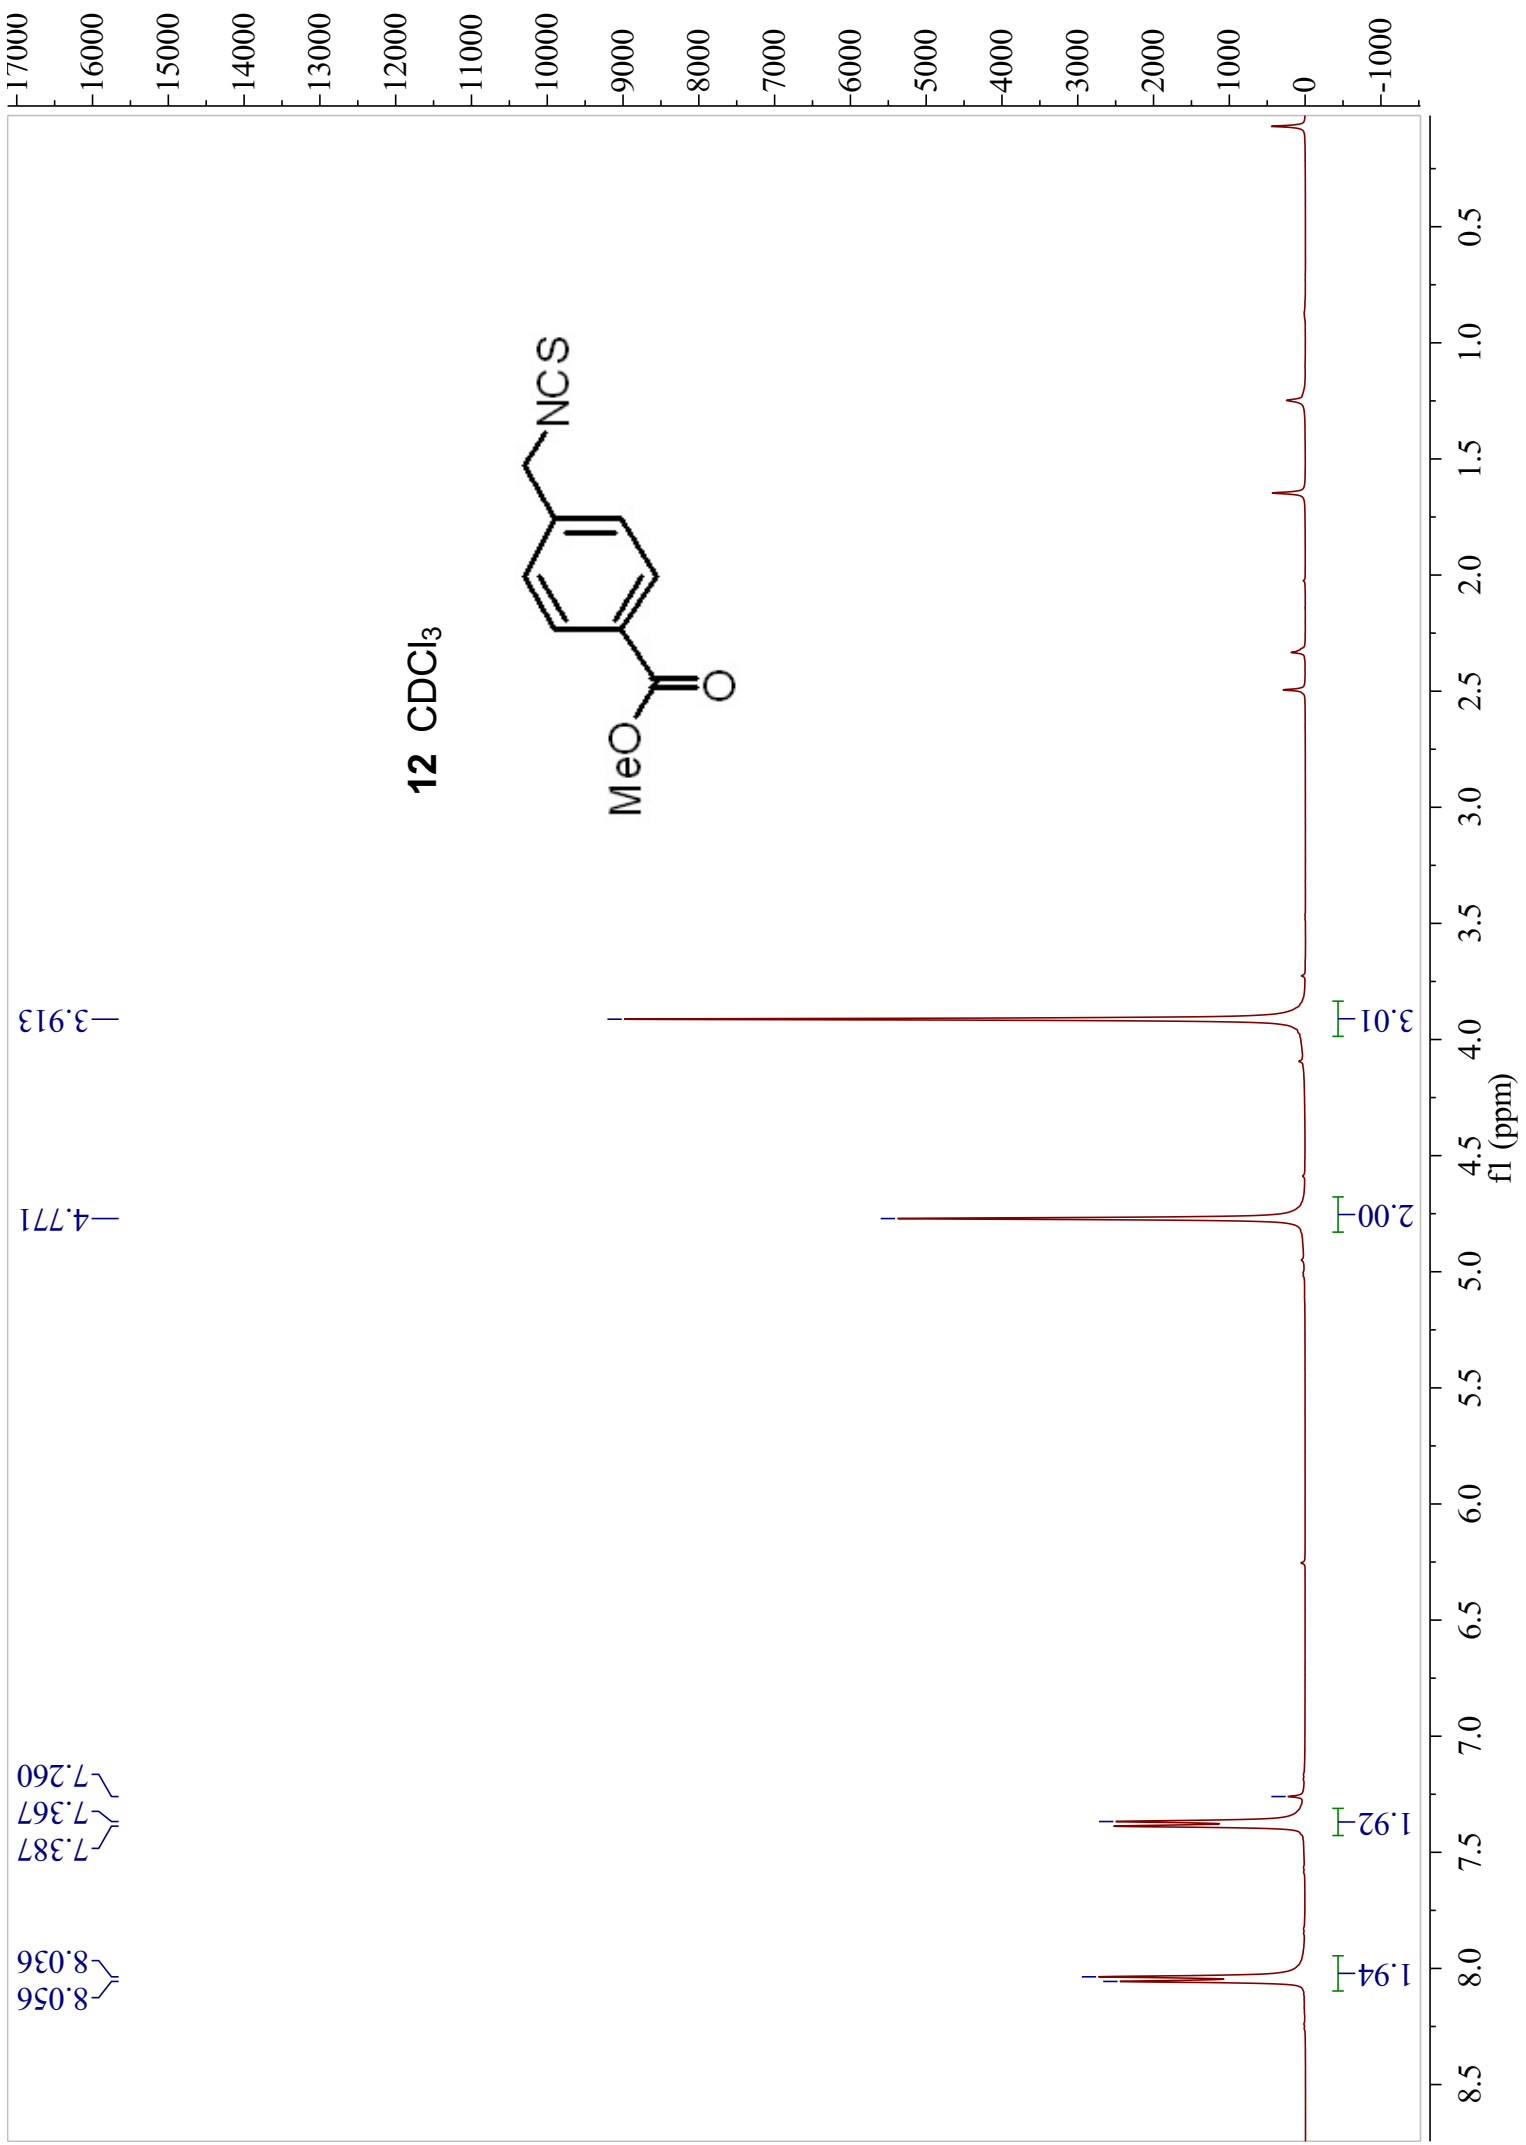



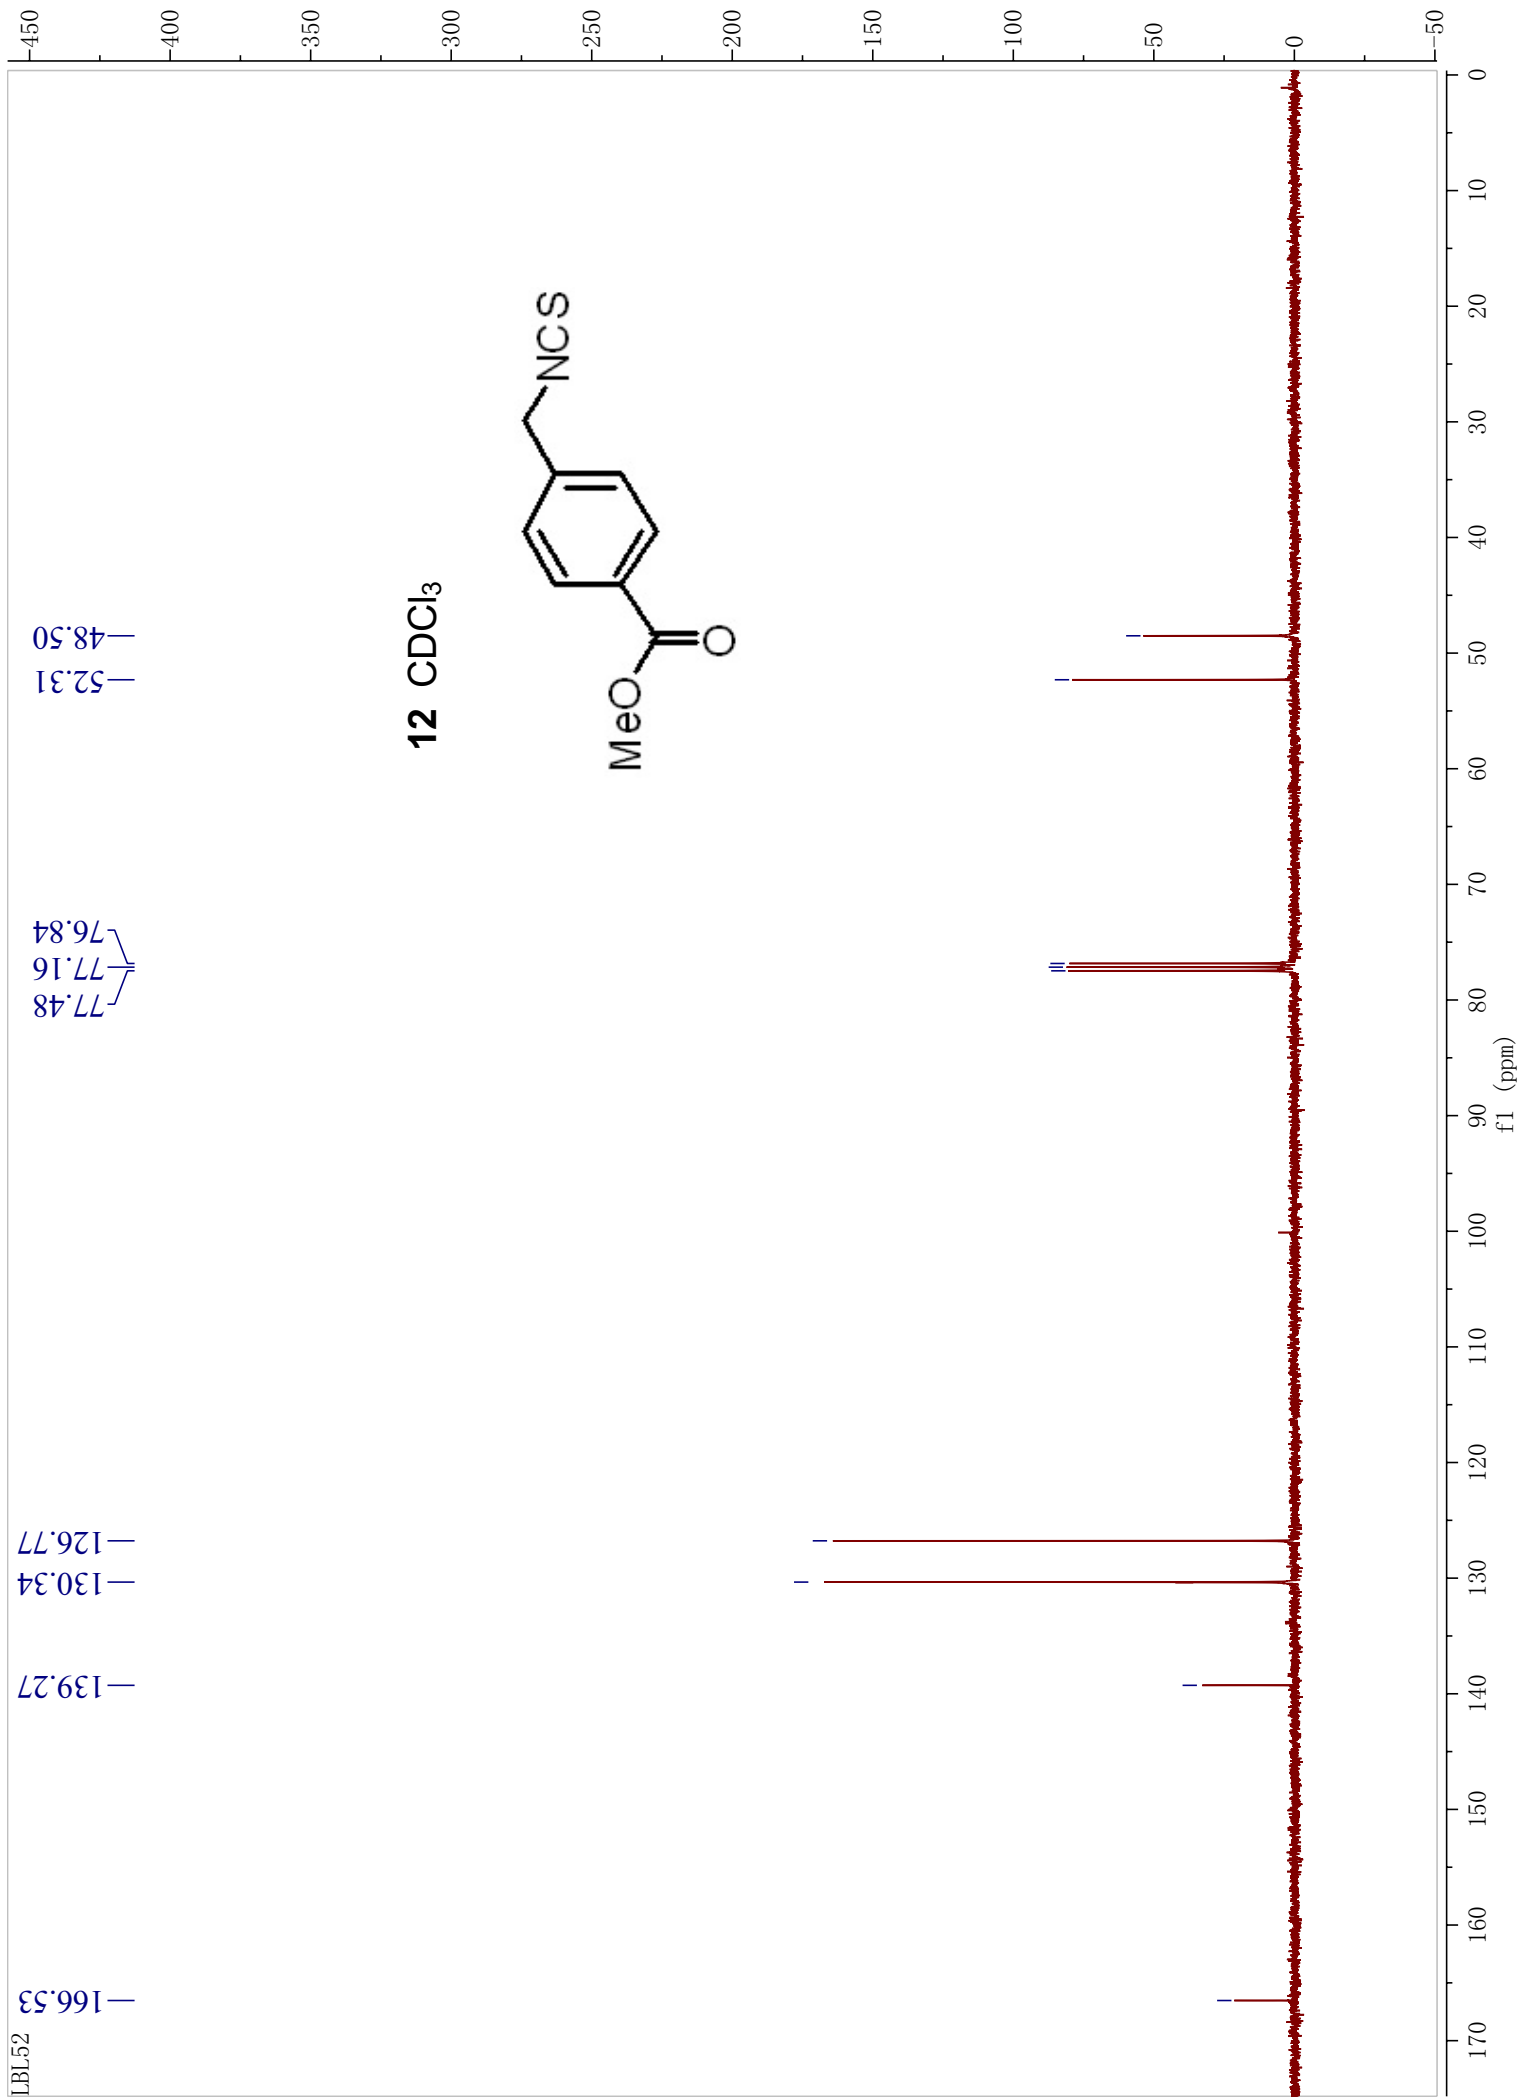

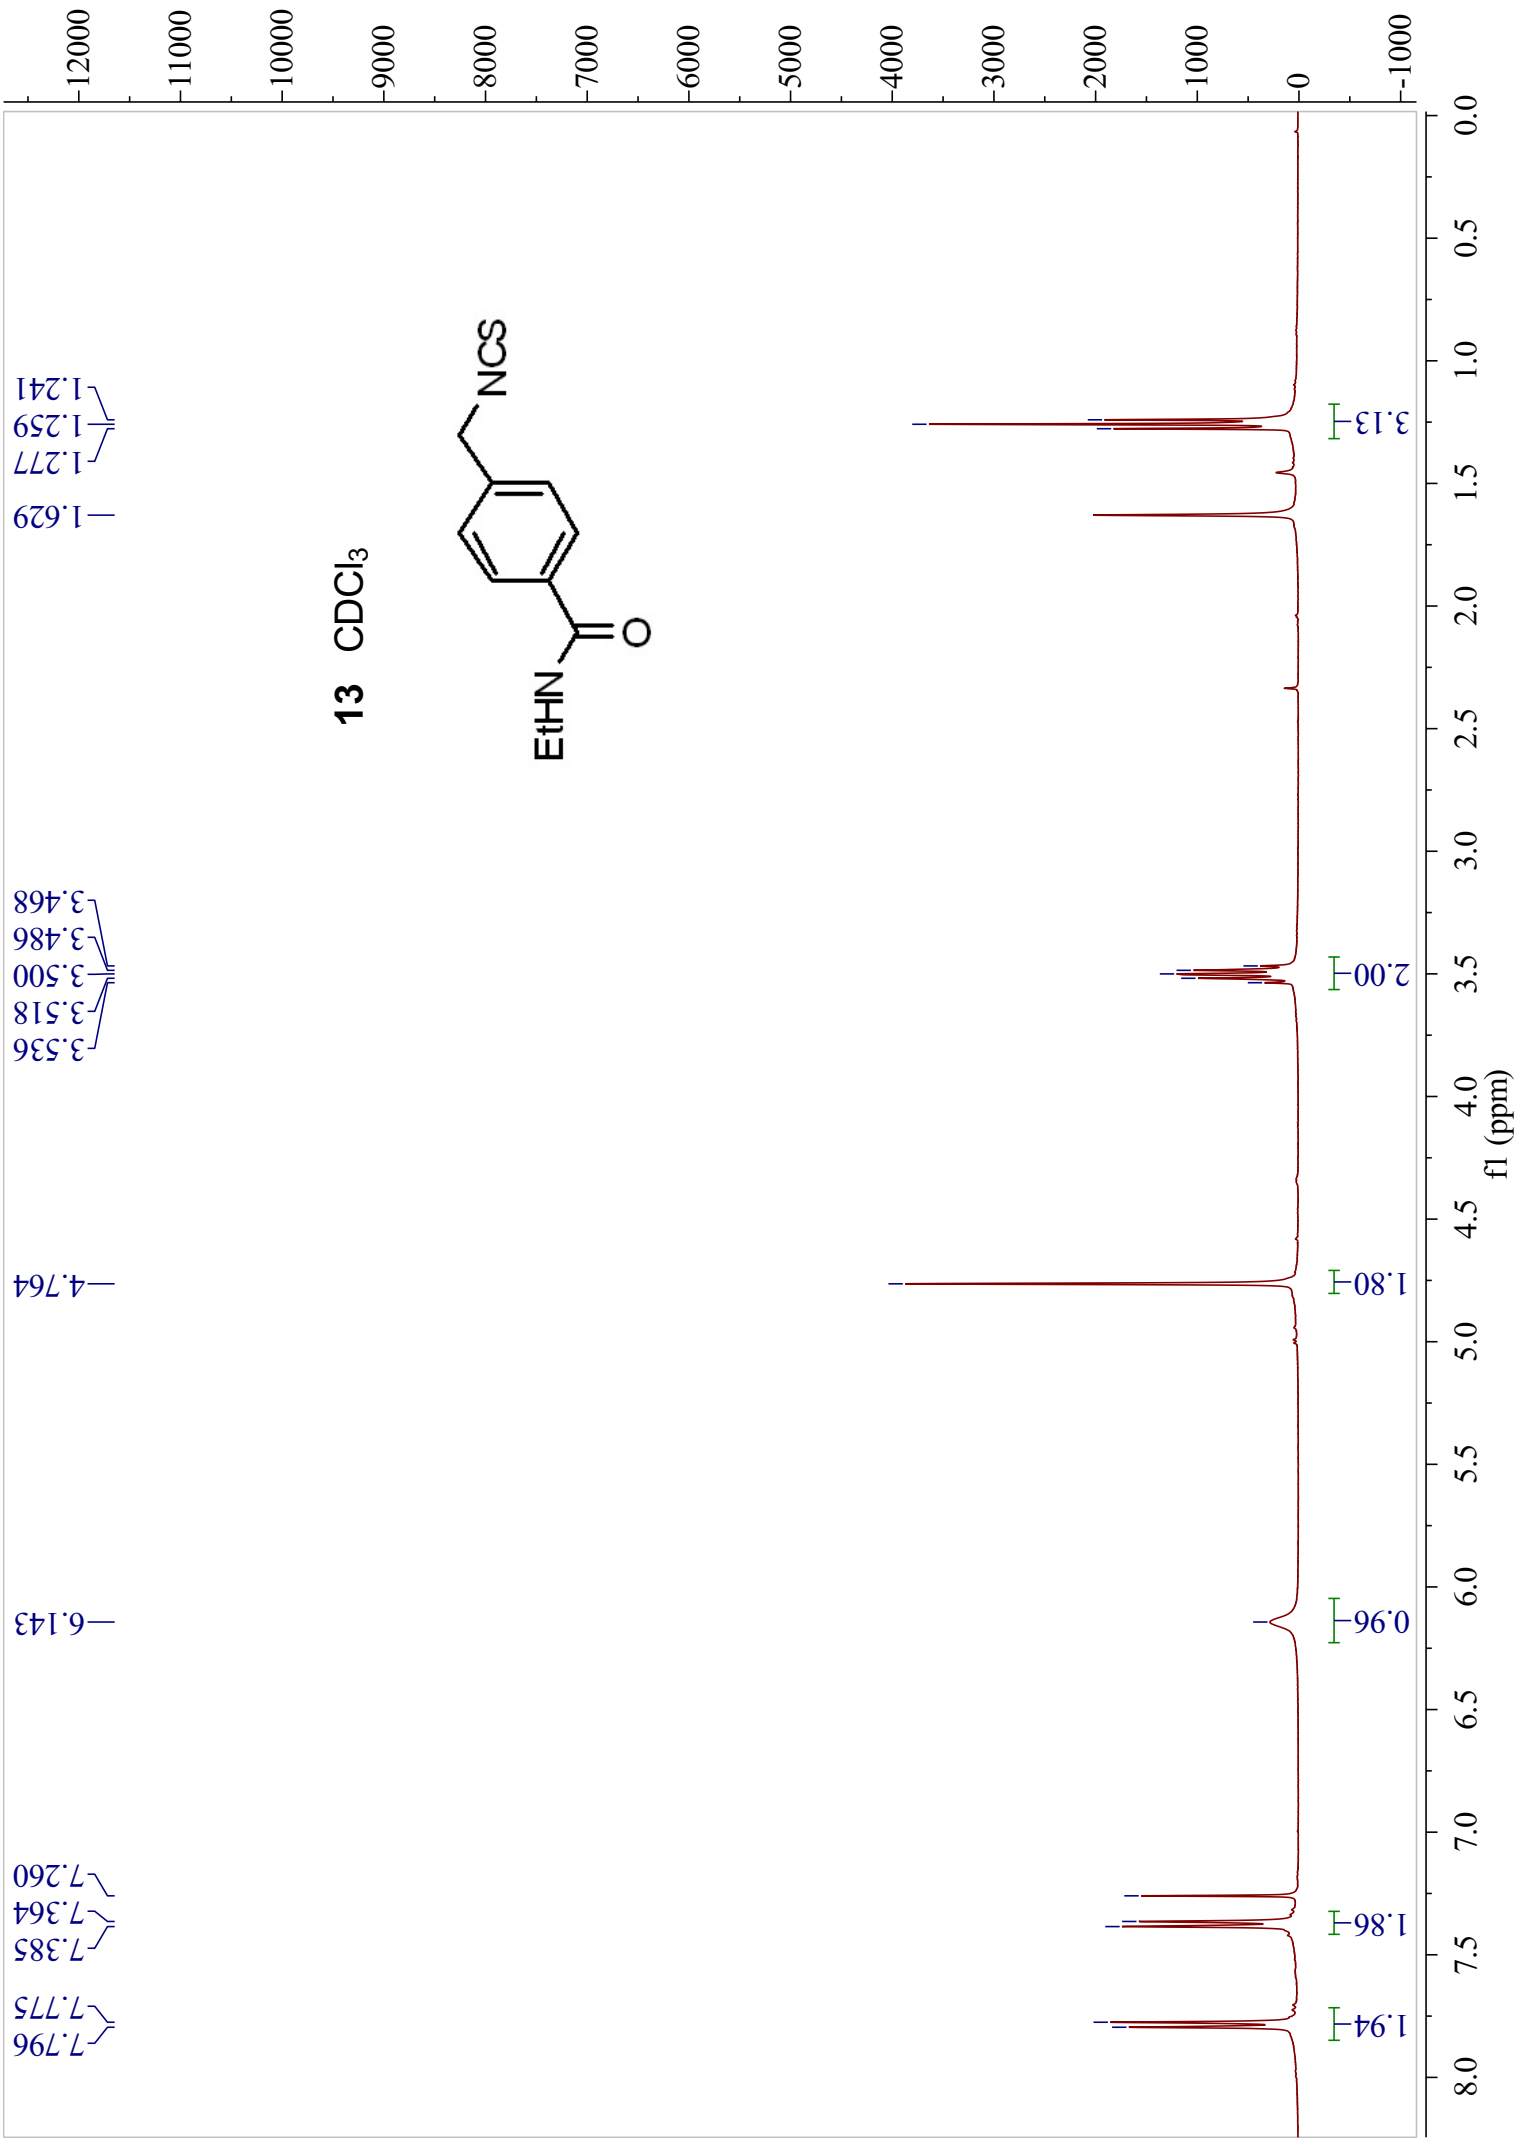

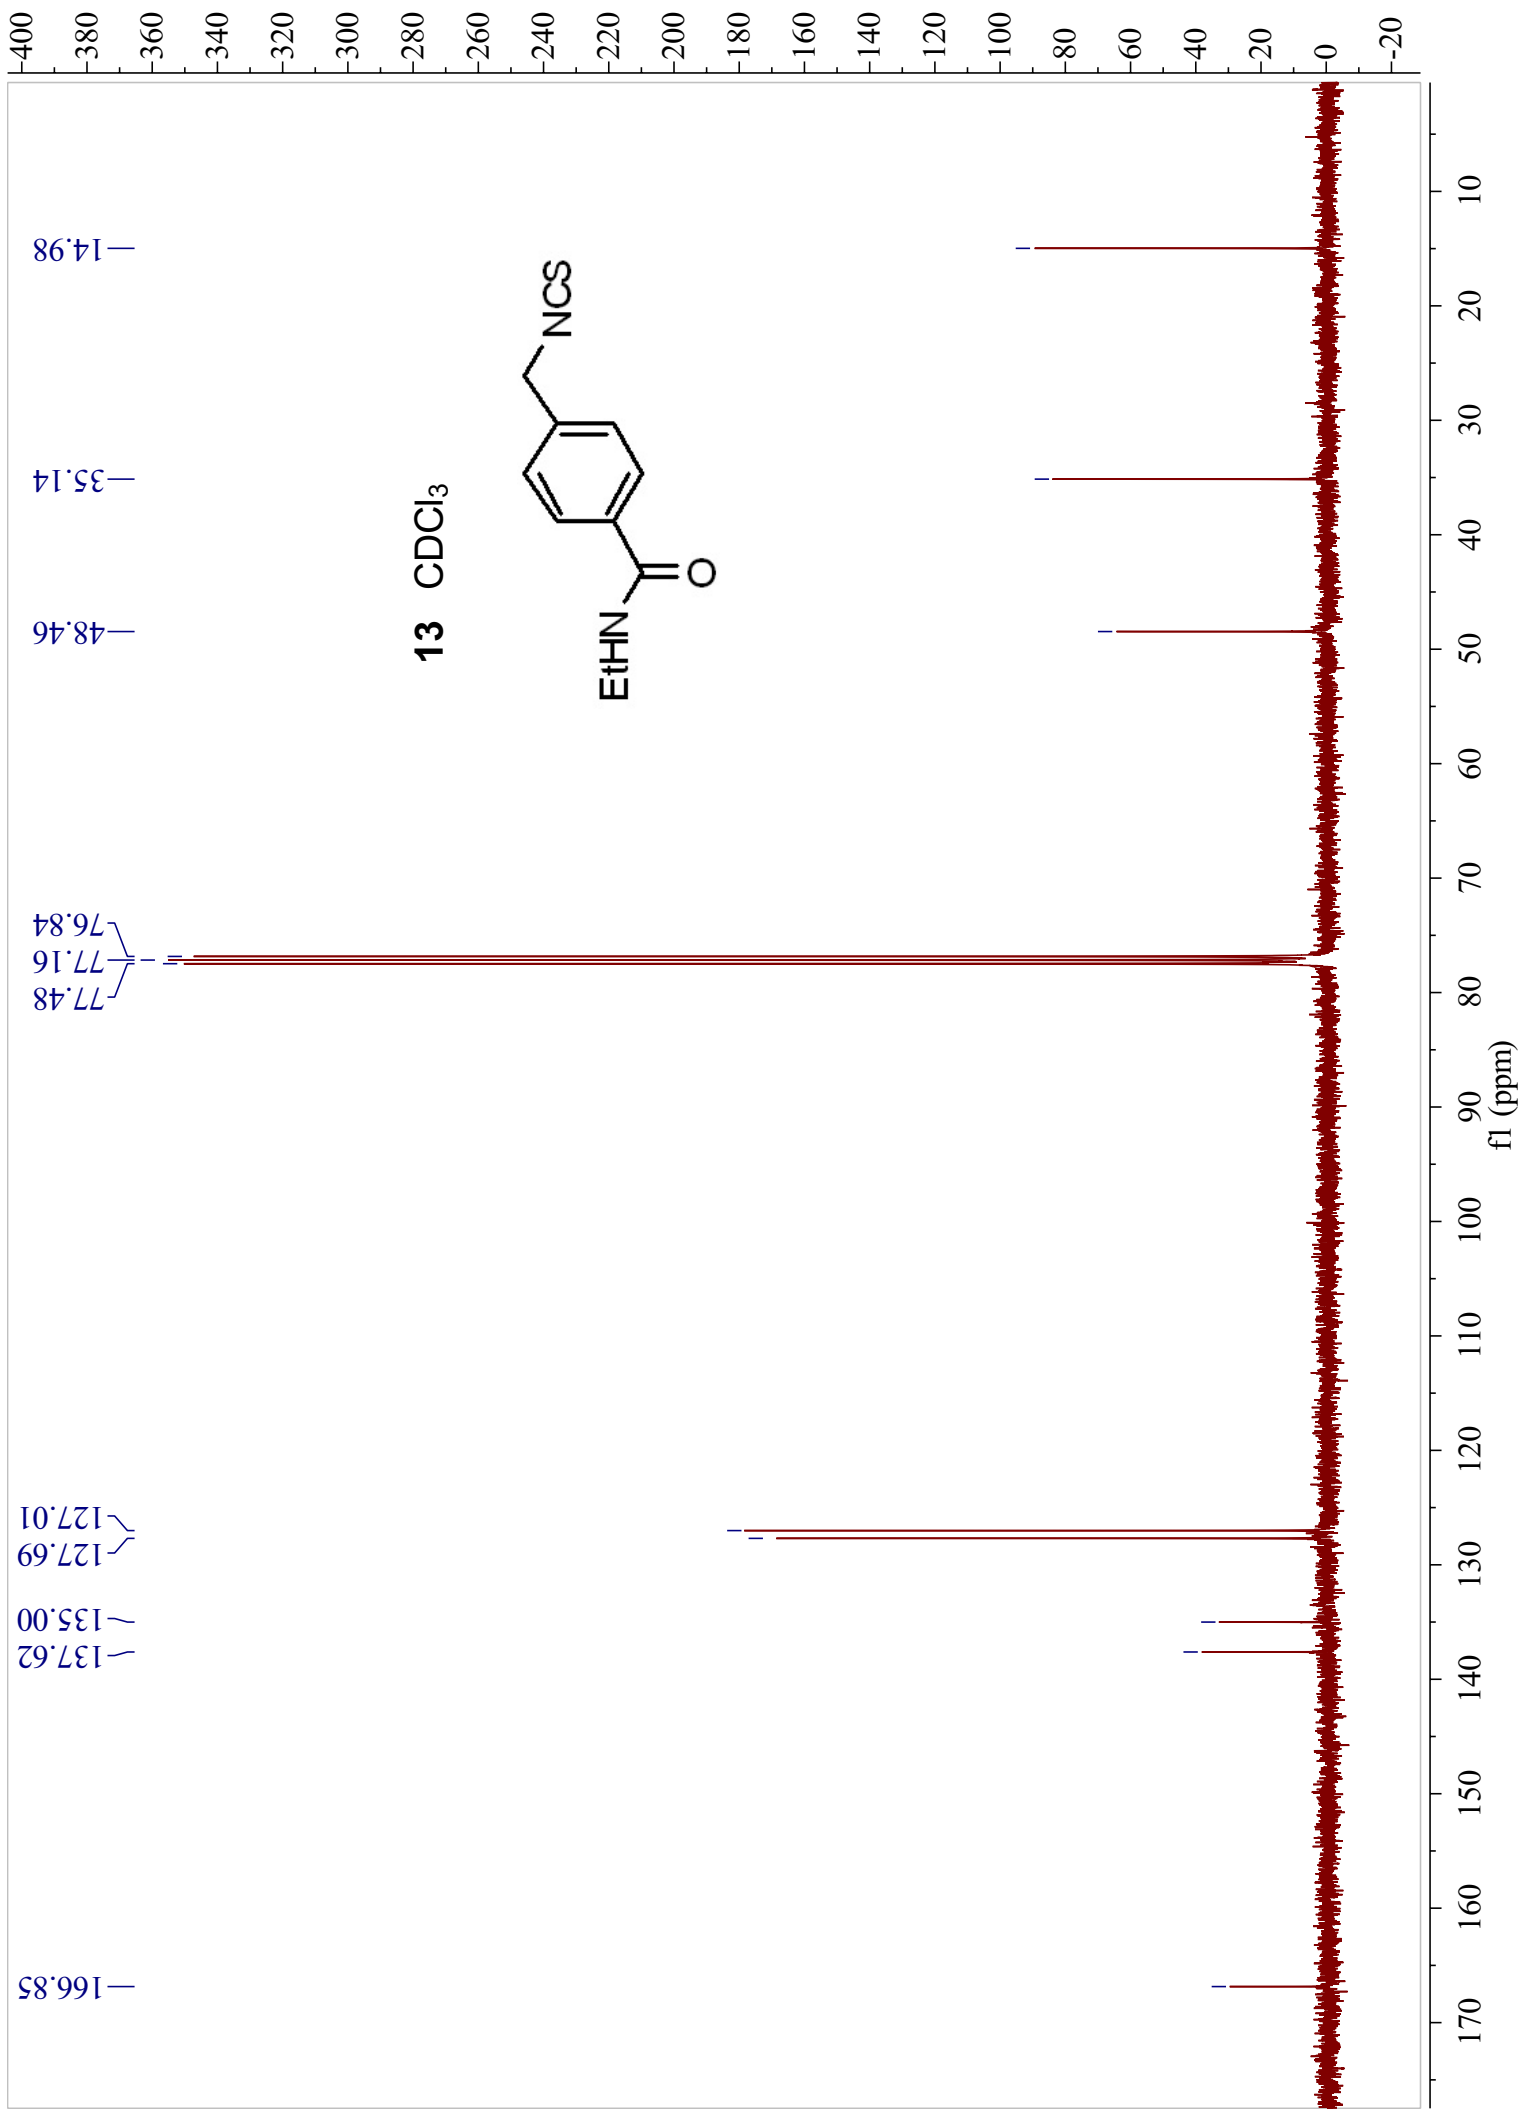

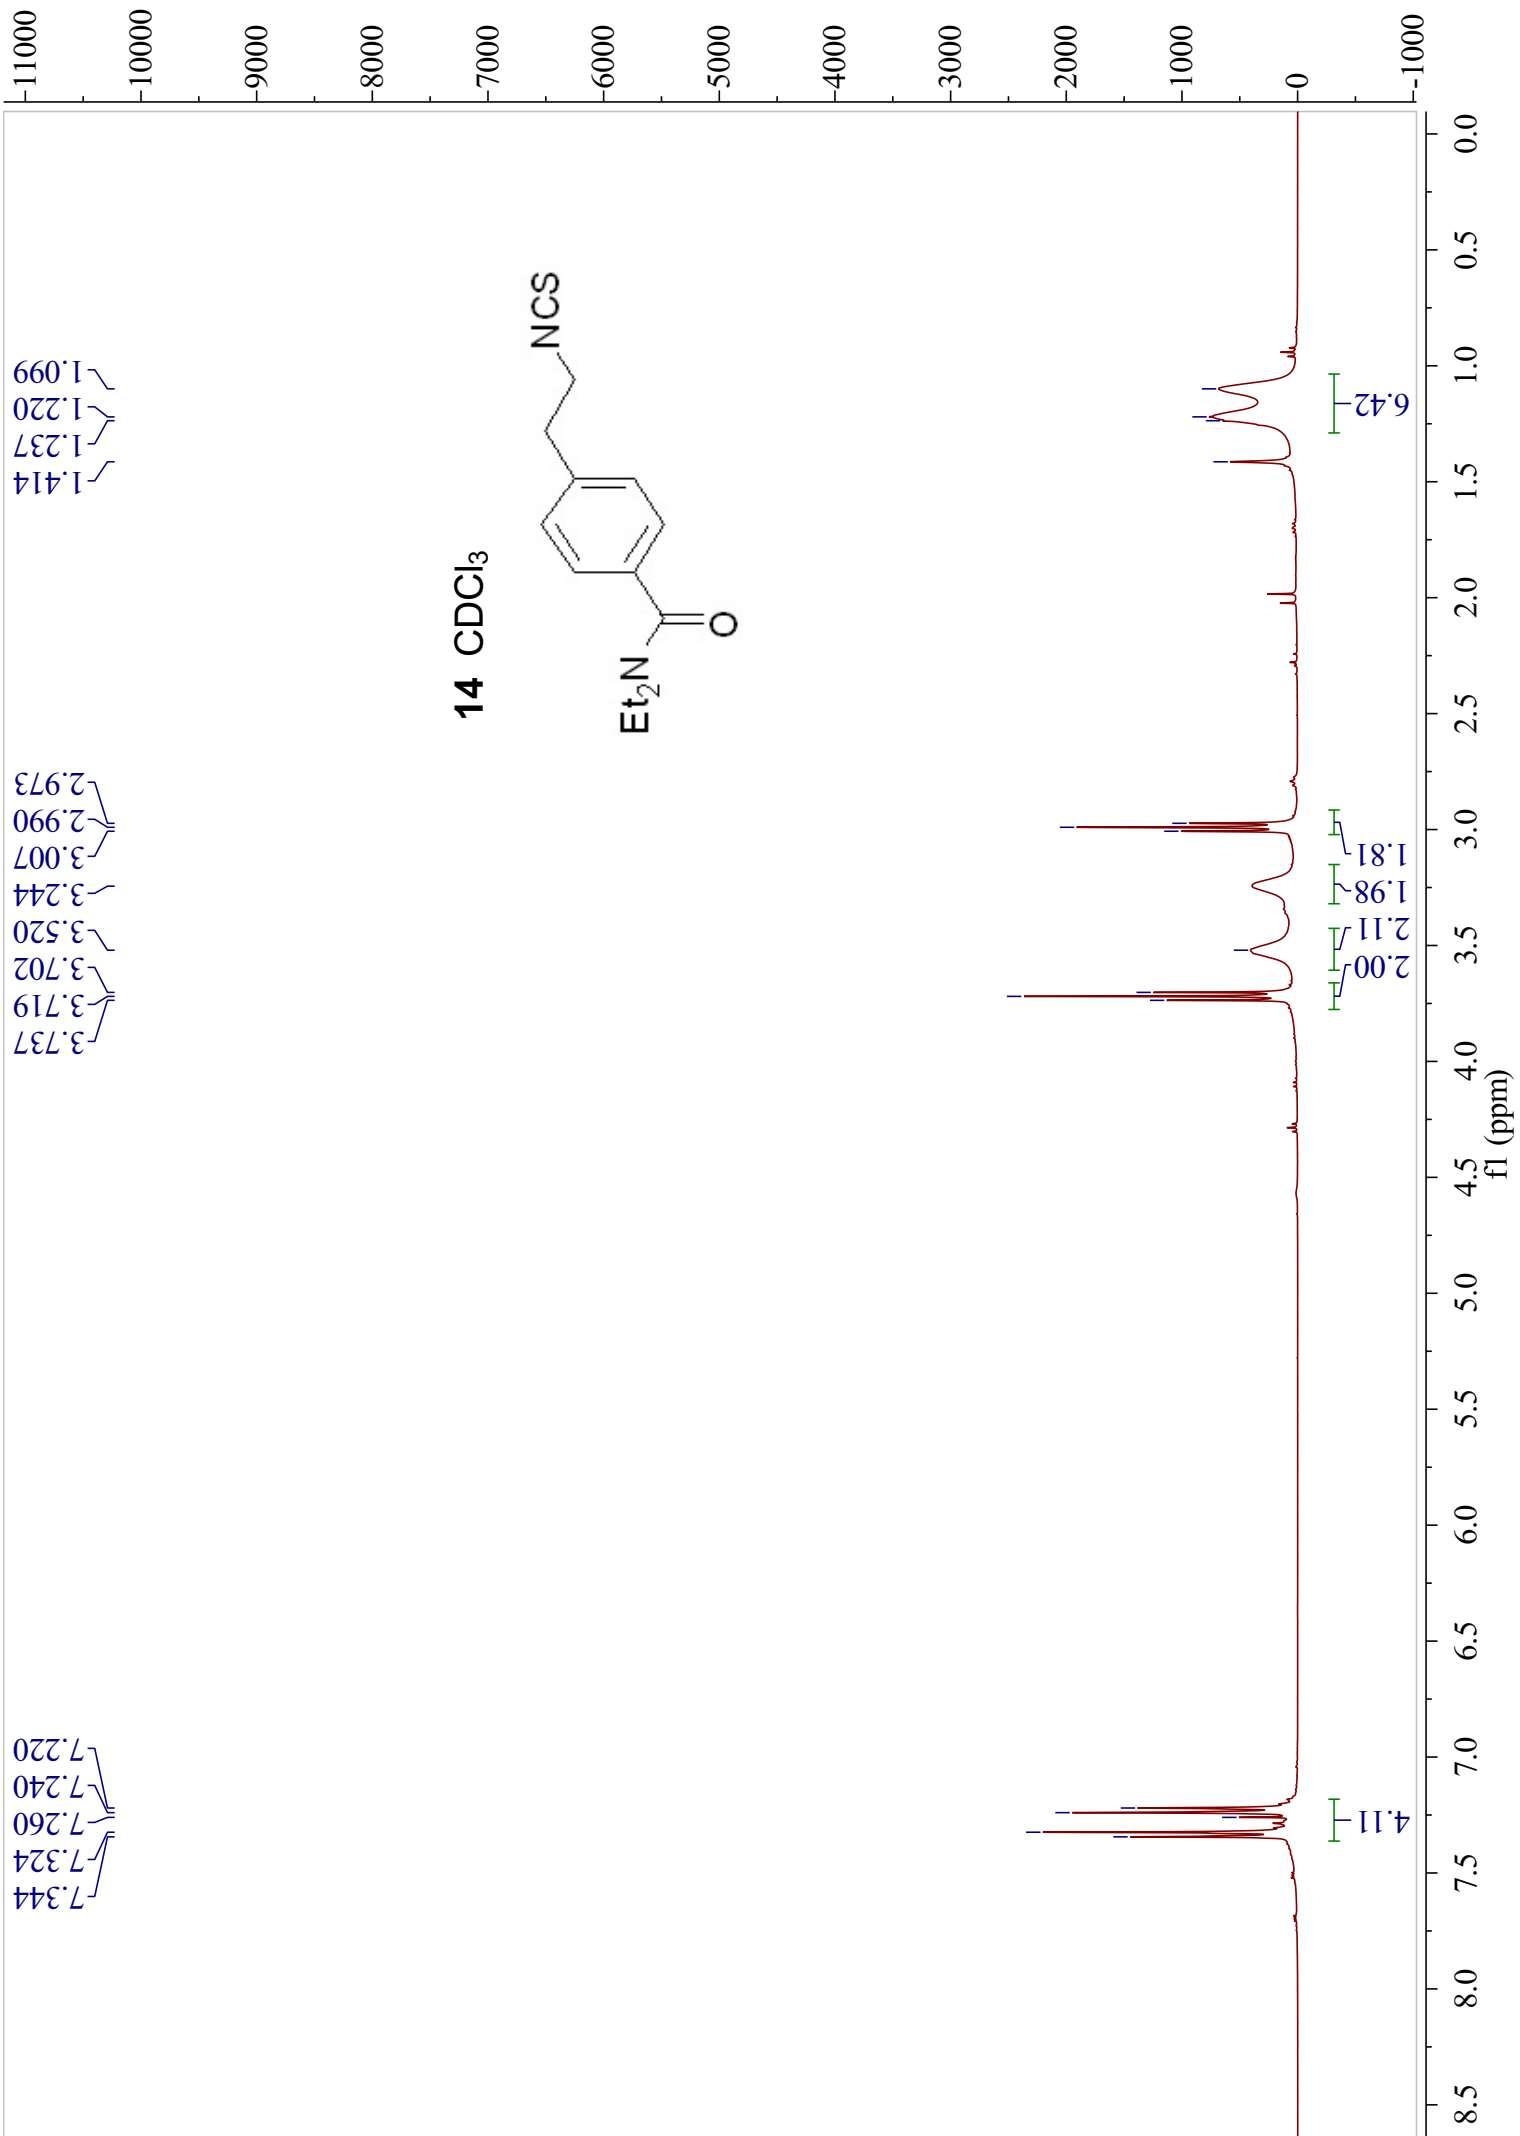

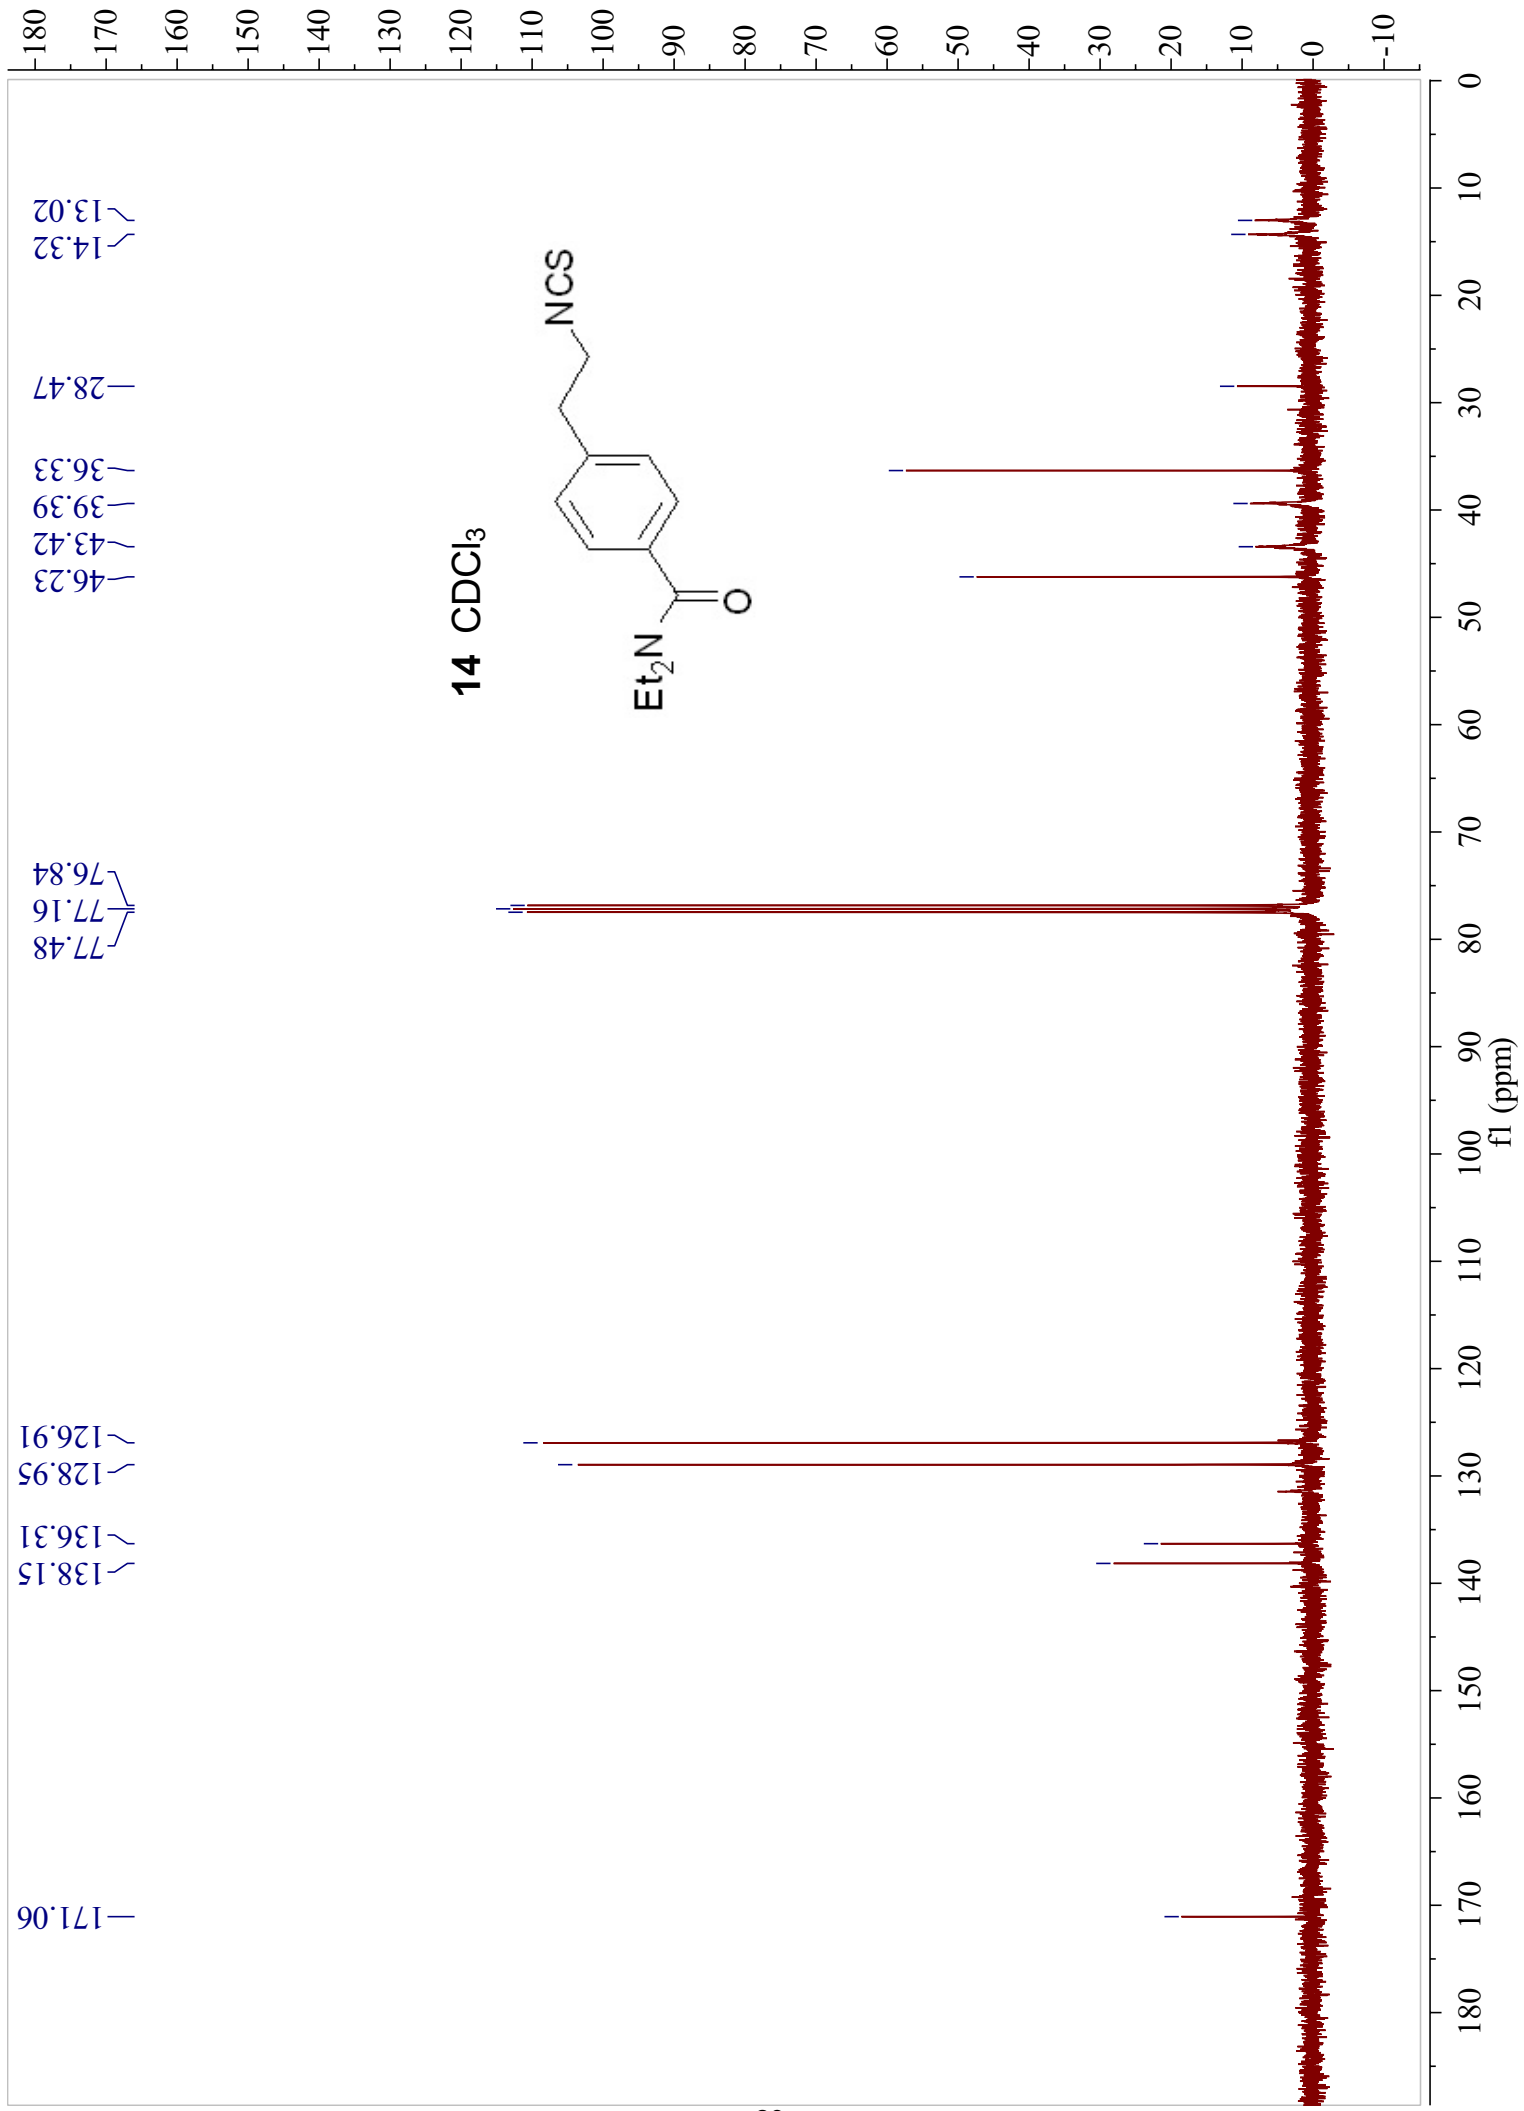

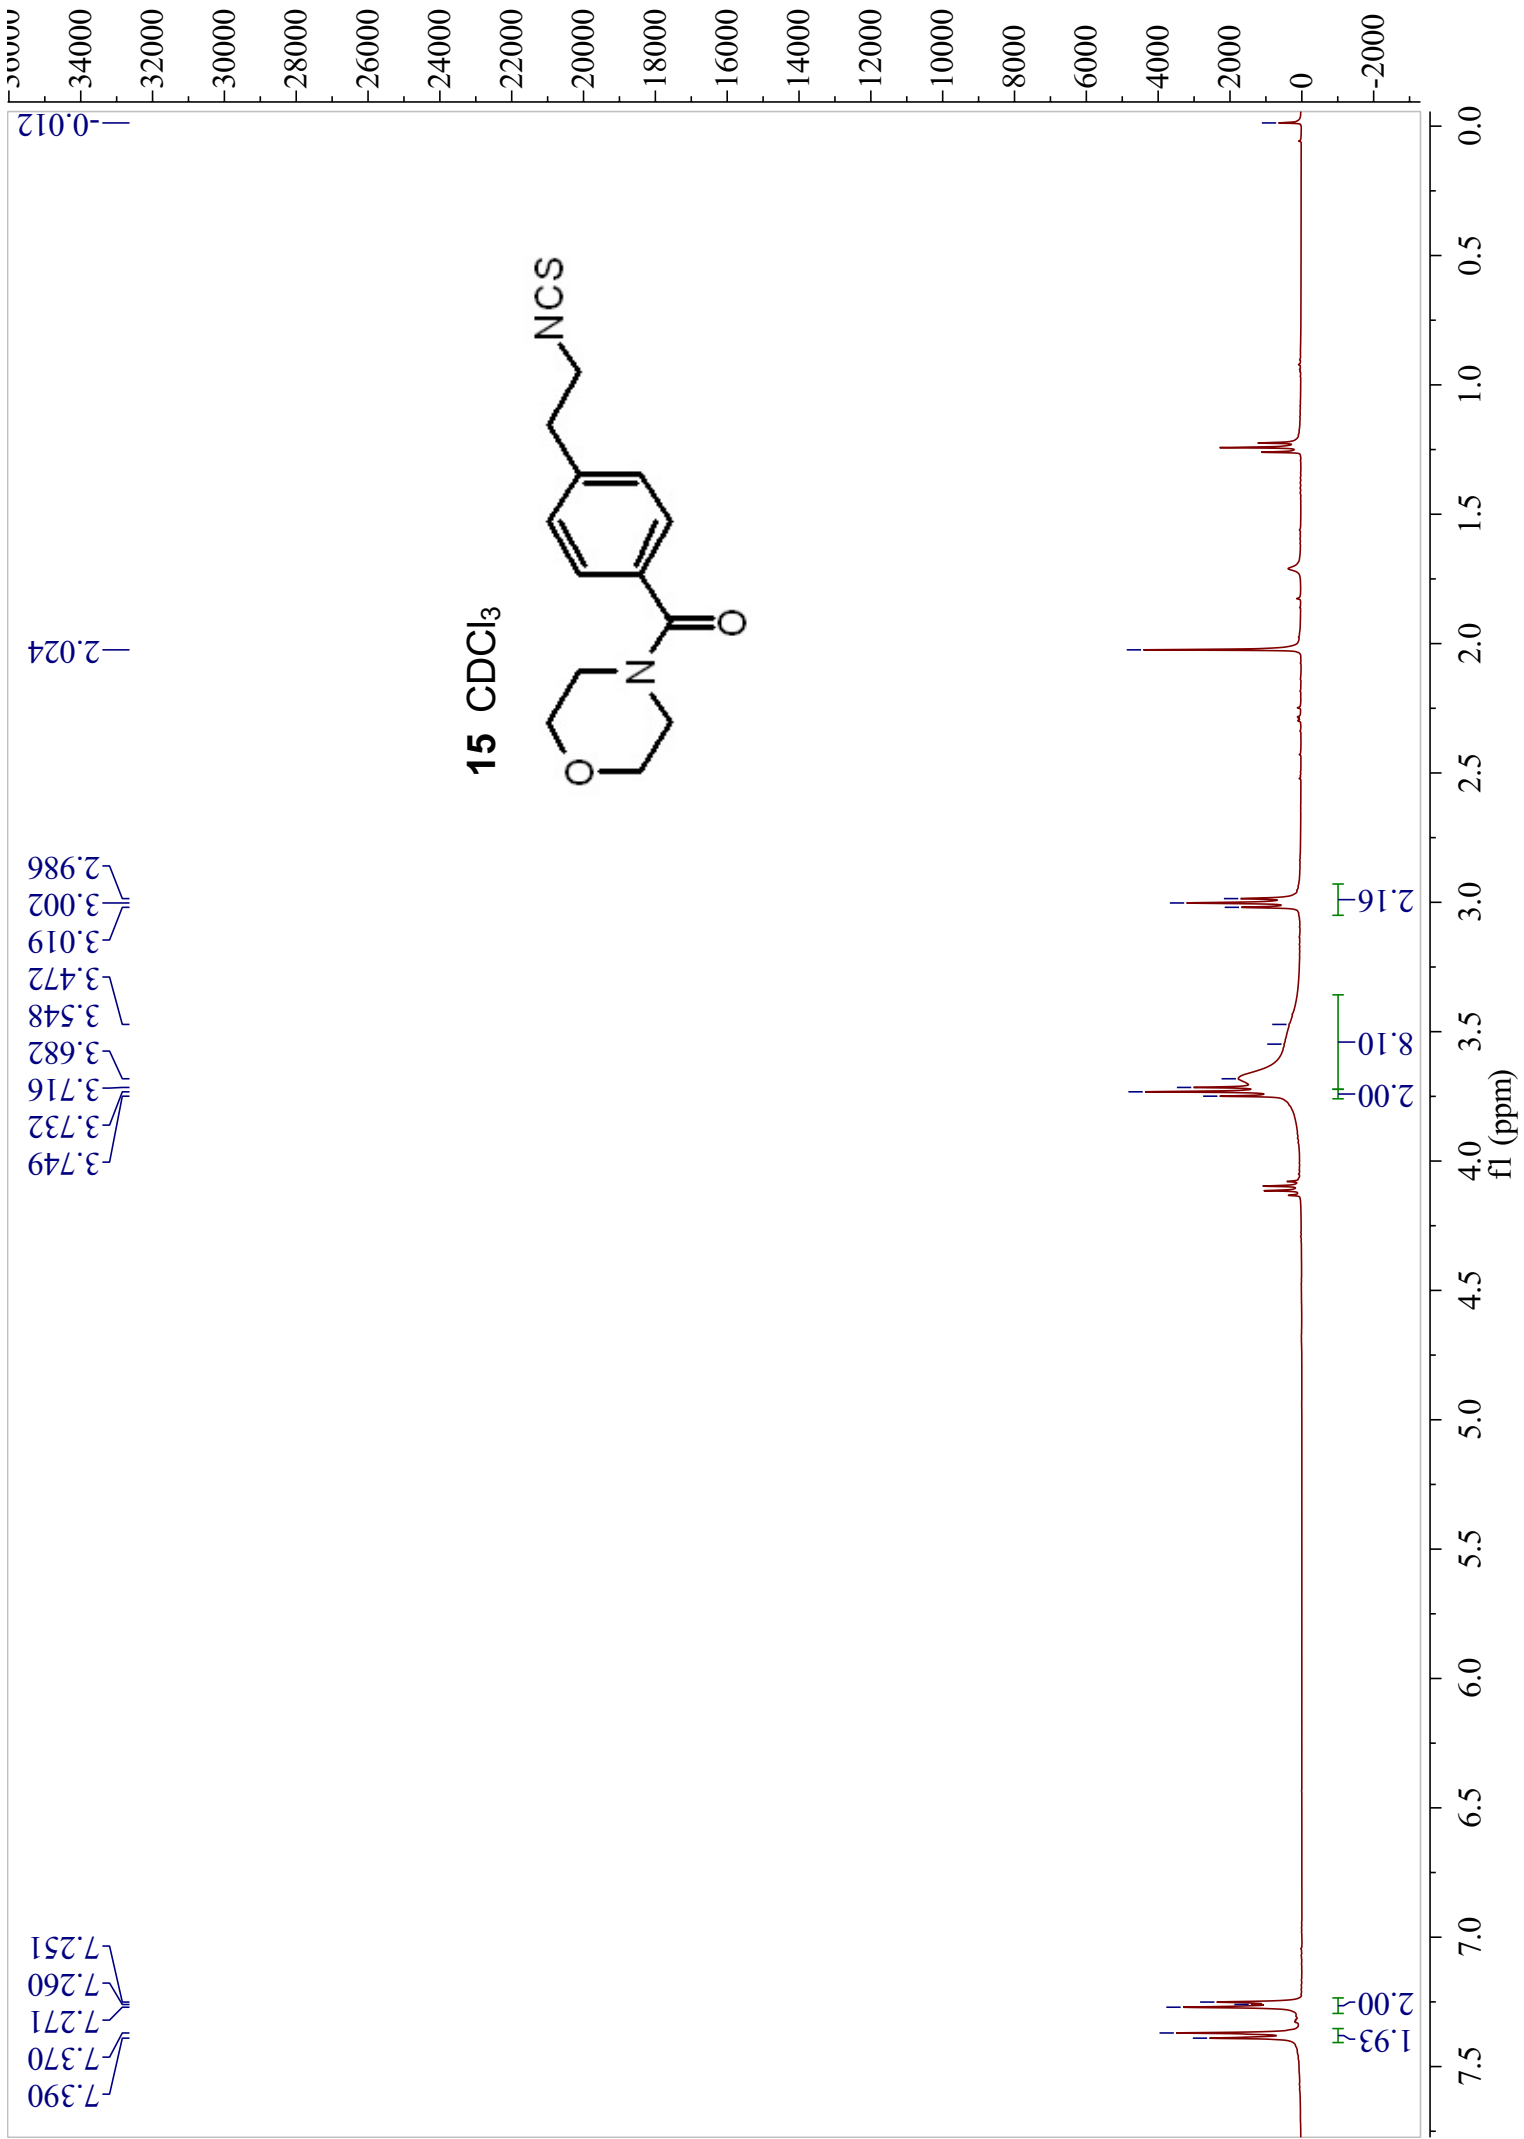

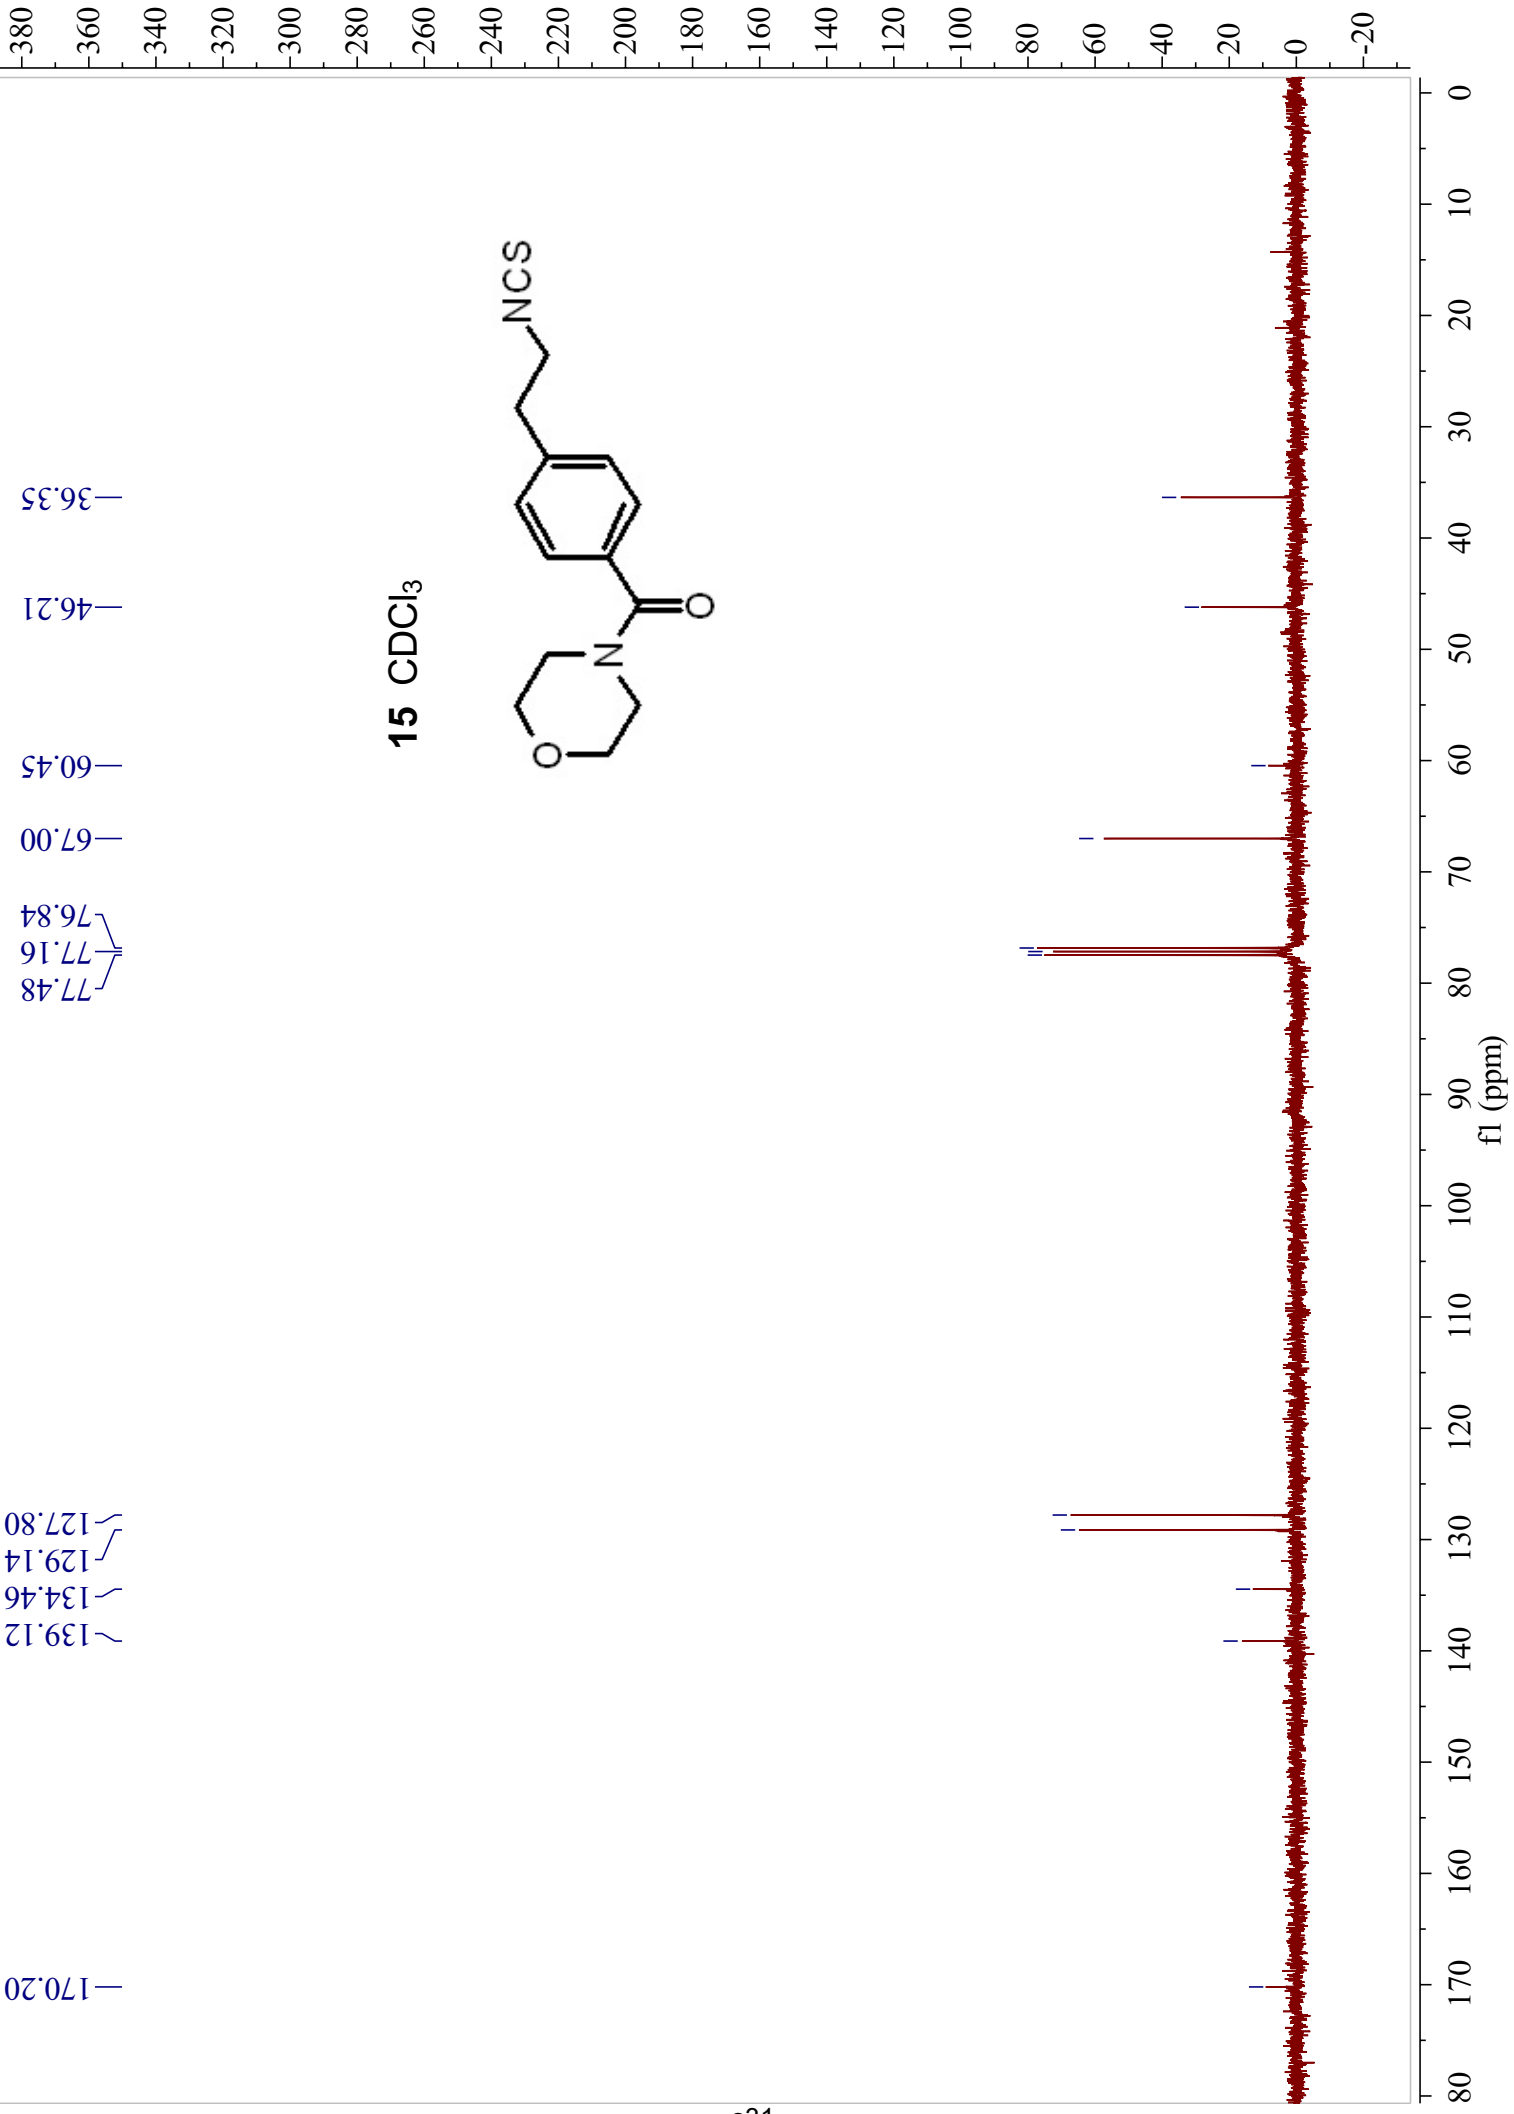

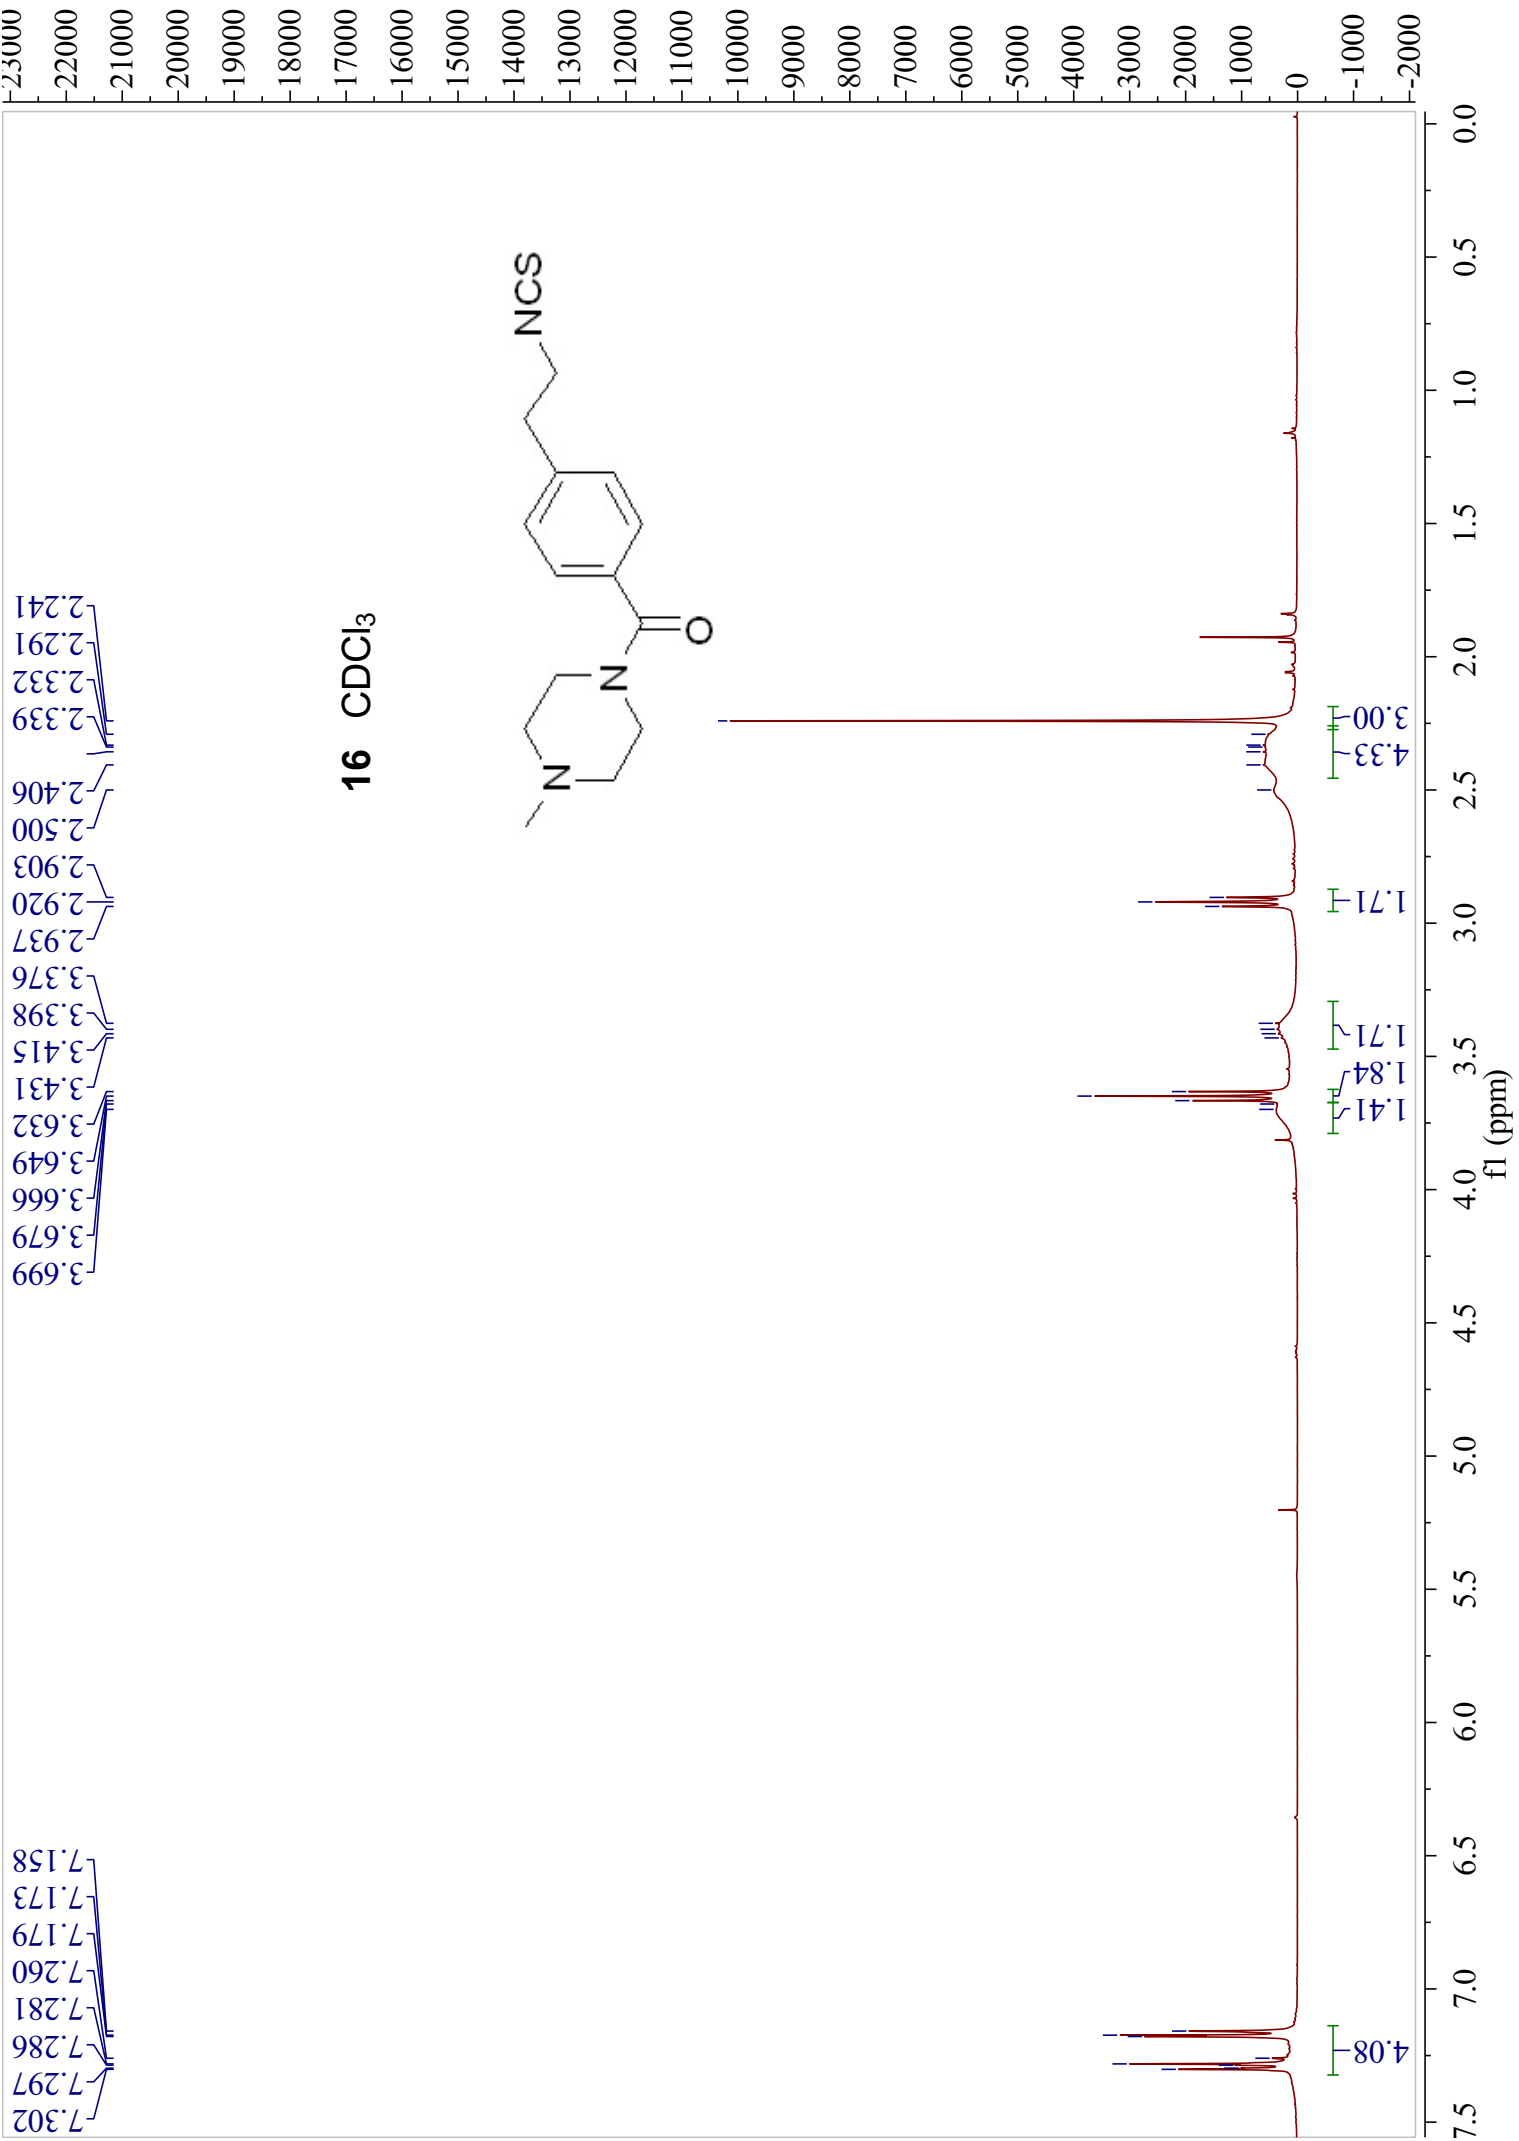



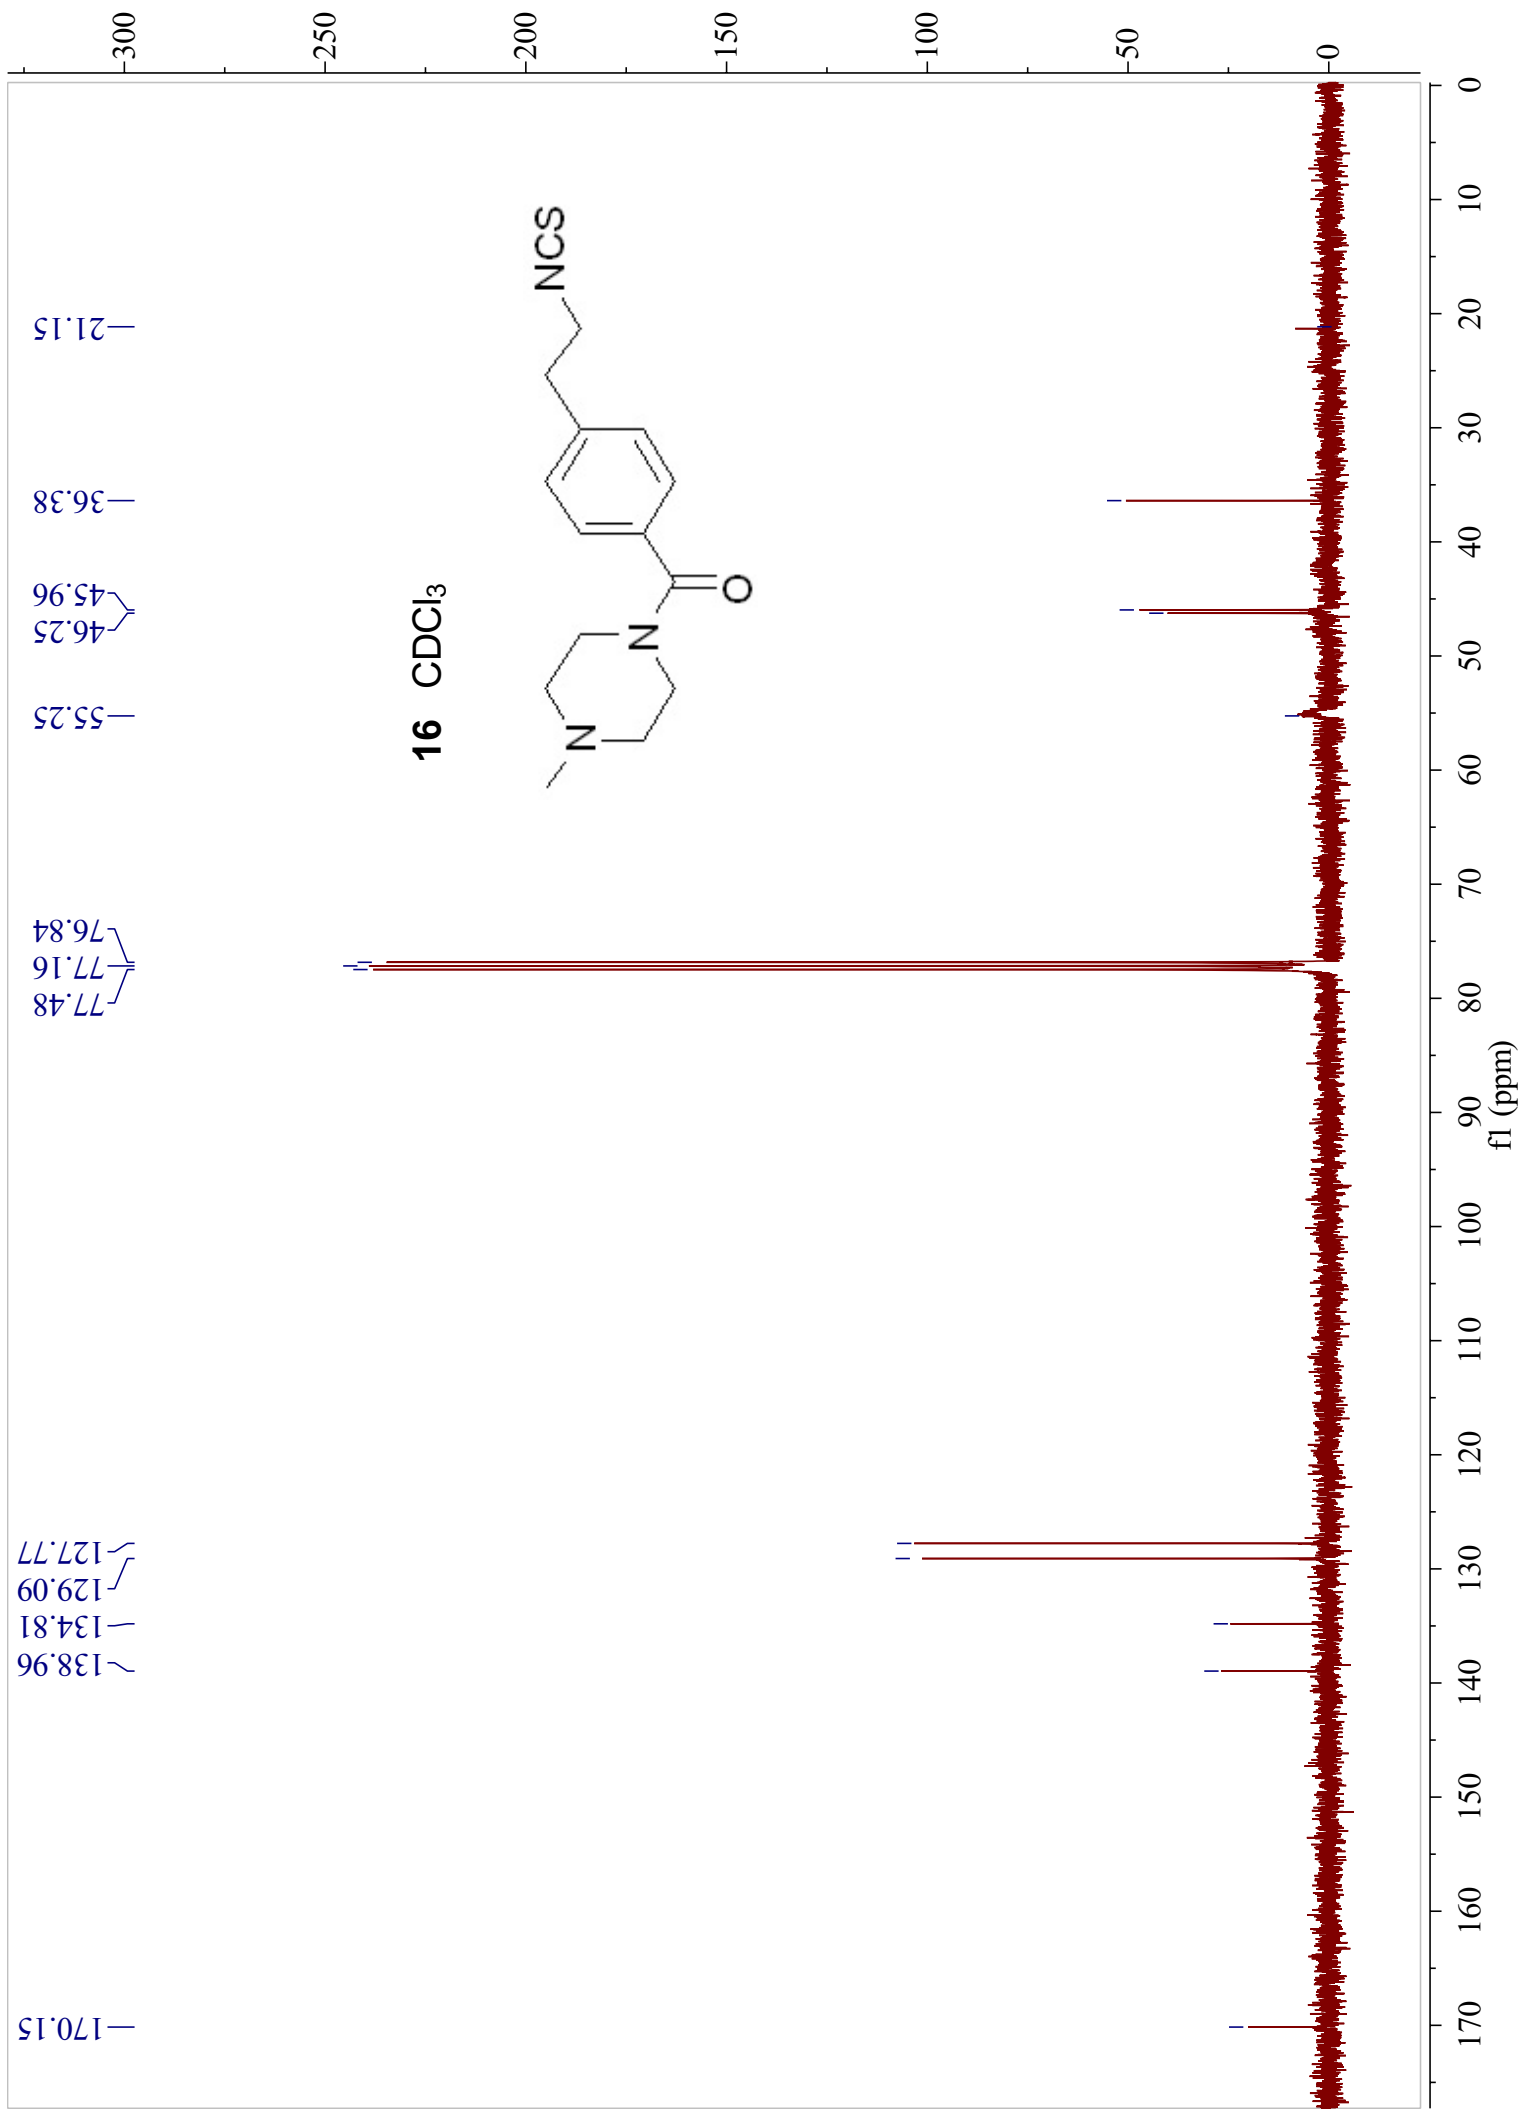

17 CDCl<sub>3</sub>

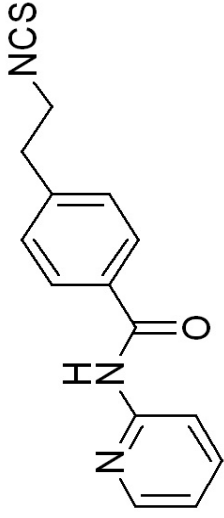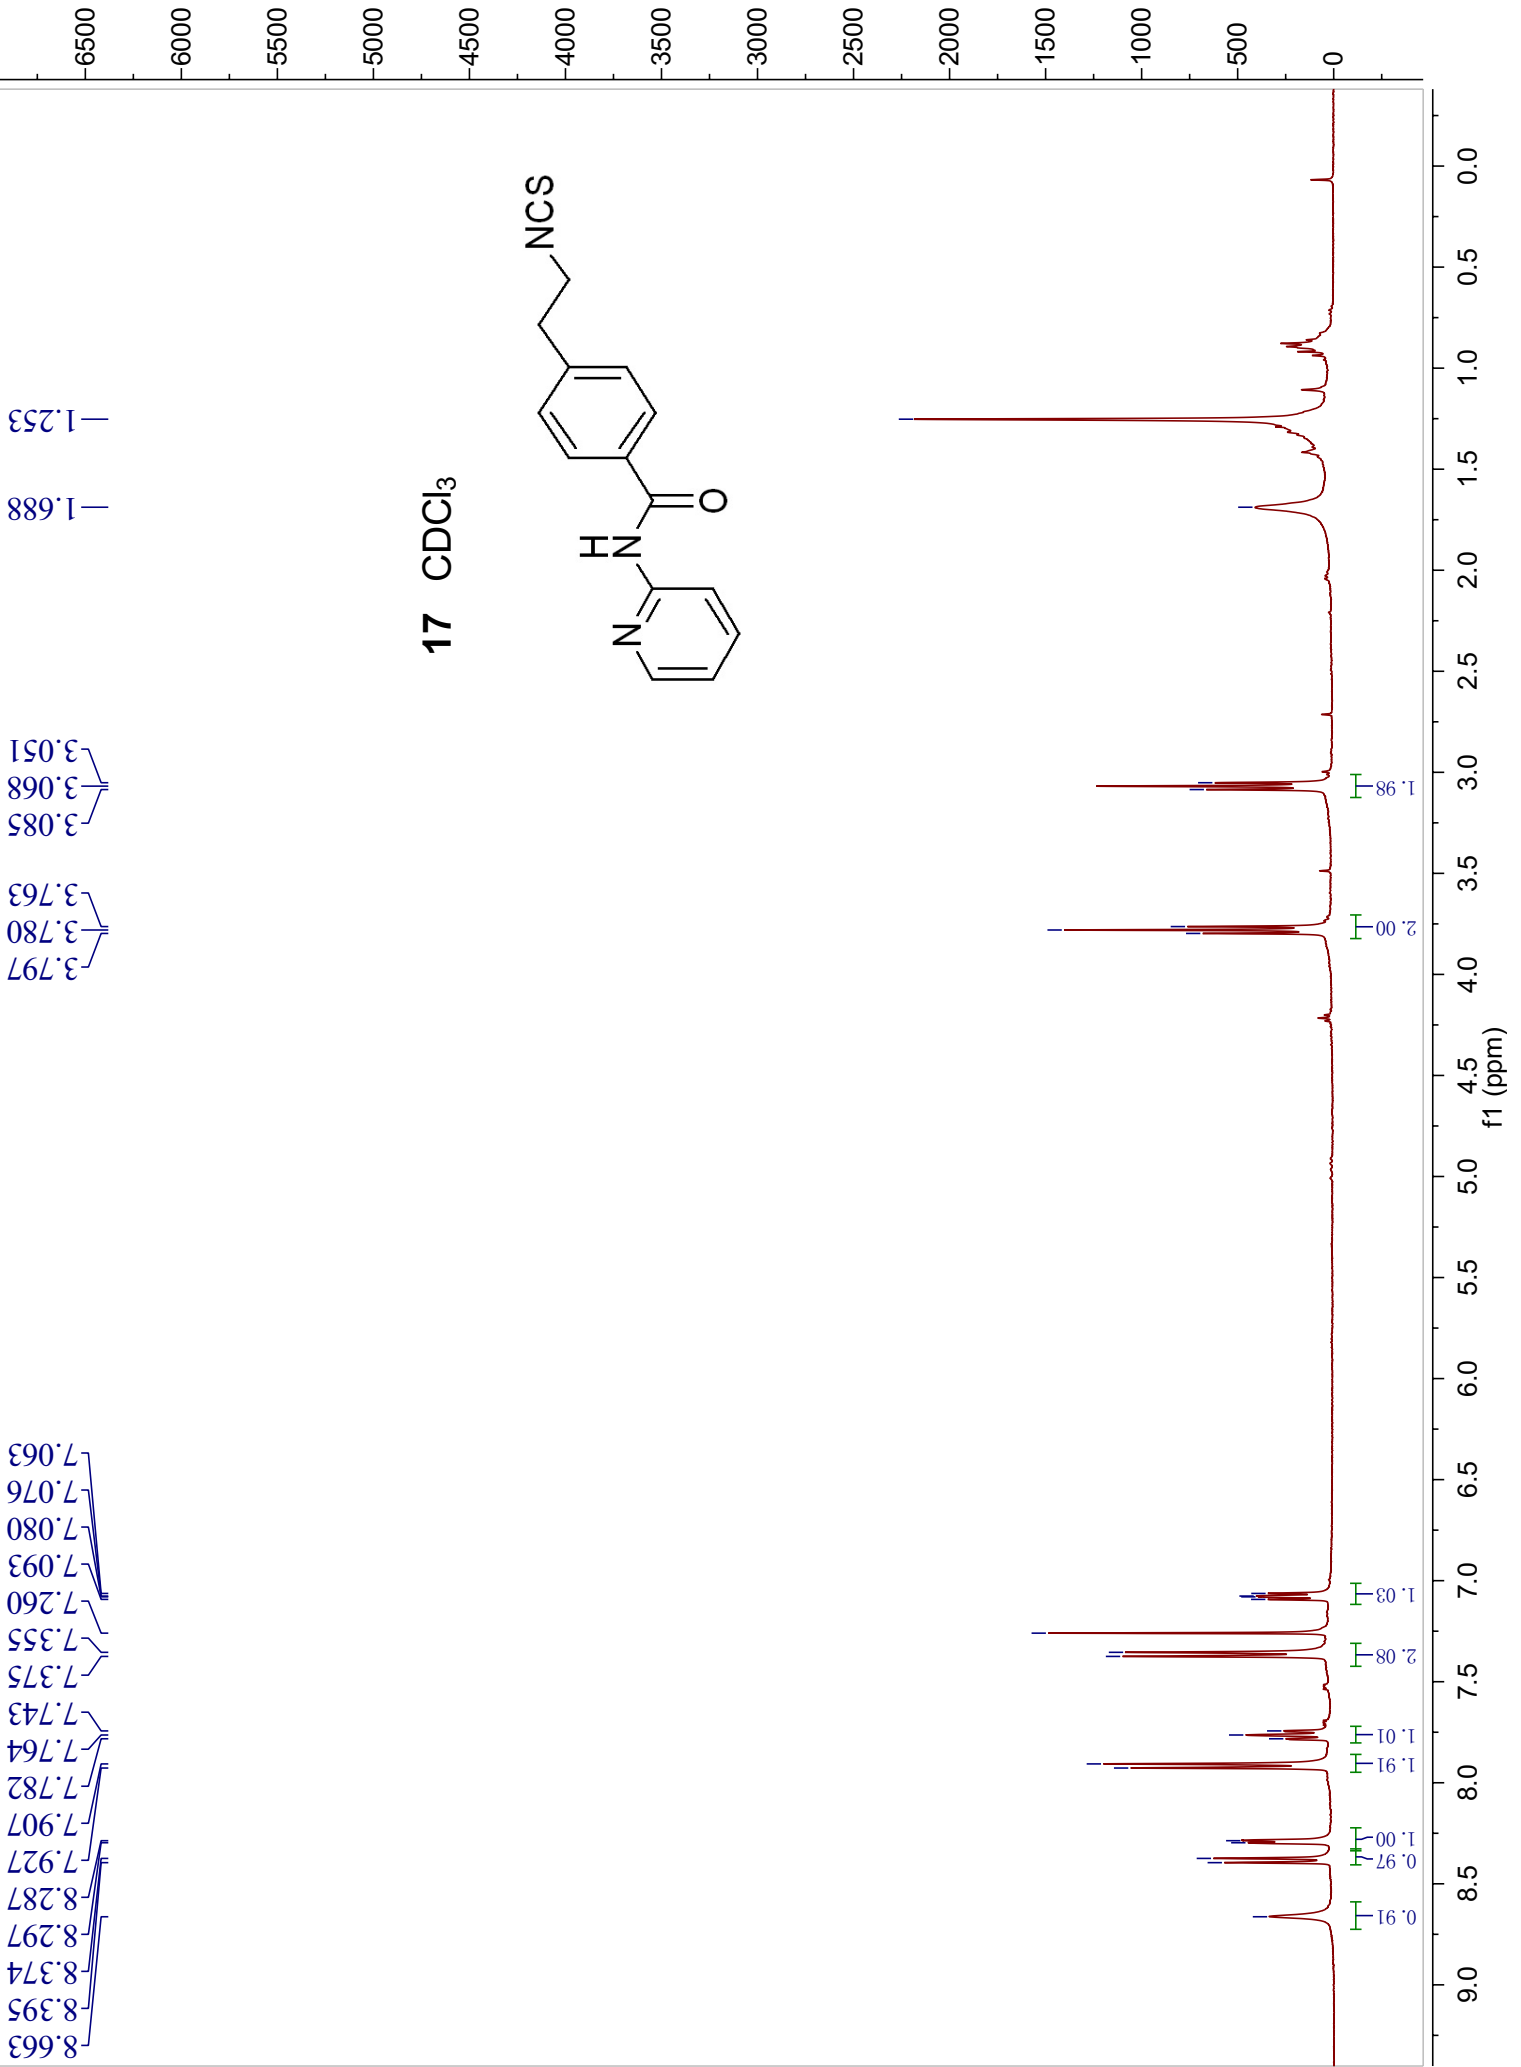

1100  
1000  
900  
800  
700  
600  
500  
400  
300  
200  
100  
0

—29.84  
—36.48  
—46.09

{76.84  
77.16  
77.48

—114.34  
—120.15  
127.91  
129.48  
133.39  
138.66  
141.77  
—148.05  
—151.65

17 CDCl<sub>3</sub>

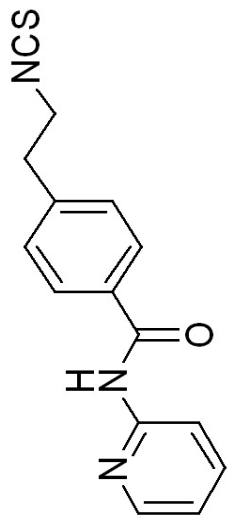

f1 (ppm)

10 20 30 40 50 60 70 80 90 100 110 120 130 140 150

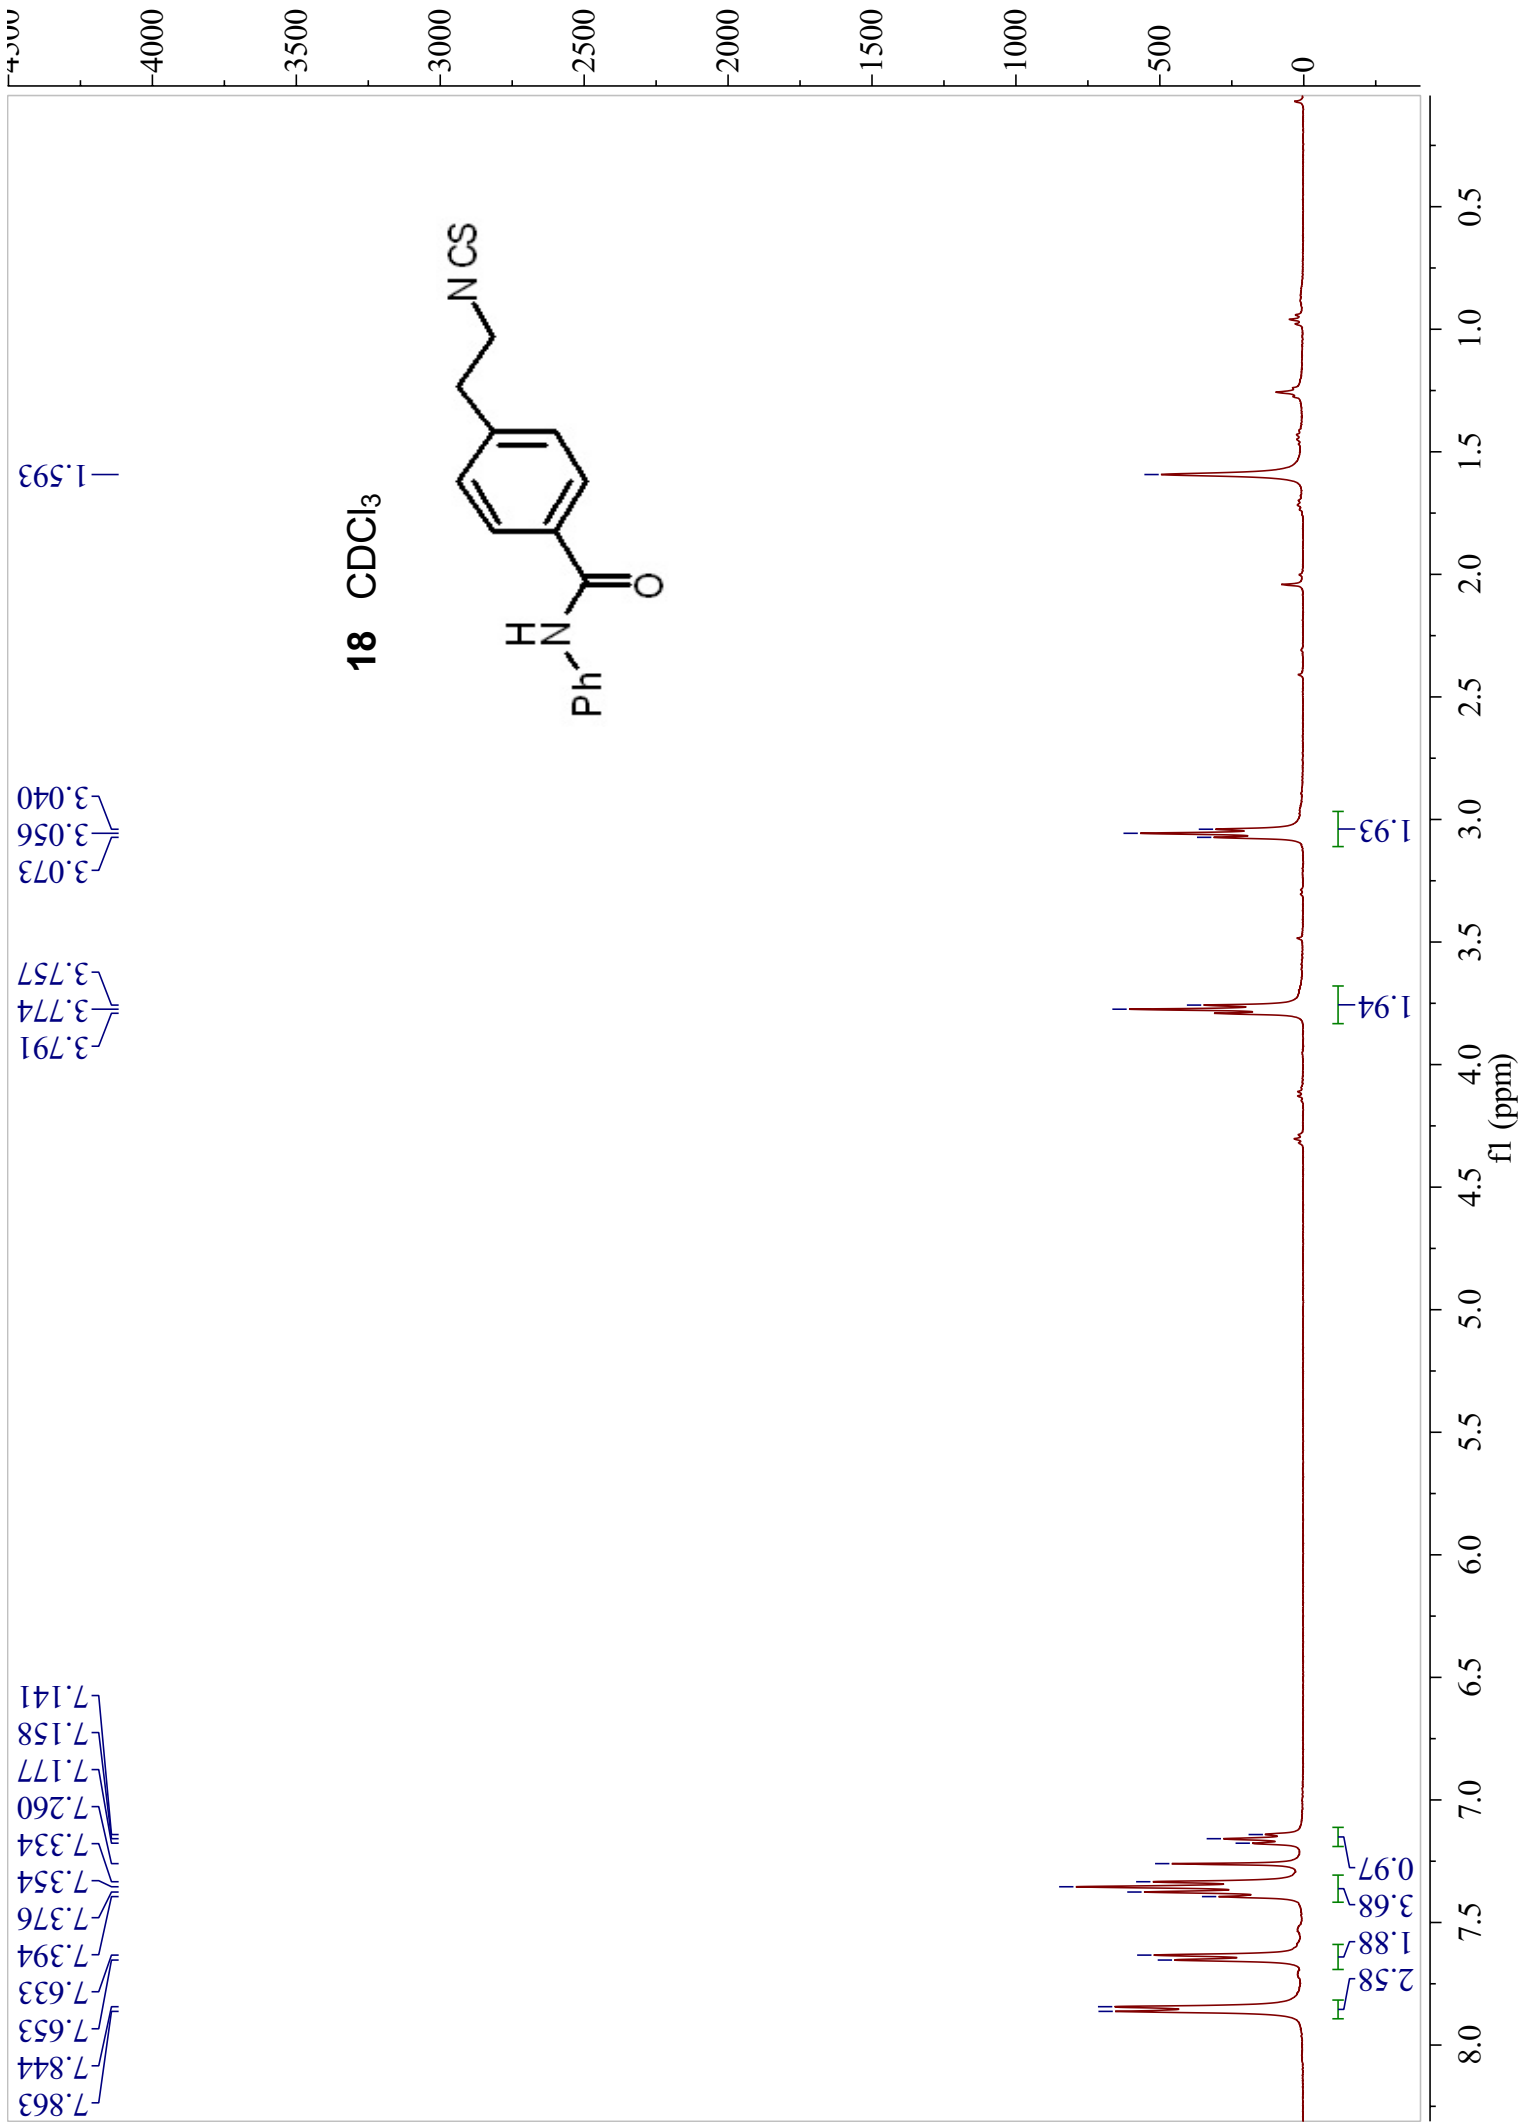

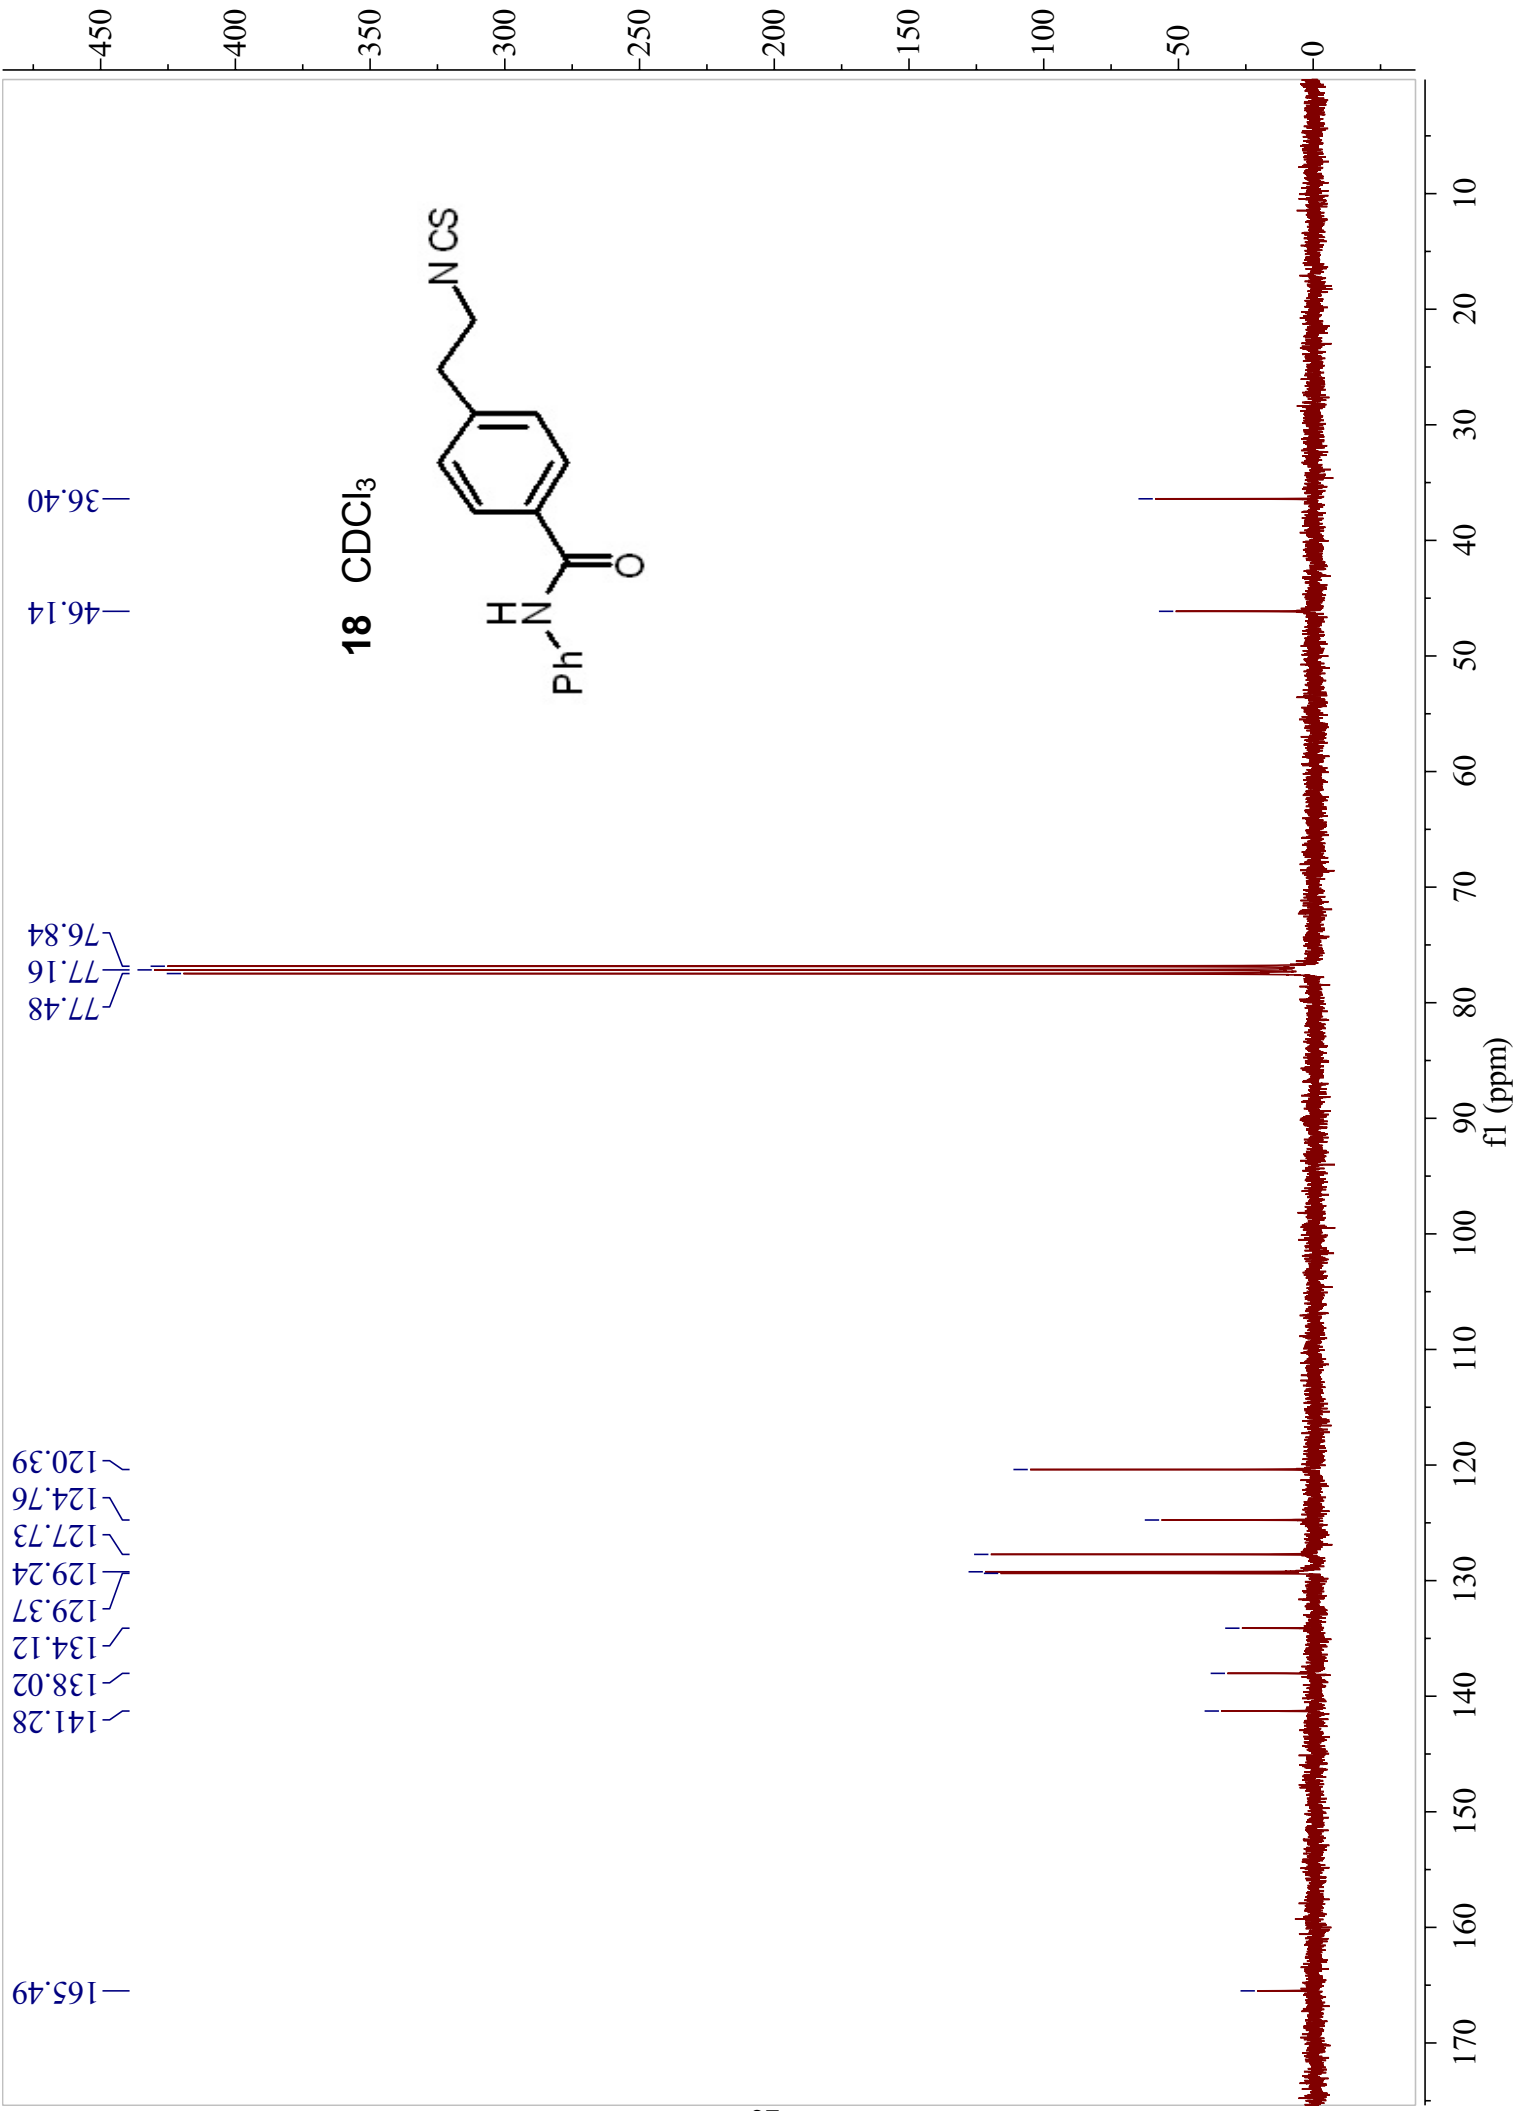

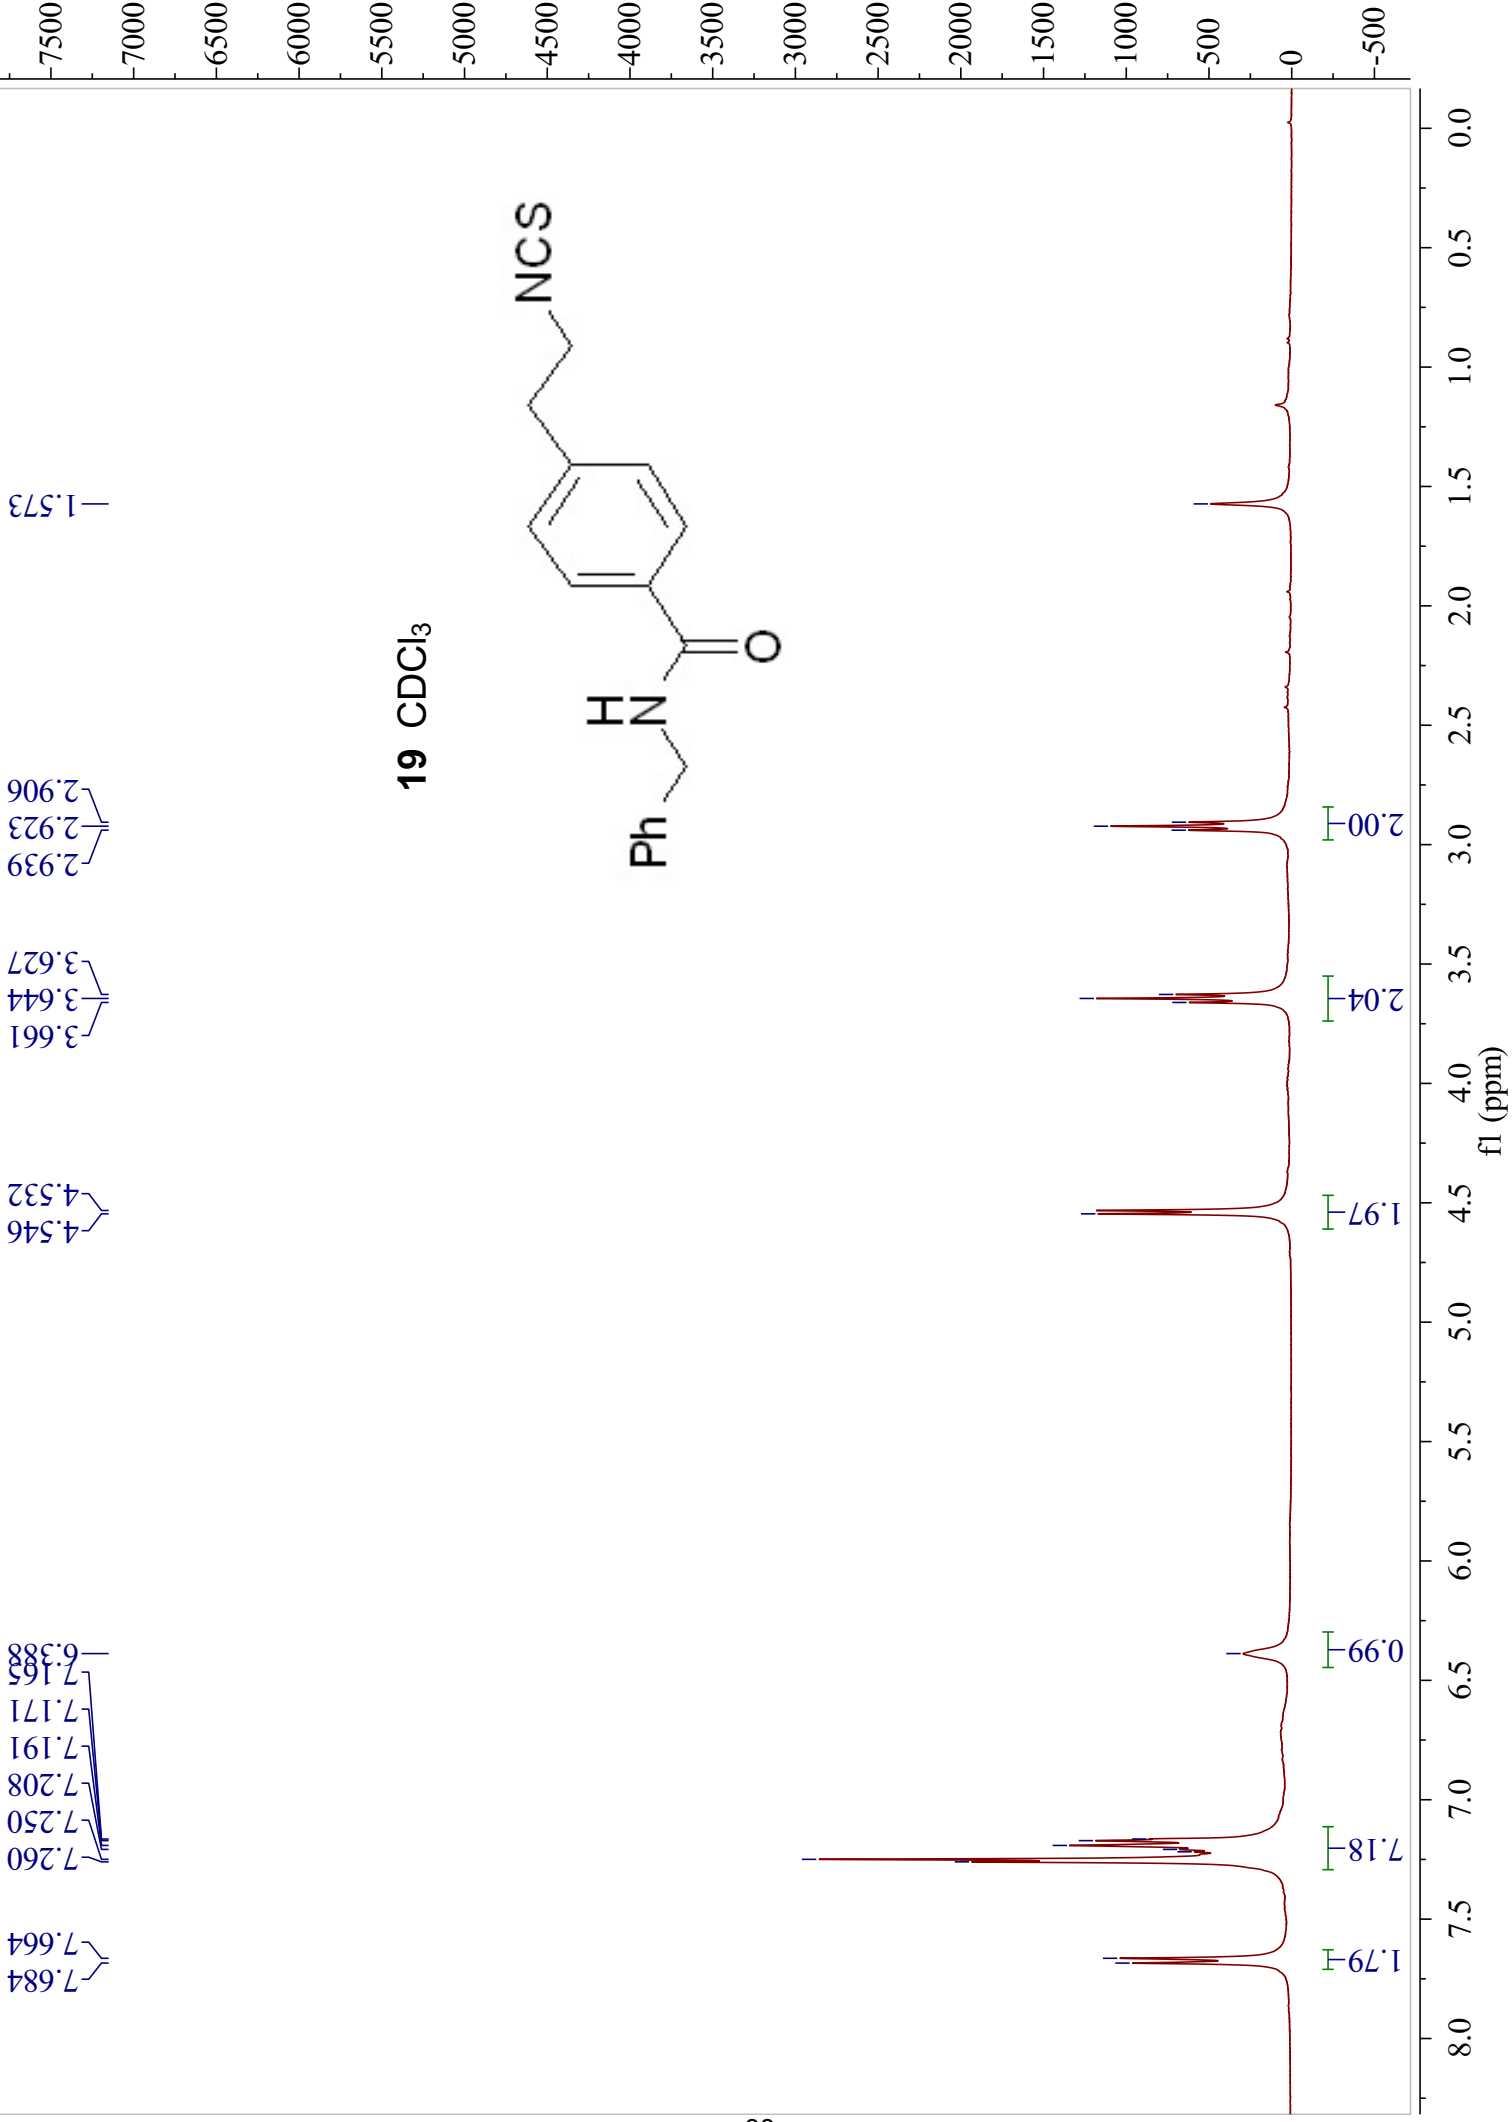

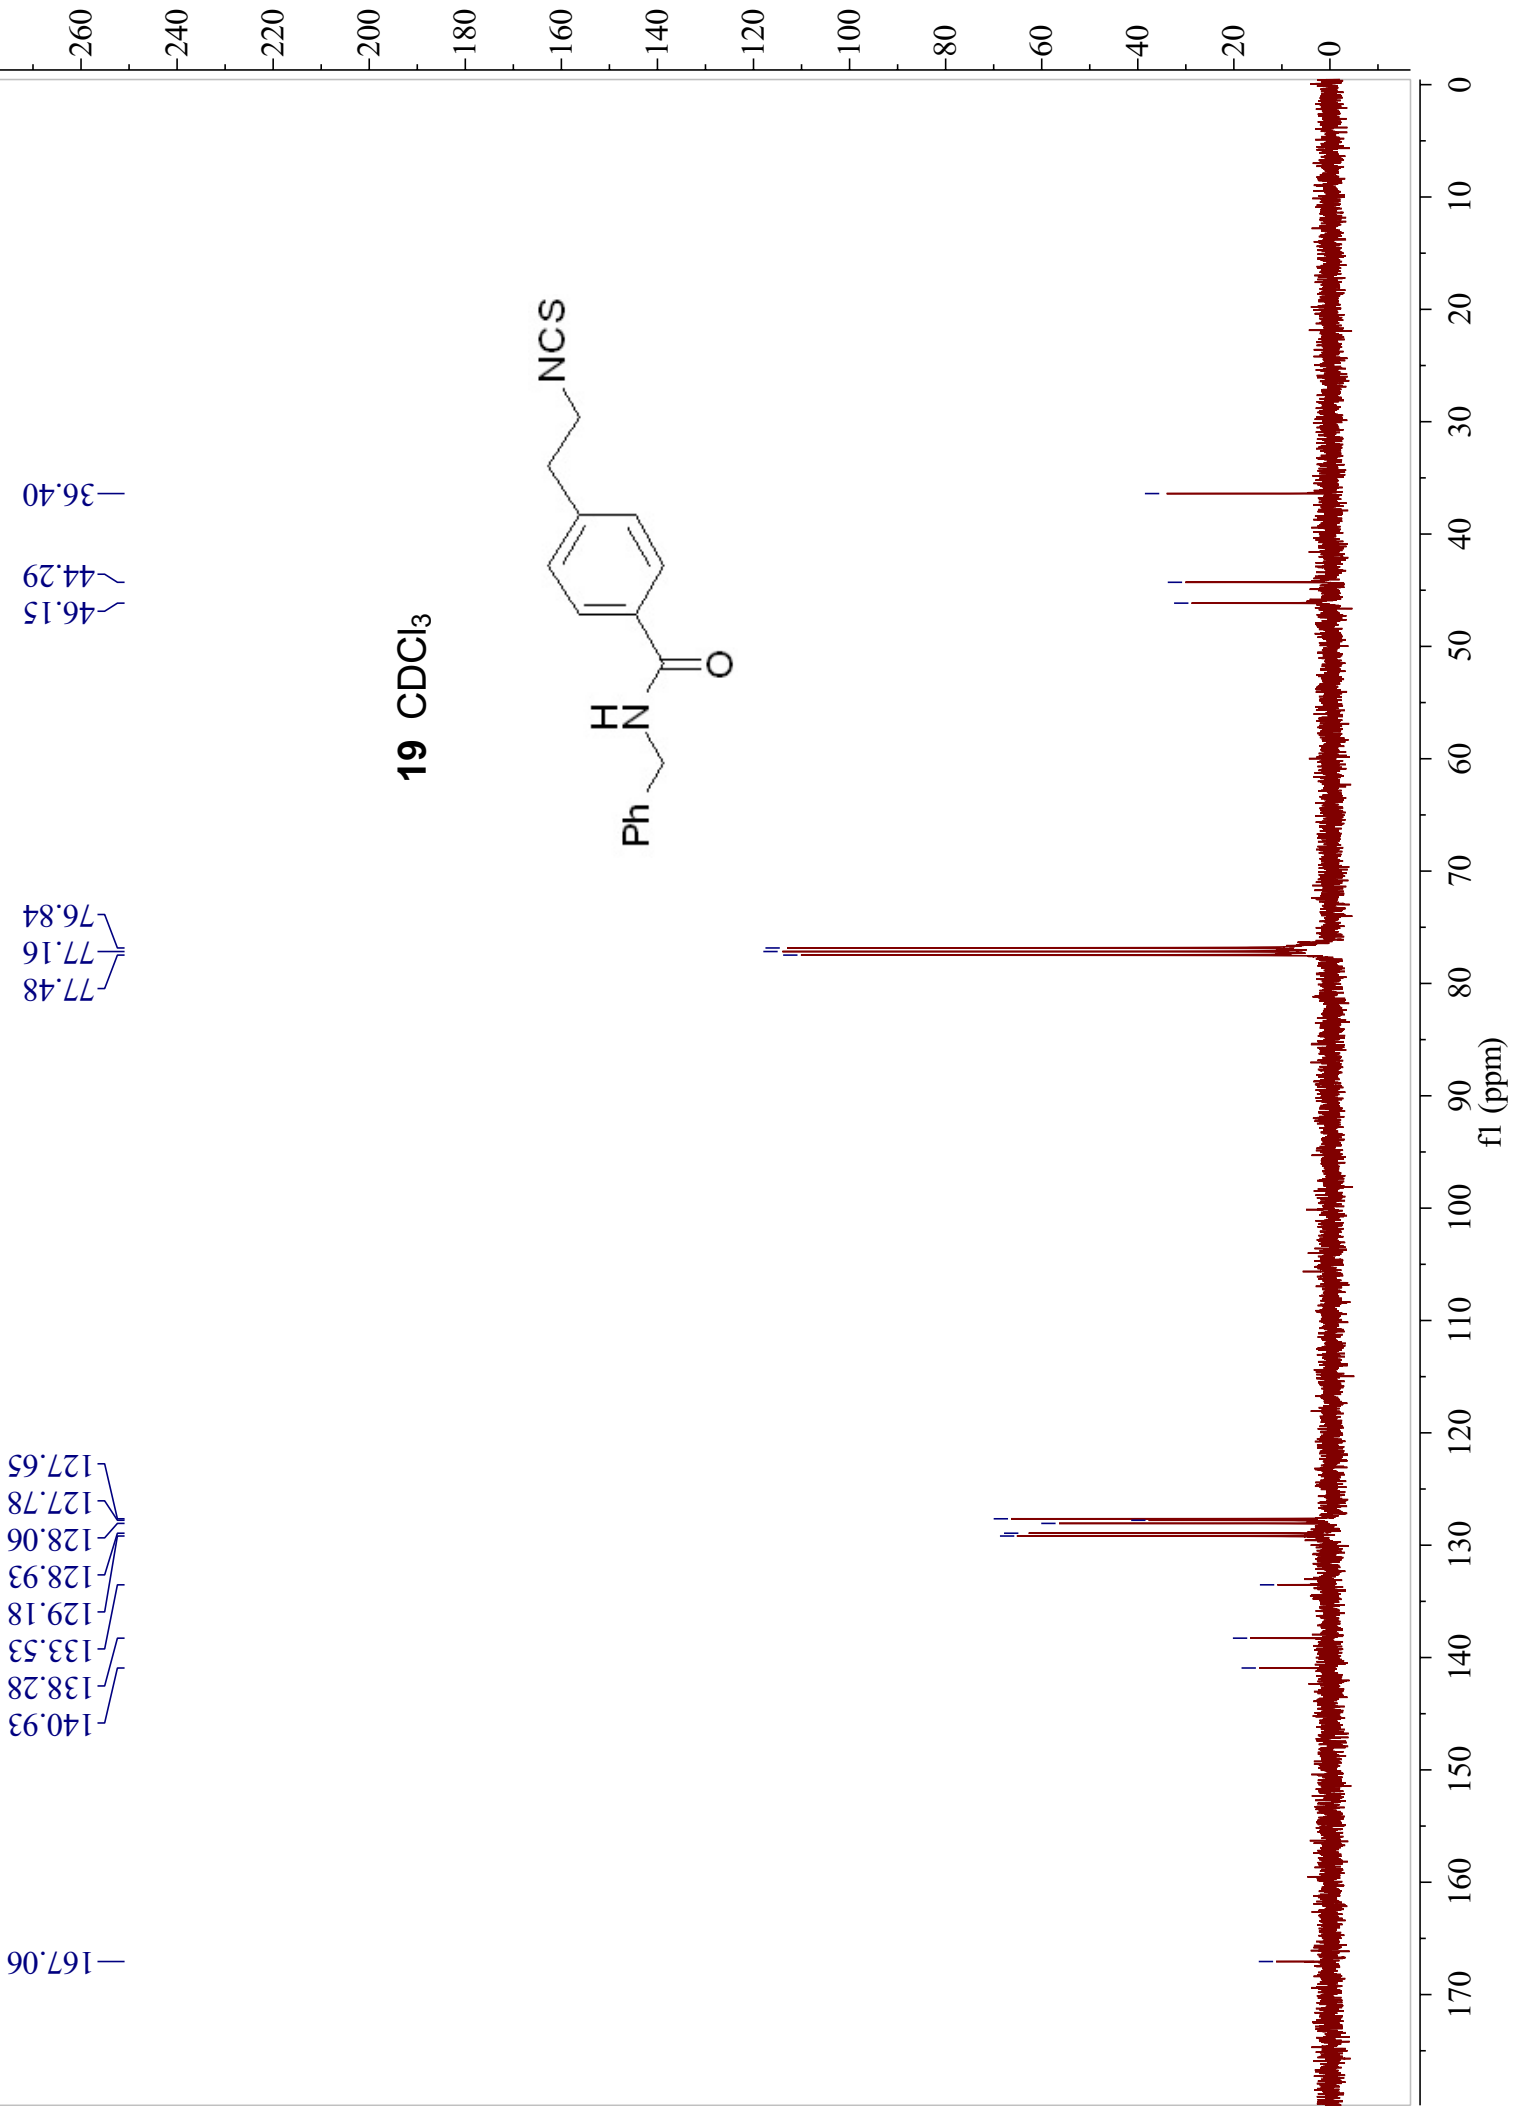

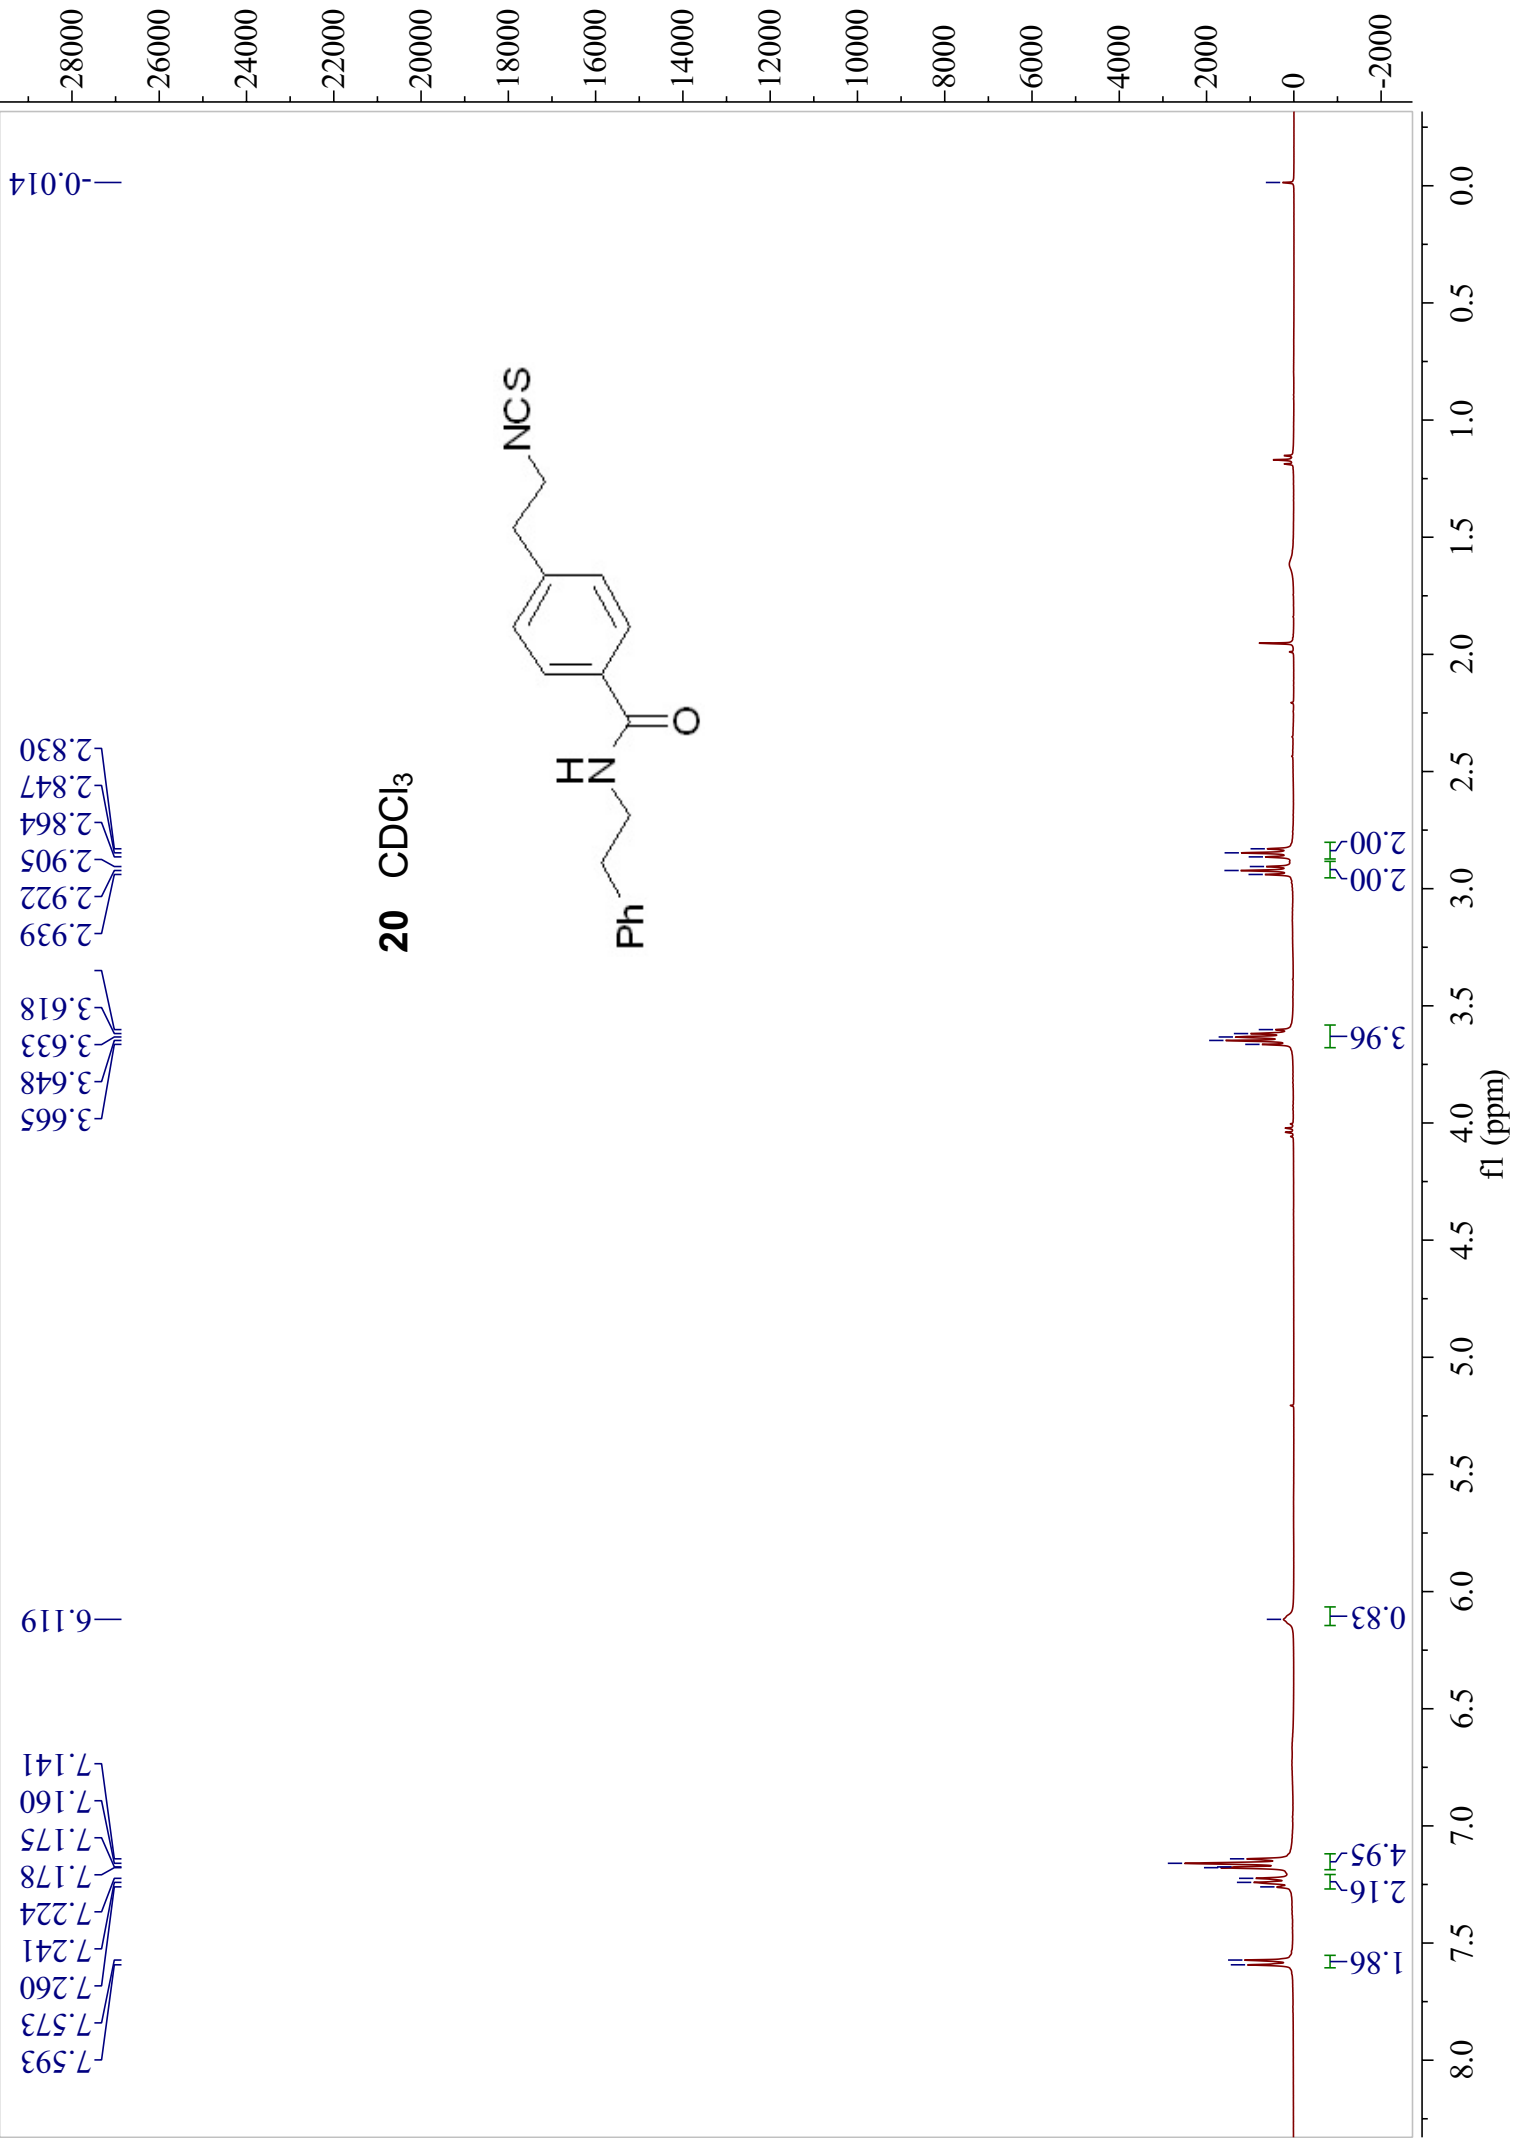



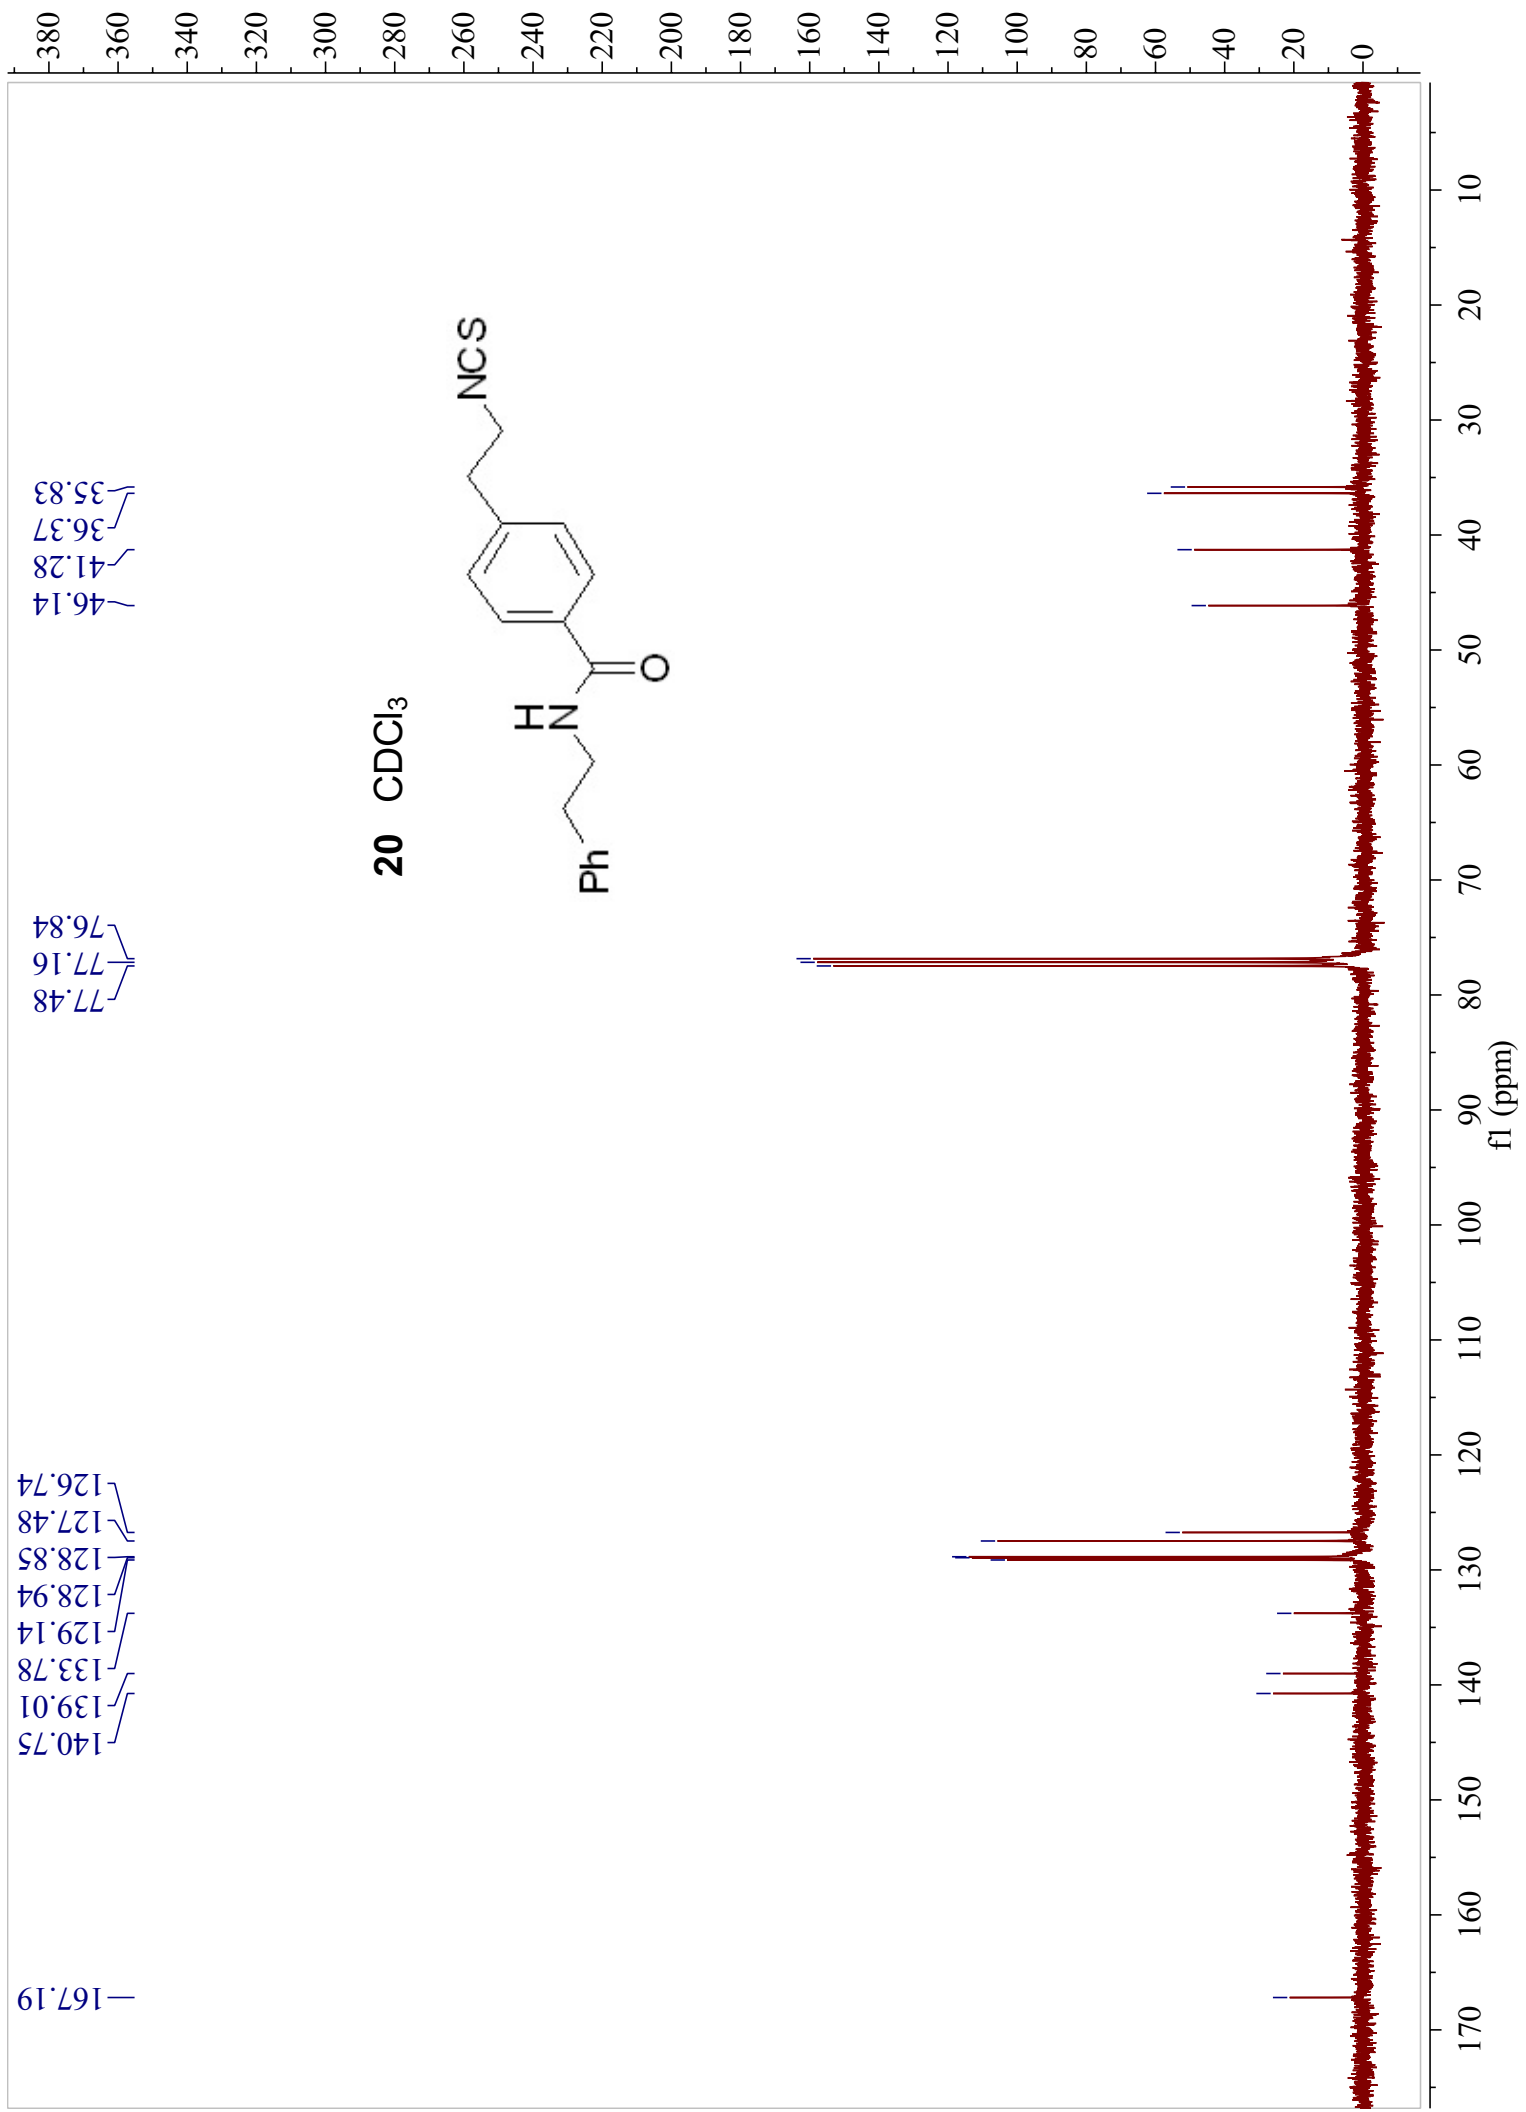

Supplement: molecules-22-00773-s001.pdf [file molecules-22-00773-s001.pdf]
